# Supplementary material for: Implementation of a peer support intervention to promote the detection, reporting and management of adverse drug reactions in people living with HIV in Uganda: a protocol for a quasi-experimental study
Source: PubMed Central journal article supplement — BMJ Open. 2022 May 18;12(5):e056039. doi: 10.1136/bmjopen-2021-056039 (PMC9121495; doi:10.1136/bmjopen-2021-056039), 2022-05-18
Supplement: bmjopen-2021-056039.draft_revisions.pdf [file bmjopen-2021-056039.draft_revisions.pdf]

# BMJ Open

BMJ Open is committed to open peer review. As part of this commitment we make the peer review history of every article we publish publicly available.

When an article is published we post the peer reviewers' comments and the authors' responses online. We also post the versions of the paper that were used during peer review. These are the versions that the peer review comments apply to.

The versions of the paper that follow are the versions that were submitted during the peer review process. They are not the versions of record or the final published versions. They should not be cited or distributed as the published version of this manuscript.

BMJ Open is an open access journal and the full, final, typeset and author-corrected version of record of the manuscript is available on our site with no access controls, subscription charges or pay-per-view fees (<http://bmjopen.bmj.com>).

If you have any questions on BMJ Open's open peer review process please email [info.bmjopen@bmj.com](mailto:info.bmjopen@bmj.com)

# BMJ Open

## Implementation of a peer support intervention to promote the detection, reporting and management of adverse drug reactions in people living with HIV in Uganda: a protocol for a quasi-experimental study

|                               |                                                                                                                                                                                                                                                                                                                                                                                                                                                                                                                                                                                                                                                                                                                                                                                                                                                                                                                                                                                                                                                                                                                                                                                   |
|-------------------------------|-----------------------------------------------------------------------------------------------------------------------------------------------------------------------------------------------------------------------------------------------------------------------------------------------------------------------------------------------------------------------------------------------------------------------------------------------------------------------------------------------------------------------------------------------------------------------------------------------------------------------------------------------------------------------------------------------------------------------------------------------------------------------------------------------------------------------------------------------------------------------------------------------------------------------------------------------------------------------------------------------------------------------------------------------------------------------------------------------------------------------------------------------------------------------------------|
| Journal:                      | <i>BMJ Open</i>                                                                                                                                                                                                                                                                                                                                                                                                                                                                                                                                                                                                                                                                                                                                                                                                                                                                                                                                                                                                                                                                                                                                                                   |
| Manuscript ID                 | bmjopen-2021-056039                                                                                                                                                                                                                                                                                                                                                                                                                                                                                                                                                                                                                                                                                                                                                                                                                                                                                                                                                                                                                                                                                                                                                               |
| Article Type:                 | Protocol                                                                                                                                                                                                                                                                                                                                                                                                                                                                                                                                                                                                                                                                                                                                                                                                                                                                                                                                                                                                                                                                                                                                                                          |
| Date Submitted by the Author: | 03-Aug-2021                                                                                                                                                                                                                                                                                                                                                                                                                                                                                                                                                                                                                                                                                                                                                                                                                                                                                                                                                                                                                                                                                                                                                                       |
| Complete List of Authors:     | Kiguba, Ronald; Makerere University College of Health Sciences, Pharmacology and Therapeutics<br>Ndagije, Helen ; National Drug Authority, Directorate of Product Safety<br>Nambasa, Victoria; National Drug Authority, Directorate of Product Safety<br>Katureebe, Cordelia; Ministry of Health, AIDS Control Programme<br>Zakumumpa, Henry; Makerere University College of Health Sciences<br>Nanyonga, Stella; Makerere University College of Health Sciences<br>Ssanyu, Jacquelyn ; Makerere University College of Health Sciences, Department of Pharmacy<br>Tregunno, Phil; Medicines and Healthcare Products Regulatory Agency<br>Harrison, Kendal; Medicines and Healthcare Products Regulatory Agency<br>Fukushima, Ayako; World Health Organization<br>Iessa, Noha; World Health Organization<br>Pal, Shanthi Narayan; World Health Organization<br>Merle, Corinne; World Health Organization, Special Programme for Research & Training In Tropical Diseases (TDR)<br>Raguenaud, Marie-eve; World Health Organization, Special Programme for Research & Training In Tropical Diseases (TDR)<br>Kitutu, Freddy; Makerere University School of Health Sciences, Pharmacy |
| Keywords:                     | Adverse events < THERAPEUTICS, SOCIAL MEDICINE, Epidemiology < INFECTIOUS DISEASES, Pharmacology < TROPICAL MEDICINE                                                                                                                                                                                                                                                                                                                                                                                                                                                                                                                                                                                                                                                                                                                                                                                                                                                                                                                                                                                                                                                              |
|                               |                                                                                                                                                                                                                                                                                                                                                                                                                                                                                                                                                                                                                                                                                                                                                                                                                                                                                                                                                                                                                                                                                                                                                                                   |

SCHOLARONE™  
Manuscripts

1  
2  
3 **Implementation of a peer support intervention to promote the detection,**  
4 **reporting and management of adverse drug reactions in people living with HIV**  
5 **in Uganda: a protocol for a quasi-experimental study**  
6  
7  
8

9 **Authors:**

10 *Ronald Kiguba<sup>1\*</sup>, Helen B. Ndagije<sup>2</sup>, Victoria Nambasa<sup>2</sup>, Cordelia Katureebe<sup>3</sup>, Henry*  
11 *Zakumumpa<sup>4</sup>, Stella Nanyonga<sup>5</sup>, Jacquellyn Nambi Ssanyu<sup>6</sup>, Phil Tregunno<sup>7</sup>, Kendal*  
12 *Harrison<sup>7</sup>, Ayako Fukushima<sup>8</sup>, Noha Iessa<sup>8</sup>, Shanthi Narayan Pal<sup>8</sup>, Corinne S Merle<sup>9</sup>, Marie-*  
13 *eve Raguenaud<sup>9</sup>, Freddy Eric Kitutu<sup>6</sup>*  
14  
15

16 \*Correspondence to: Ronald Kiguba (Tel: +256 701 840683; Email: [kiguba@gmail.com](mailto:kiguba@gmail.com))  
17

18 **Affiliations:**

19  
20 <sup>1</sup>Department of Pharmacology and Therapeutics, Makerere University College of Health  
21 Sciences, Kampala, Uganda  
22

23 <sup>2</sup>National Pharmacovigilance Centre, National Drug Authority, Kampala, Uganda  
24

25 <sup>3</sup>AIDS Control Programme, Ministry of Health, Kampala, Uganda  
26

27 <sup>4</sup>School of Public Health, Makerere University College of Health Sciences, Kampala, Uganda  
28

29 <sup>5</sup>Clinical Epidemiology Unit, Makerere University College of Health Sciences, Kampala,  
30 Uganda  
31

32 <sup>6</sup>Sustainable Pharmaceutical Systems (SPS) unit, Department of Pharmacy, School of  
33 Health Sciences, Makerere University College of Health Sciences, Kampala, Uganda  
34

35 <sup>7</sup>Medicines and Healthcare products Regulatory Agency, London, United Kingdom  
36

37 <sup>8</sup>World Health Organization, Geneva, Switzerland  
38

39 <sup>9</sup>The Special Programme for Research & Training in Tropical Diseases (TDR), World Health  
40 Organization, Geneva, Switzerland  
41  
42  
43  
44  
45  
46  
47  
48  
49  
50  
51  
52  
53  
54  
55  
56  
57  
58  
59  
60

## Abstract

**Introduction:** Patients have contributed <1% of all spontaneous adverse drug reaction (ADR) reports in Uganda's pharmacovigilance database. Peer support combined with mobile technologies could empower people living with HIV (PLHIV) to report ADRs and improve ADR management through linkage to care. We seek to test the feasibility and effect of a peer support intervention on ADR-reporting by PLHIV receiving dolutegravir (DTG)-based antiretroviral therapy (ART) and/or Isoniazid Preventive Therapy (IPT) in Uganda; identify barriers and facilitators to implementing this intervention; and characterise ADR-reporting and management.

**Methods and analysis:** A quasi-experimental study with both quantitative and qualitative methods will be implemented over 4-months at 12 intervention and 12 comparison ART-sites selected from four geographical regions of Uganda. From each region, two blocks each consisting of a tertiary care, secondary care and primary care ART-site will be selected by simple random sampling. In each of the four regions, one block of ART-sites will be enrolled into the intervention arm and the other block into the comparison arm.

The study units include ART-sites and PLHIV on DTG-based ART and/or IPT in both arms. The intervention arm will have peer supporters who will be expert clients from among PLHIV and/or recognized community health workers. PLHIV at intervention sites will be assigned to peer supporters to empower them to report ADRs directly to the National Pharmacovigilance Centre (NPC).

Direct patient-reporting of ADRs to NPC in both arms will leverage the Med Safety App and toll-free Unstructured Supplementary Service Data interface to augment traditional pharmacovigilance methods.

**Ethics and dissemination:** The study received ethical approval from the School of Health Sciences Research and Ethics Committee at Makerere University College of Health Sciences (MAKSHSREC-2020-64) and administrative clearance from Uganda National Council for Science and Technology (HS1206ES). The results will be shared with PLHIV, policy-makers, the public and academia. [299 words].

**Trial registration:** ISRCTN75989485

### Strengths and limitations of the study

The study will blend a novel peer support intervention with mobile data transmission technologies to promote the detection and reporting of suspected adverse drug reactions (ADRs) by people living with HIV

People living with HIV who experience serious ADRs will be linked directly to health facilities for ADR management

An implementation research approach will be employed to identify the factors that could influence the uptake of peer support in patient-reporting of ADRs while documenting predefined outputs and outcomes relevant to the research objectives

The study will generate pilot data on effect sizes to aid the planning of future randomized controlled trials using peer support to promote patient-reporting of ADRs

For peer review only

## Introduction

Adverse drug reactions (ADRs) are a leading cause of morbidity, mortality and increased healthcare costs[1-3]. The timely detection and reporting of ADRs promotes their appropriate management, more accurate prediction and prevention[4]. Pharmacovigilance systems worldwide have identified and led to withdrawal from the market of at least 462 harmful medicines, primarily through passive spontaneous ADR-reporting by healthcare professionals (HCPs)[5], thereby contributing to patient safety. The major drawback of the spontaneous pharmacovigilance system is its reliance on individual HCP motivation. It is estimated that only about 10% of ADRs are reported through the spontaneous pharmacovigilance system, which is a very low rate of ADR-reporting[6-8]. Several factors hinder ADR-reporting by HCPs including medical specialty, lower-level healthcare facility, older HCP age, heavy workloads, shortage of reporting tools, ignorance and fear of litigation[8, 9].

Patient-reporting of suspected ADRs is given little attention in developing countries. Yet, patients are a known complementary source of pharmacovigilance data[10-12]. Patients can make detailed ADR-reports and with similar quality as ADR-reports from HCPs. Patients can also report previously unknown ADRs[13]. Thus, patients are well-placed to participate in ADR-reporting because they have first-hand experience of their own state of health and treatment. Patient involvement in ADR-reporting aligns with the increasing global momentum towards patient-centred healthcare[14]. Yet, patient participation in pharmacovigilance is under-explored with little empirical data, especially in low- and middle-income countries (LMICs). In Uganda, patients' contribution to ADR-reporting is very low indeed and is estimated at less than 1% of the reports in the national pharmacovigilance database (Victoria Nambasa, Pharmacovigilance Manager at National Drug Authority (NDA); personal communication; 6 April 2020).

The quest for expanded avenues to increase the reporting of suspected ADRs has never been more apparent than in Uganda where dolutegravir (DTG) and Isoniazid Preventive Therapy (IPT) have been massively rolled-out since 2018 and 2019, respectively. Anecdotal evidence in Uganda shows that increased use of DTG and IPT has led to a higher incidence of associated ADRs[15, 16], necessitating a more robust pharmacovigilance system that leverages the reporting of ADRs by PLHIV on DTG-based regimens and IPT. Hyperglycaemia occurs in <7% of ART-naïve PLHIV after 96-weeks of follow-up and 14% at 48-weeks in ART-experienced PLHIV in Europe and North America[17]. Other DTG-related serious ADRs occur in 1.7% (33/1950) for neuropsychiatric effects and 0.1% (1/1073) for hepatotoxicity among Europeans[18, 19]. The incidence of IPT-related ADRs is 0.5% according to a South African trial of 24,221 PLHIV in which liver function tests were not routinely done; skin rash (0.25%), peripheral neuropathy (0.21%), clinical hepatotoxicity (0.07%) and convulsions (0.02%) were also observed[20]. This study proposes to test the feasibility and effect of a peer support intervention combined with mobile phone-based tools to promote the reporting of ADRs in PLHIV on DTG-based ART and/or IPT in Uganda. If successful, this study will contribute to the development of a more robust pharmacovigilance system to better document serious ADRs in the Ugandan setting.

Patient-centred peer support has shown promise in the management of chronic illnesses such as diabetes and mental health[21, 22]; and in improving retention in HIV care and adherence to ART[23, 24]. Thus, peer support could substantially promote the detection, reporting and management of ADRs by PLHIV. In the current study, peer support is based on the premise

1  
2  
3 that PLHIV who have previously experienced ADRs linked to ART can – as peer supporters -  
4 encourage, mentor and support other similarly affected but less experienced PLHIV to detect  
5 and report ADRs[25]. Peer supporters could serve as positive role models to improve the self-  
6 efficacy and confidence of other PLHIV whom they could guide to identify and report ADRs  
7 using the available tools. Direct patient-reporting of ADRs could utilize the Med Safety mobile  
8 application, a toll-free Unstructured Supplementary Service Data (USSD) interface and the  
9 traditional pharmacovigilance methods of paper-form, online forms and voice call. The aim  
10 remains to have all suspected ADR reports submitted to the National Pharmacovigilance  
11 Centre (NPC) database for analysis and subsequent processing. However, those that require  
12 clinical management should be brought to the attention of the HCP for appropriate  
13 management and prevention[25-27]. From guiding less experienced PLHIV, expert clients  
14 serving as peer supporters could equally be empowered to build their own self-esteem[28,  
15 29].  
16  
17  
18  
19

20 Our peer support intervention for strengthening the Ugandan pharmacovigilance system  
21 through patient-reporting of ADRs is intended to leverage the available mobile technologies  
22 e.g. the USSD platform available for both low-tech non-smartphones and high-tech  
23 smartphones[30]; and the Med Safety mobile application for high-tech smartphones[31].  
24 USSD is a real-time text-driven technology which allows users to interact directly from their  
25 mobile phones by making a selection from a menu. It allows for faster two-way communication  
26 of information and enables rapid exchange of data - up to seven times faster than SMS[32].  
27 The USSD interface has been a key success factor in the extensive penetration of mobile  
28 money banking in rural unbanked sub-Saharan Africa[33]. No Internet connection is needed.  
29 This project's toll-free USSD code has been developed by a private Ugandan software  
30 company[34]. Med Safety is a smartphone mobile application for ADR-reporting that was  
31 recently adapted for LMICs from the prototype app funded by the European Union's Innovative  
32 Medicines Initiative – the WEB-RADR project. Adaptation of the mobile app is led by UK's  
33 Medicines and Healthcare products Regulatory Agency in collaboration with World Health  
34 Organization (WHO) and the WHO Collaborating Centre for International Drug Monitoring, the  
35 Uppsala Monitoring Centre (UMC)[35]. Med Safety was launched in Uganda in February 2020.  
36 Using both USSD and Med Safety alongside existing pharmacovigilance methods could  
37 strengthen peer support-enhanced patient-driven pharmacovigilance in Uganda.  
38  
39  
40  
41

42 Lastly, the study will use an implementation science approach to evaluate the peer support  
43 intervention among PLHIV. Implementation research is critical in identifying factors that could  
44 influence uptake of the intervention while documenting predefined outputs and outcomes  
45 relevant to the research objectives[36]. Our ultimate goal is to increase patient reporting of  
46 ADRs in LMICs such as Uganda with weak pharmacovigilance systems. Hence, this study  
47 aims to develop and assess the feasibility of a peer support intervention combined with mobile  
48 phone-based tools to promote the detection and reporting of ADRs in PLHIV on DTG-based  
49 ART and/or IPT in Uganda. It will identify the barriers and facilitators to implementing the  
50 intervention, characterise ADR-reporting and management and estimate the effect of the  
51 intervention on ADR-reporting among PLHIV.  
52  
53  
54

## 55 **Research hypotheses and objectives**

### 56 Research hypotheses:

57 We hypothesize that the patient-centred peer support intervention combined with existing  
58 mobile data transmission technologies for promoting the detection, reporting and management  
59  
60

1  
2  
3 of ADRs in PLHIV is feasible and acceptable. We also hypothesize that this peer support  
4 intervention combined with mobile data transmission technologies will significantly increase  
5 the number of ADR reports submitted to NPC by PLHIV who receive the intervention during  
6 4-months of follow-up when compared to PLHIV who do not receive the intervention.  
7  
8

9 Specific objectives:

- 10  
11  
12  
13  
14  
15  
16  
17  
18  
19  
20  
21  
22  
23  
24  
25  
26  
27  
28  
29  
30  
31  
32  
33  
34  
35  
36  
37  
38  
39  
40  
41  
42  
43  
44  
45  
46  
47  
48  
49  
50  
51  
52  
53  
54  
55  
56  
57  
58  
59  
60
1. To develop a peer support intervention combined with mobile data transmission technologies to promote the detection, reporting and management of ADRs in PLHIV receiving DTG and/or IPT in Uganda
  2. To explore the barriers and facilitators to implementation of the peer support intervention combined with mobile data transmission technologies to promote ADR detection, reporting and management among PLHIV on DTG and/or IPT in Uganda
  3. To describe the patterns of ADR-reporting (number, rate, quality, time to reporting, seriousness etc.) by PLHIV receiving DTG and/or IPT in whom the peer support intervention combined with mobile data transmission technologies is implemented in Uganda
  4. To estimate the effect of the peer support intervention combined with mobile data transmission technologies on the rate of ADR-reporting by PLHIV receiving DTG and/or IPT in Uganda



## Methods

### Study setting

Uganda has a tiered healthcare system with different levels of healthcare from the National Referral Hospitals which provide tertiary and super-specialized healthcare, through Regional Referral Hospitals (RRHs), General Hospitals, level IV Health Centers (HC IV), level III Health Centers (HC III), to level II Health Centers (HC II) that progressively offer less scope and breadth of health services to out-patient services[37]. HIV treatment and care is provided from HC III and upwards giving a total of 1,832 accredited centers that provide ART services in Uganda. Uganda adopted the Differentiated Service Delivery Models (DSDM), where stable clients have less frequent clinical assessment visits. In 2019, about 80% (1,466/1,832) of the ART accredited sites and 78% (975,675/1,241,478) of PLHIV on ART had access to the DSDM model. An additional, 12% (114,363/975,675) of clients enrolled on DSDM received ART services from the community through Community Drug Distribution Points (CDDP) and Community Client-Led ART Distribution (CCLAD)[38].

Uganda has an estimated 1.46 million PLHIV, of whom prevalence among people aged 15 to 49 years is 5.8% with women having a higher prevalence (7.1%) than men (4.3%). Among the PLHIV, 93% are aged  $\geq 15$  years and 60% of the HIV-infected adults are women. In 2019, there were 53,413 new HIV infections of which 40,000 were among adults and 21,000 Ugandans died of AIDS-related illnesses[39]. Following the "Test and Treat" policy for HIV adopted in 2016 and scaled up in 2017, the ART coverage was at 89% in 2019. Approximately 96% of PLHIV on ART are taking first-line regimens and >443,000 PLHIV are on TLD. About 17% of PLHIV are ART-naïve at treatment initiation. In 2019, about 41% of TB patients were HIV-positive and 97% of HIV-positive TB patients were receiving ART[39, 40]. By the end of 2019, 477,190 of PLHIV were enrolled on IPT. Strategies to strengthen pharmacovigilance were instituted as part of DTG/IPT roll-out in the 2020 revised Consolidated Guidelines for Prevention and Treatment of HIV and AIDS in Uganda[16]. The guidelines support ADR identification, monitoring and reporting, particularly for DTG and IPT. Pharmacovigilance sentinel sites were established at 18 sentinel sites (RRHs and Centers of Excellence). These ART-sites received training and ADR-reporting tools. ADRs are reported to the NPC at NDA through a paper-based system, online system, toll-free phone line or through NDA's Med Safety App.

For the current study, the authors have divided the country into four geographical regions to establish a sampling framework that leads to selection of national level representation of health facilities and factors that influence provision of care to PLHIV and their pharmacovigilance-related needs. In each region, two blocks of health facilities with ART-sites will be selected of which one block will implement the intervention and the other will serve as the comparison block of health facilities. Each block will consist of an ART-site at a RRH (tertiary care), a HC IV (secondary care) and HC III (primary care), respectively. Therefore, 12 intervention ART-sites will be matched by level of care and region with 12 comparison ART-sites from the four regions of Uganda.

### Study design

The study will employ a quasi-experimental design with pre-post and there-there comparisons to measure the preliminary impact of the peer support intervention on ADR-reporting by PLHIV, **Figure 1**. The study will use both quantitative and qualitative methods to triangulate the research findings. The qualitative research methods aim to understand the barriers and

1  
2  
3 facilitators to implementing the peer support intervention for promoting ADR detection,  
4 reporting and management from the perspective of PLHIV and in the context of their interface  
5 with Uganda's healthcare system[41] and thus they will be predominantly implemented in the  
6 intervention arm. We will explore the experiences of PLHIV in the utilization of the peer support  
7 intervention and elicit their preferences to further refine the intervention and implementation  
8 strategy.  
9

### 10 11 The intervention

12 The peer support intervention leverages mobile data transmission technologies (Med Safety,  
13 USSD) in addition to traditional pharmacovigilance methods (paper, online, voice call). The  
14 peer support mechanism has several layers of supervision from the mentored PLHIV, through  
15 peer supporters, peer supervisors, study coordinator to study investigators at the top of the  
16 hierarchy, see **Figure 2**.  
17  
18

19 The PLHIV to be mentored in the intervention arm will be assigned to peer supporters to guide  
20 their ART care for 4-months. The peer supporters will constitute a mixed group of lay people,  
21 namely; i) expert clients who are PLHIV with more experience in the use of ART and, ii)  
22 recognized community health workers (CHWs). Most CHWs in Uganda's HIV programs are  
23 expert clients. Thus, it is possible to recruit CHWs all of whom are expert clients. Mentored  
24 PLHIV in the intervention arm will identify with the peer supporters whom they will rely on to  
25 improve their healthcare-seeking behaviour and to report ADRs to NPC; they should own  
26 mobile phones.  
27  
28

29 The PLHIV will be identified at the study sites and matched with the respective peer supporters  
30 of similar age, gender and proximity of residence. The non-random allocation of participants  
31 is intended to promote easier and faster bonding of the peer-relationships. Five (5) PLHIV will  
32 be assigned to one (1) peer supporter from the same community. A weekly (minimum  
33 fortnightly) face-to-face/phone call interaction will be held between a peer supporter and each  
34 assigned PLHIV. Thus, a peer supporter will be expected to interact with one PLHIV per day  
35 and five PLHIV in five days each week. Peer supporters will use one-on-one in-person support  
36 blended with mobile phone-based interaction to guide each assigned PLHIV to recognize and  
37 report suspected ADRs to NPC. The peer supporter will also administer a short weekly  
38 questionnaire to each assigned PLHIV regarding ADR experience in the past 1-week.  
39  
40

41 This peer support intervention adapts the "humanizing healthcare model" developed by *peers*  
42 *for progress*, a group that demonstrates the value and best practices of peer support. The  
43 model is based on four functions, namely; assistance in daily management, providing social  
44 and emotional support, linking to clinical and community resources and ongoing support[42],  
45 see **Figure 3**.  
46  
47

48 Both the supported PLHIV and peer supporters will be trained on the following aspects: ART;  
49 how to live positively with HIV; recognition of suspected ADRs and how to report them via Med  
50 Safety, USSD or traditional methods (paper, online, voice call) to NPC; and about linkage or  
51 referral to health facility care e.g. when a serious ADR occurs. The supported PLHIV and peer-  
52 supporters will be trained to interact in a manner that ensures confidentiality. The data  
53 generated from Med Safety and USSD will be safeguarded according to applicable laws on  
54 data protection. The linkage to appropriate care of PLHIV by the peer supporter will aim to; i)  
55 promote healthcare-seeking behaviour of the PLHIV, ii) improve the monitoring of HIV  
56 treatment (management of serious ADRs, ART adherence, retention in care), iii) enhance  
57  
58  
59  
60

1  
2  
3 timely refill of ART prescriptions and/or, iv) provide for any other special care that PLHIV might  
4 require.  
5

6 Peer supporters will be separately trained and skilled in interpersonal interaction to be  
7 responsive to PLHIV and encourage them to identify and report any suspected ADRs. The  
8 training components for peer supporters will include care in chronic illness, ART, adherence  
9 to ART, ADRs, ADR-reporting, care-seeking, counselling and facilitative supervision. Training  
10 for the peer supporters will take up to three days. It will include a one-day didactic session  
11 followed by two days of on-the-job, one-on-one training. In addition to being trained, peer  
12 supporters will receive supplementary educational materials. Four follow-up  
13 supervisory visits/phone calls at two-week intervals will be conducted by the trainers to  
14 reinforce the knowledge, skills and attitudes gained by the peer supporters. Each supported  
15 PLHIV will receive one-day's training during his/her clinic visit which will include a didactic  
16 session and one-on-one discussion in a non-classroom environment. The trainers will be  
17 qualified individuals carefully identified by the project team with the requisite knowledge to  
18 offer the training and expertise in adult learning and counselling.  
19  
20  
21  
22

23 The peer support mechanism will have two additional layers of supervision, see **Figure 2**. The  
24 first level of additional oversight will be provided by four (4) peer supervisors identified from  
25 among the peer supporters at each of the four selected RRHs. Peer supervisors will be  
26 seconded by the study sites and collaborating patient safety groups involved in the recruitment  
27 of peer supporters. Each peer supervisor will oversee 15 peer supporters in his/her region (10  
28 from RRH, 3 from HC IV, 2 from HC III). The peer supervisor will call each peer supporter  
29 twice a month. During these 'booster' sessions, the peer supervisor will review, emphasize  
30 and re-educate peer supporters on expectations of the intervention e.g. setting and reviewing  
31 goals with PLHIV. The second level of oversight will be provided by the project coordinator  
32 who will oversee the four (4) peer supervisors whom he/she will meet/call every month. At  
33 least one study investigator, mostly the principal investigator, will participate in these  
34 meetings/calls. The project coordinator will have the requisite knowledge, skills and  
35 competence to train PLHIV and peer supporters. The project coordinator will provide support  
36 supervision and counselling to motivate the peer supervisors, peer supporters and PLHIV.  
37  
38  
39  
40

#### 41 The comparison group

42 PLHIV in the comparison group will be mobile phone owners who will be trained to recognize  
43 suspected ADRs and report them to NPC via Med Safety, USSD or the traditional  
44 pharmacovigilance methods (paper, online, toll-free voice call) to a peer-supporter, HCP or  
45 NPC, see **Figure 4**. Smartphone owners will be guided to install Med Safety for ADR-reporting.  
46 PLHIV with non-smartphones or smartphone owners who will not install Med Safety will report  
47 ADRs by USSD or the traditional reporting methods. PLHIV in this group will not receive  
48 dedicated peer support.  
49  
50

#### 51 Study units, participants and selection

52 Study units and participants:

53 This study has multiple study units and layers to assess the feasibility of implementation and  
54 effect of the intervention on promoting the detection and reporting of suspected ADRs in  
55 PLHIV on DTG-based ART and/or IPT in Uganda. From micro to macro-level, the study units  
56 include PLHIV receiving DTG-regimens and/or IPT; the pair of PLHIV and peer supporter; the  
57 peer supporter; the combination of the PLHIV with peer supporter and ART-site; peer  
58 supervisor; the pair of peer supervisor and peer supporter; and the ART-site. At the study  
59  
60

ART-site, HCPs and health facility managers will be included. Lastly, the reporting of suspected ADRs by PLHIV, peer supporters, HCPs and ART-sites to the NPC will also be examined.

Study participants will give written/thumb-printed informed consent if aged  $\geq 18$  years and [43]. About 17% of PLHIV are ART-naive, 95% are aged 15 years and older, and 89% receive first-line ART either as treatment-naive or treatment-experienced PLHIV[40].

Eligibility criteria:

*Inclusion criteria:* Selection of study units will occur at three levels: *First*, eligible PLHIV should i) be aged  $\geq 15$  years, ii) receive ART at the selected study sites, iii) own a mobile phone (smartphone, basic feature phone) and, iv) provide written/thumb-printed informed consent. Child consent can be given by emancipated minors aged 15 to 17 years in Uganda[43] *Second*, eligible peer supporters (expert clients, CHWs) will be those that are recognized and seconded by the study sites or collaborating patient safety groups. These peer supporters will be those that are attached to the study sites and have already received institutional training in their role as expert clients/CHWs; they should own mobile phones. Peer supporters will participate only in the intervention arm of the study. *Third*, study health facilities will be selected and enrolled as follows; in each of the four geographical regions, blocks of three health facilities each with an ART-site, including at least a RRH, HC IV and HC III will be created based on the catchment of each RRH. From the created blocks of three health facilities in each region, two blocks will be selected by simple random sampling to participate in the study as the intervention and comparison health facilities, respectively. This will give 24 ART-sites consisting of 12 intervention sites (4 RRHs, 4 HC IVs, 4 HC IIIs) matched by level of care and region with 12 comparison sites (4 RRHs, 4 HC IVs, 4 HC IIIs) selected from the four geographical regions of Uganda.

*Exclusion criteria:* Exclusion will apply only at the level of PLHIV as the study will need to retrospectively assess the occurrence of ADRs during the 4-month period preceding study enrolment. We shall exclude PLHIV on ART for  $< 6$ -months and expert clients/ CHWs who will be unable to commit, from the outset, at least 5-hrs per week to the study for up to 4-months.

#### Sample Size and Sampling Considerations

Sample size computation is based on the possible effect of the peer support intervention on the rate of ADR-reporting by PLHIV, with adjustment for clustering. We assume a conservative intra-cluster correlation coefficient of 0.045 and a priori increase of 50% in the rate of ADR-reporting to NDA, from 6 ADR-reports per 100 person-years at baseline[44] to 9 ADR-reports per 100 person-years at end-line evaluation. We assume a standard deviation of 12 ADR-reports per 100 person-years computed from the monthly ADR-reports submitted to NPC for one-year (October 2018 to September 2019). The study is designed to have at least 80% power to estimate an effect size of 1.5. Thus, 126 PLHIV will be required in the intervention arm and 126 PLHIV in the control arm.

Since the caseload for each peer supporter will be 5 PLHIV in the intervention arm, 60 peer supporters (15 from each of the 4 regions) will be responsible for 300 PLHIV on DTG and/or IPT. Thus, the peer support arm will include 300 PLHIV and the control arm 300 PLHIV all of whom should own functional mobile phones (smartphone or non-smartphone or both). Thus, a total of 600 PLHIV will be enrolled; 400 from RRHs, 120 from HC IVs and 80 from HC IIIs.

1  
2  
3 The PLHIV will be enrolled consecutively until the required sample size is attained.  
4 Smartphone owners will be guided to install Med Safety for ADR-reporting. We assume that 7  
5 in 10 PLHIV at the ART-sites will have mobile phones and only one in 10 will possess  
6 smartphones[45]. Thus, only up to 10% (or 60) of PLHIV with smartphones will be helped (with  
7 maximal support from peer supporters) to download Med Safety. The rest of the 540 PLHIV  
8 without smartphones or smartphone owners who will not install Med Safety will report ADRs  
9 by USSD or the traditional methods.  
10  
11

### 12 Study variables

13 *Primary outcomes:* Feasibility of the peer support intervention - attrition rate recorded as the  
14 number of study participants who remain in the study until the end of follow-up at 4 months;  
15 Number of suspected ADR reports submitted to NPC by PLHIV as measured by questionnaire  
16 and data abstracted from the national pharmacovigilance database at baseline and 4 months  
17  
18

### 19 *Other process/output/outcome variables:*

- 20 1. Acceptability of the peer support intervention measured using a questionnaire and  
21 qualitative interviews at 4 months post-intervention
- 22 2. Barriers/facilitators of the peer support intervention measured using a questionnaire  
23 during the intervention and qualitative interviews at 4 months post-intervention
- 24 3. Fidelity to the peer support intervention measured using a questionnaire and  
25 qualitative interviews at 4 months post-intervention
- 26 4. Rate of ADR-reporting to NPC by PLHIV as measured by questionnaire and data  
27 abstraction from the national pharmacovigilance database at baseline and 4 months
- 28 5. Quality of ADR-reports by PLHIV measured by questionnaire and data abstraction  
29 from the national pharmacovigilance database at baseline and 4 months
- 30 6. Time to ADR-reporting to NPC by PLHIV since enrolment measured by questionnaire  
31 and data abstraction from the national pharmacovigilance database during 4 months
- 32 7. Time from ADR onset to registration in the national pharmacovigilance database  
33 measured by questionnaire and data abstraction from the database during 4 months
- 34 8. Health-related quality of life measured by questionnaire at baseline and 4 months
- 35 9. Management of ADRs recorded using a questionnaire during the 4 months
- 36 10. Number of PLHIV linked to health facilities by peer supporters for ADR management  
37 as measured by questionnaire during the 4-month intervention period
- 38 11. Health-seeking behaviour measured using a questionnaire at baseline and 4 months
- 39 12. Self-efficacy measured by questionnaire at baseline and 4 months
- 40 13. Self-reported ART adherence measured by questionnaire at baseline and 4 months
- 41 14. Mood (positive/ negative affect) measured by questionnaire at baseline and 4 months

### 42 **Patient and Public Involvement**

43 Direct involvement of PLHIV in the detection and reporting of suspected ADRs, and patient  
44 safety groups in recruitment of PLHIV, will have value in improving the public's awareness of  
45 ADRs and the available pharmacovigilance tools (Med Safety, USSD, toll-free voice call, etc.).  
46 Together, these will be essential for ensuring that changes to clinical practice to promote  
47 patient safety based on our work are acceptable to the public.

48 The study team will work with PLHIV to assess whether the available pharmacovigilance  
49 tools meet their needs, to identify potential improvements and to understand facilitators and  
50 barriers to using these pharmacovigilance tools. Wider public input into the refinement of the  
51 tools and mechanisms to encourage uptake will add value to our work. This work will also be  
52  
53  
54  
55  
56  
57  
58  
59  
60

of value to the wider public as Med Safety can be used to report ADRs to any drug, and users can receive drug safety information directly from NPC.

## Data management and statistical analysis

### Quantitative data

**Data collection and management:** Baseline and end-line semi-structured questionnaires will be administered to the PLHIV and peer supporters (expert clients) in the intervention arm and PLHIV only in the comparison arm.

The baseline questionnaire will record socio-demographics (age, sex, monthly income, education level, residence) of all study participants. Clinical details (ART adherence; ADRs; ART-regimen; ART-status i.e. first-line, second-line, third-line; duration on ART; comorbidities) and healthcare-seeking behaviour of study PLHIV will be measured. Data will be transmitted to a password-protected online database via the Open Data Kit (ODK) suite of tools. Participating PLHIV will be asked at enrolment if they experienced suspected ADRs in the 4-months preceding the study; and their clinical charts will be reviewed for additional information regarding suspected ADRs. The clinical charts will be accessed by the health facility staff.

**Additional data collection for the intervention group:** On a weekly basis for up to 4-months, peer supporters will inquire from each assigned PLHIV (during a 1 hour face-to-face or phone call interaction) if one or more suspected ADR(s) was/were experienced and if the ADR had any impact on quality of life and/or ART adherence. Peer supporters will document if the ADR(s) was/were reported; and, if reported, by which means (Med Safety, USSD, voice call, other methods). Peer supporters will document all ADRs experienced by the PLHIV during the previous 1-week (using a tool designed to capture the medicines and ADRs); and will guide the PLHIV to report ADRs directly to NPC using the available pharmacovigilance methods. Active surveillance of ADRs linked to DTG and/or IPT will be prioritized but ADRs linked to other medicines will also be documented. We will document the management of serious and non-serious ADRs (number of serious and non-serious ADR cases referred for health facility management; actions taken by health facilities in the management of serious and non-serious ADRs e.g. stopping treatment, changing treatment, continuing treatment with adherence counselling, doing nothing, etc.).

The end-line questionnaire for PLHIV will measure their healthcare-seeking behaviour, linkage to care for ADR management and adherence to ART. The PLHIV will also be asked to report their experiences while receiving peer support to assess the intervention's feasibility and acceptability (e.g. user satisfaction). The study will also assess the participants' experiences when using the various pharmacovigilance methods (Med Safety, USSD, toll-free voice call, etc.). We shall assess the ease of use, language and costs of the available pharmacovigilance methods (Med Safety, USSD, toll-free voice call, etc) alongside peer support.

**Med Safety App and USSD data collection:** PLHIV will submit ADR-reports via Med Safety and/or USSD with initial assistance from peer supporters. Each app-based ADR-report will be automatically converted into the standard E2B (R2) format prior to its receipt in the Vigilance Hub[46]. The app is hosted by Uganda's NDA which manages the reported ADR data. For USSD reporting, PLHIV will dial the USSD code and answer a set of questions. The data will be stored in real-time on a dashboard accessible to the project staff.

**Statistical analysis:** All ADR-data in both the national and project databases and received from the study sites during the study period will be exported into Stata version 15.0 MP for

1  
2  
3 descriptive analysis – frequencies, proportions and their 95% confidence intervals (StataCorp  
4 LLC, College Station, Texas). Duplicate ADR-reports will be identified and analysed  
5 accordingly. Summary estimates will be reported by pharmacovigilance method (Med Safety,  
6 USSD, toll-free voice call, etc.).  
7

8  
9 To assess the feasibility to retain peer supporters and PLHIV, we shall compute the attrition  
10 rate which is the proportion of study participants who remain in the study until the end of follow-  
11 up at 4 months.  
12

13 The number of suspected ADRs reported to NPC by the PLHIV overall and in each study arm  
14 will be described by subgroup: serious ADR (yes/no); peer supporter guided (yes/no); DTG-  
15 linked (yes/no); IPT-linked (yes/no); DTG/IPT-linked (yes/no); linked to other medicines  
16 (yes/no); level of reporting (PLHIV, peer supporter, HCP, health facility) etc.  
17

18  
19 The rate of ADR-reporting ( $m_a$ ) by PLHIV (per site, overall) per completed-month ( $m_1$ ) of follow-  
20 up will be computed as follows:  $m_a = [n_a \text{ reports}/(N_a \text{ completed-months of follow-up})]$ , where  
21  $n_a$  is the number of reported ADRs and  $N_a$  the number of completed-months of follow-up.  
22 Reporting rates of same-day ADR-onsets will be documented; and time from ADR-onset to  
23 registration in the national database recorded for all other events[37]. Time to ADR-reporting  
24 to NPC for a PLHIV will be the time from the day a PLHIV is enrolled into the peer support  
25 intervention to the time he/she reports the first suspected ADR to NPC. Time-to-event data  
26 will be analysed by survival analysis techniques.  
27  
28

29 We will explore the influence of level of care on the uptake of the peer support intervention in  
30 Uganda's healthcare system - such as whether rolling it out at primary care facilities or tertiary  
31 hospitals influences uptake.  
32

33  
34 The change in outcome measures (e.g.) between pre- and post-intervention in PLHIV will be  
35 assessed using a linear mixed model with random effect for peer supporter. Random effect  
36 will be included to account for clustering of PLHIV with peer supporters. The ICC will be  
37 estimated from this model. Since supporters are a mixed population of expert clients and  
38 CHWs, a stratified analysis will be conducted. To aid the planning of future randomized  
39 controlled trials from this pilot's data, we shall report effect sizes.  
40

#### 41 Qualitative data

42 **Data collection:** Post-intervention, a combination of focus group discussions (FDGs), in-  
43 depth interviews (IDIs) and Key Informant Interviews (KIIs) will be conducted with purposively  
44 selected study participants. A lead qualitative researcher will be assisted by two well-trained  
45 research assistants. Semi-structured interviews informed by the Consolidated Framework for  
46 Implementation Research (CFIR)[47] will be used to elicit participants' perspectives on the  
47 facilitators and barriers to implementing the peer support intervention at four purposively  
48 selected health facilities.  
49  
50

51  
52 We will conduct six FGDs with three categories of PLHIV in the intervention arm; two with  
53 those enrolled in Community Drug Distribution Points (CDDPs), two in Community Client-Led  
54 ART Delivery (CCLAD) and two in facility-based ART delivery models.  
55

56  
57 A total of 12 IDIs will be conducted with peer supporters (expert clients, CHWs) attached to  
58 each of the three ART delivery models; a) CDDP, b) CCLAD, c) Facility-Based, see **Figure 5**.  
59  
60

1  
2  
3 Four KIIs will be conducted with HCPs/facility managers with insights in the implementation  
4 experience of the peer support intervention at their respective host facilities from an  
5 organizational-context.  
6

7  
8 As a first step, participants will complete a written informed consent form. We will then capture  
9 baseline characteristics: age, gender and educational level. A CFIR-informed semi-structured  
10 guide will be used for the interviews. The semi-structured guide will explore participants'  
11 experiences with the peer support intervention, their preferences and suggestions for  
12 improvement of the intervention and the challenges encountered in using USSD and/or Med  
13 Safety. On average, the duration of the FGDs and IDIs will be approximately 45-60 min. The  
14 FGDs, IDIs and KIIs will be conducted until theoretical saturation is reached. Theoretical  
15 saturation means that no new knowledge is generated and all aspects of a theory are covered.  
16 All the data generated from the focus groups and interviews will be explored for themes and  
17 sub-themes.  
18  
19

20  
21 **Guiding qualitative analytical framework:** The CFIR will be adopted as the overall guiding  
22 analytical framework for this study. The CFIR is a comprehensive 'meta-theoretical'  
23 implementation research framework compiled from more than 20 sources and is cross-cutting  
24 in more than 13 scientific disciplines; it guides systematic assessment of multi-level  
25 implementation settings to identify factors that influence intervention implementation and  
26 effectiveness [48]. The CFIR informs the conceptualization of this study, will guide the  
27 development of data collection tools and will serve as an overarching deductive thematic  
28 framework in analysis of study findings and the overall synthesis and interpretation of results  
29 for this study. The CFIR is widely-applied because of its multi-level, 'ecological' dimensions  
30 on multi-faceted influences on healthcare intervention implementation outcomes[49]. The  
31 CFIR has been applied across diverse interventions and varied content fields[48].  
32  
33

34  
35 More specifically, the CFIR-derived domains that will guide the study are the following:

36 *Intervention characteristics:* Implementation of the peer support intervention could potentially  
37 be impacted by factors including its perceived effectiveness in ADR-reporting, relative  
38 advantages over alternative reporting approaches, adaptability in varied resource-constrained  
39 settings, trialability, complexity, design quality and presentation, and cost-effectiveness.  
40

41 *Outer setting:* external influences on implementation of peer support may include external  
42 policies and incentives, socio-cultural belief systems, peer pressure dynamics and socio-  
43 economic context.  
44

45  
46 *Inner setting:* characteristics of the implementing organization (or host health facility) such as  
47 organizational culture, the relative priority assigned to the peer support intervention (including  
48 funding support), presence of intervention 'champions', availability of supportive administrative  
49 or physical infrastructure, congruence with host organization's mission and vision, quality of  
50 leadership support and implementation climate(s).  
51

52  
53 *Characteristics of individuals:* Patients' beliefs, knowledge, level of income, self-efficacy, and  
54 personal attributes that may affect the implementation and uptake of the peer support  
55 intervention.  
56

57  
58 *Process of implementation:* Influences on implementation outcomes may derive from different  
59 implementation phases involved in roll-out of the peer support strategy such as degree and  
60 quality of involvement of primary beneficiaries in designing the intervention, planning,



1  
2  
3 execution, degree of effectiveness of monitoring and evaluation strategies and presence of  
4 key intervention stakeholders and influencers including opinion leaders, stakeholder  
5 engagement, and intervention champions.  
6

7 The CFIR will be used to identify barriers and facilitators of the peer support intervention for  
8 promoting ADR-reporting by PLHIV.  
9

10 **Data analysis:** Our qualitative data analysis will follow the procedures recommended by Miles  
11 & Huberman (1994)[50]. Interviews and FGDs will be audio-recorded and transcribed verbatim  
12 into text transcripts by three research assistants (and translated into English where  
13 necessary). Data will be analysed, in an iterative process, involving four major steps:  
14  
15

16 a) *Data familiarization:* An experienced qualitative researcher and one other investigator will  
17 read the interview transcripts multiple times for data familiarization.  
18

19 b) *Developing a coding framework:* We shall adopt the five CFIR-derived domains  
20 (*Intervention characteristics, outer setting, inner setting, characteristics of individuals, and*  
21 *process of implementation*) as an overarching deductive thematic framework, combined with  
22 an inductive approach based on the data[51].  
23  
24

25 c) *Data abstraction:* The coded data will be categorized into thematic categories.  
26

27 d) *Overall interpretation and synthesis:* Our overall synthesis of study findings will adopt a  
28 team-based process of peer-debriefing involving all investigators to resolve disagreements in  
29 interpretation of study findings.  
30  
31

### 32 **Quality assurance**

33 To ensure uniform study procedures and high-quality data, all research assistants recruited  
34 for the study will receive face-to-face training on the following: the informed consent process,  
35 participant interviewing techniques, confidentiality issues, pharmacovigilance, use of the Med  
36 Safety App, use of the USSD, ADRs, use of the Open Data Kit (ODK) software for data entry  
37 into an online password-protected database; and qualitative and quantitative study designs,  
38 among others.  
39  
40

41 The FGDs and KIs will be led by an expert in qualitative research. Research assistants with  
42 prior training in qualitative research methods will also be hired for the qualitative study  
43 component. All research assistants will receive face-to-face training in both qualitative and  
44 quantitative research methods.  
45

46 Questionnaire data will be transmitted through ODK to an online database by the research  
47 assistants while still in the field. The study statistician will check the online data for integrity  
48 and contact field staff as soon as possible while still in the field to correct any data entry errors.  
49 Prior to entry into ODK, all research assistants shall be required to cross-check the data on  
50 study questionnaires to eliminate errors and ensure data completeness.  
51  
52

### 53 **Results uptake and use**

54 *Outcomes/Impact/Outreach:* The peer support intervention is expected to increase patient-  
55 reporting of ADRs to NPC. It is anticipated that the patients will subsequently; i) find it easier  
56 and faster to report ADRs (including DTG- and IPT-related reactions) anywhere and at any  
57 time using their mobile phones and, ii) receive medication-safety alerts directly from NPC on  
58 their phones. We expect this project to promote pharmacovigilance in Uganda by improving;  
59  
60

1  
2  
3 i) the exchange of medication-safety information between patients, peer supporters, HCPs  
4 and NPC, ii) the awareness of pharmacovigilance by patients and the public through the  
5 mobile phone and other awareness campaigns and, iii) the rate of ADR-reporting by patients.  
6

7  
8 *Potential impact on policy or programs:* This project could foster the increased involvement of  
9 patients in pharmacovigilance activities and improve the efficiency of pharmacovigilance  
10 systems in Uganda with real-time monitoring of DTG and INH safety in PLHIV in the first  
11 instance, thus, increasing the volume of analysable data for quick decision-making by both  
12 clinicians and policy makers.  
13

14 We expect to promote collaboration between consumers/public and the NPC, national AIDS  
15 Control Program - Ministry of Health and the National TB and Leprosy Control Programme  
16 (NTLP). The accumulation of relevant medication-safety data from spontaneous and active  
17 ADR-reports permits robust detection of safety signals at the national and international levels.  
18

19  
20 *Scalability:* After this pilot project, we expect the peer support intervention to be tested in a  
21 nationwide randomized controlled trial; and the USSD and Med Safety App to be modified  
22 accordingly and implemented at all 1,832 ART-sites in Uganda to complement the existing  
23 active and passive pharmacovigilance methods for ART and TB treatment. We hope to embed  
24 peer support in routine pharmacovigilance practice to promote the detection and reporting of  
25 ADRs by PLHIV in Uganda. The Med Safety App is available in English and will be  
26 subsequently translated into other local languages according to need.  
27

28  
29 The USSD and Med Safety are potentially invaluable tools for the pharmacovigilance of drugs  
30 used for other diseases e.g. non-communicable diseases like cancers, diabetes mellitus,  
31 hypertension etc.  
32

33  
34 Peer support, USSD and Med Safety will be scaled-up to support spontaneous ADR-reporting  
35 in both public and private health facilities at all levels of healthcare ranging from hospitals,  
36 medical centres and clinics to pharmacies and drug shops, not least, the general public.  
37

38  
39 The Med Safety-generated pharmacovigilance data at NPC could be linked with the patients'  
40 clinical data at ART-sites, stock consumption data from the Supply Management Chain  
41 system; and the electronic Health Management Information System. Machine learning/artificial  
42 intelligence analytical techniques could then be used on big data in the near future to foster  
43 improved systems.  
44

45  
46 *Sustainability:* Peer support to promote the detection and reporting of ADRs by PLHIV can be  
47 embedded in the HIV/AIDS program of Uganda just as community engagement programmes  
48 have been successful in Maternal and Child Health programmes; and are being rolled out in  
49 the COVID-19 Community Engagement Strategy and the Young people and Adolescent Peer  
50 Support Model for improving HIV care and treatment outcomes for Adolescents and young  
51 PLHIV of 2019 in Uganda[52, 53]. The USSD and Med Safety will be integrated into NPC's  
52 routine pharmacovigilance functions to complement existing pharmacovigilance methods.  
53 Regional pharmacovigilance centres have pharmacovigilance focal persons who will continue  
54 to support the NPC. All ADR-reports received by NPC are reviewed and submitted into an  
55 existing national medication-safety database. The equipped peer supporters are a valuable  
56 resource for scaling up peer support in the ART-sites after the study is concluded.  
57  
58  
59  
60

1  
2  
3 The USSD interface and Med Safety will be freely available. Med Safety can be downloaded  
4 and installed from both Google Play and Apple iOS stores. NPC pays the salaries of its full-  
5 time pharmacovigilance staff who receive and process the reported medication-safety data.  
6

7  
8 The research collaboration between Makerere University's Department of Pharmacology,  
9 Department of Pharmacy, NPC, ACP, MHRA and other stakeholders will continue to source  
10 for additional research grants to support the future scale-up of evidence-based digital  
11 pharmacovigilance in Uganda. The findings could be helpful to other countries to inform their  
12 own pharmacovigilance activities.  
13

### 14 **Dissemination**

15  
16 Med Safety users will immediately benefit from the app's two-way communication functionality  
17 as they will receive medication-safety alerts from NPC in addition to their submission to NPC  
18 of ADR-reports.  
19

20 We plan to present the project's research findings at local stakeholders' workshops organized  
21 to ensure the balanced representation of HCPs, administrators, policy makers, patient safety  
22 groups, the public and other local and international partners. At least one policy brief will be  
23 prepared from this work. We shall also disseminate the results at three or more local and  
24 international conferences, engage the public through local and international television  
25 channels, and through social media (Facebook, Twitter, WhatsApp, blogging etc.). We shall  
26 publish at least two manuscripts in internationally-recognized peer-reviewed journals.  
27  
28

### 29 **Ethical and environmental considerations**

30 The study received ethical approval from the School of Health Sciences Research and Ethics  
31 Committee at Makerere University College of Health Sciences (MAKSHSREC-2020-64); and  
32 was registered with the Uganda National Council for Science and Technology (HS1206ES).  
33 Administrative clearance will be obtained from participating ART-sites and written/thumb-  
34 printed informed consent from participating PLHIV and expert clients/CHWs. We consider the  
35 introduction of USSD and Med Safety for ADR-reporting to be a minimal risk intervention.  
36 However, we shall remind participants to mind their own confidentiality which could be lost  
37 due to phone sharing. On the contrary, participants in the intervention group could potentially  
38 benefit from peer-support. We received a waiver of consent from the ethics committee to  
39 access anonymized clinical and medication data of PLHIV at the health facilities. The data will  
40 be extracted by staff of the respective health facilities. Applicable international laws on data  
41 protection will be observed as well as the Data Protection and Privacy Act, 2019 of the  
42 Republic of Uganda[54].  
43  
44  
45  
46

### 47 **Risk management**

48 *Small number of patients ( $\leq 10\%$ ) expected to own functional smartphones:* Our main goal is  
49 to demonstrate that Med Safety can be downloaded and used by PLHIV, which we can  
50 achieve without the requirement for strict sample size and power calculations. Also, we shall  
51 use the USSD which can work on both basic low-tech mobile phones and high-tech  
52 smartphones.  
53

54 *Duplicate ADR-reports:* Duplicates will be identified by the NPC staff and study statistician.

55  
56  
57 *Loss to follow-up of peer supporters and PLHIV:* A major goal is to demonstrate the feasibility  
58 of peer support for PLHIV to get involved in ADR-reporting. The study will provide preliminary  
59 data on the magnitude of loss to follow-up to be expected in future studies.  
60

1  
2  
3 *Compromise in data quality by the research assistants:* The research assistants will be trained  
4 by the study team. Questionnaire data will be transmitted online immediately using ODK –  
5 thus giving a chance to the centrally located statistician to verify data integrity.  
6

7 *COVID-19:* We shall observe the SOPs of social distancing, washing hands and wearing  
8 masks by study participants and investigators to minimise the risk of spreading COVID-19.  
9 The pandemic could limit face-to-face contact but is also an opportunity to show how more  
10 remote engagement can support pharmacovigilance in a developing country setting. Remote  
11 engagement could be more cost-effective to support participants through phone calls and  
12 other forms of online interaction.  
13  
14

### 15 **Collaboration**

16 MHRA adapted Med Safety for Uganda with NDA's approval. The NPC staff at NDA, where  
17 NPC is located, will participate in this project. Involvement of the ACP in this  
18 pharmacovigilance project will promote the integration of peer support-driven  
19 pharmacovigilance in the HIV care and treatment programme of Uganda. The Department of  
20 Pharmacology & Therapeutics and Department of Pharmacy, Makerere University conceived  
21 this project and will coordinate the study. The WHO contracted MHRA to adapt the app for  
22 Uganda and will, together with UMC, provide technical support.  
23  
24

25 **Acknowledgements:** Uganda's National Drug Authority provided technical and logistical  
26 support during the planning phase of this project.  
27  
28

29 **Contributors:** RK, HZ, FK, SMN, JNS designed the study. RK drafted the manuscript. RK,  
30 HBN, VN, CK, HZ, SMN, JNS, PT, KH, AF, NI, SNP, CSM, MR, FK critically reviewed and  
31 revised the final version of the manuscript. All authors read and approved the final manuscript.  
32

33 **Funding:** This project was supported by the Special Program for Research and Training in  
34 Tropical Diseases (TDR), a co-sponsored program of the United Nations Children's Fund, the  
35 United Nations Development program, the World Bank, and the World Health Organization  
36 (No grant number). TDR funding was provided by governmental and co-sponsor core  
37 contributions to TDR.  
38

39 **Disclaimer:** A Fukushima, N Iessa, S Narayan Pal, CS Merle and ME Raguenaud are staff  
40 members of the WHO; the authors alone are responsible for the views expressed in this  
41 publication and they do not necessarily represent the decisions, policies or views of WHO.  
42

43 **Competing interests:** None declared.  
44

45 **Patient consent for publication:** Not required.  
46

47 **Provenance and peer review:** Not commissioned; externally peer reviewed.  
48

49 **Open access:** This is an open access article distributed in accordance with the Creative  
50 Commons Attribution Non-Commercial (CC BY-NC 4.0) license, which permits others to  
51 distribute, remix, adapt, build upon this work non-commercially,  
52 and license their derivative works on different terms, provided the original work is properly  
53 cited, appropriate credit is given, any changes made indicated, and the use is non-commercial.  
54 See: <http://creativecommons.org/licenses/by-nc/4.0/>.  
55  
56  
57  
58  
59  
60

## References

1. Johnson, J.A. and J.L. Bootman, *Drug-related morbidity and mortality and the economic impact of pharmaceutical care*. Am J Health Syst Pharm, 1997. **54**(5): p. 554-8.
2. Kiguba, R., C. Karamagi, and S.M. Bird, *Incidence, risk factors and risk prediction of hospital-acquired suspected adverse drug reactions: a prospective cohort of Ugandan inpatients*. BMJ Open, 2017. **7**(1): p. e010568.
3. Tumwikirize, W.A., et al., *Adverse drug reactions in patients admitted on internal medicine wards in a district and regional hospital in Uganda*. Afr Health Sci, 2011. **11**(1): p. 72-8.
4. Coleman, J.J. and S.K. Pontefract, *Adverse drug reactions*. Clin Med (Lond), 2016. **16**(5): p. 481-485.
5. Onakpoya, I.J., C.J. Heneghan, and J.K. Aronson, *Post-marketing withdrawal of 462 medicinal products because of adverse drug reactions: a systematic review of the world literature*. BMC Med, 2016. **14**: p. 10.
6. Bates, D.W., et al., *Incidence of adverse drug events and potential adverse drug events. Implications for prevention. ADE Prevention Study Group*. JAMA, 1995. **274**(1): p. 29-34.
7. Hazell, L. and S.A. Shakir, *Under-reporting of adverse drug reactions : a systematic review*. Drug Saf, 2006. **29**(5): p. 385-96.
8. Kiguba, R., et al., *Recognition and reporting of suspected adverse drug reactions by surveyed healthcare professionals in Uganda: key determinants*. BMJ Open, 2014. **4**(11): p. e005869.
9. Lopez-Gonzalez, E., M.T. Herdeiro, and A. Figueiras, *Determinants of under-reporting of adverse drug reactions: a systematic review*. Drug Saf, 2009. **32**(1): p. 19-31.
10. Defer, G., et al., *Adverse Drug Reaction Reporting Using a Mobile Device Application by Persons with Multiple Sclerosis: A Cluster Randomized Controlled Trial*. Drug Saf, 2021. **44**(2): p. 223-233.
11. Margraff, F. and D. Bertram, *Adverse drug reaction reporting by patients: an overview of fifty countries*. Drug Saf, 2014. **37**(6): p. 409-19.
12. Inácio, P., A. Cavaco, and M. Airaksinen, *The value of patient reporting to the pharmacovigilance system: a systematic review*. 2017. **83**(2): p. 227-246.
13. Avery, A.J., et al., *Evaluation of patient reporting of adverse drug reactions to the UK 'Yellow Card Scheme': literature review, descriptive and qualitative analyses, and questionnaire surveys*. Health Technol Assess, 2011. **15**(20): p. 1-234, iii-iv.
14. Ramlakhan, J.U., et al., *What constitutes patient-centred care for women: a theoretical rapid review*. Int J Equity Health, 2019. **18**(1): p. 182.
15. Ministry of Health Uganda. *Consolidated Guidelines for Prevention and Treatment of HIV in Uganda*. 2018 [cited 2019 19 September]; Available from: <http://library.health.go.ug/publications/hivaids/consolidated-guidelines-prevention-and-treatment-hiv-uganda>.
16. Ministry of Health Uganda, *Consolidated guidelines for the prevention and treatment of HIV and AIDS in Uganda Kampala, Uganda*. 2020, Ministry of Health Uganda.
17. GlaxoSmithKline. *Healthcare V. Tivicay (dolutegravir tablets)*. 2018 [cited 2021 28 May]; Available from: [https://www.gsksource.com/pharma/content/dam/GlaxoSmithKline/US/en/Prescribing\\_Information/Dovato/pdf/DOVATO-PI-PIL.PDF](https://www.gsksource.com/pharma/content/dam/GlaxoSmithKline/US/en/Prescribing_Information/Dovato/pdf/DOVATO-PI-PIL.PDF).
18. Elzi, L., et al., *Adverse events of raltegravir and dolutegravir*. AIDS, 2017. **31**(13): p. 1853-1858.
19. Hoffmann, C., et al., *Higher rates of neuropsychiatric adverse events leading to dolutegravir discontinuation in women and older patients*. HIV Med, 2017. **18**(1): p. 56-63.
20. Grant, A.D., et al., *Adverse events with isoniazid preventive therapy: experience from a large trial*. AIDS, 2010. **24** Suppl 5: p. S29-36.
21. Johnson, S., et al., *Peer-supported self-management for people discharged from a mental health crisis team: a randomised controlled trial*. Lancet, 2018. **392**(10145): p. 409-418.
22. Kong, L.N., et al., *The effectiveness of peer support on self-efficacy and quality of life in adults with type 2 diabetes: A systematic review and meta-analysis*. J Adv Nurs, 2019. **75**(4): p. 711-722.
23. Ammon, N., S. Mason, and J.M. Corkery, *Factors impacting antiretroviral therapy adherence among human immunodeficiency virus-positive adolescents in Sub-Saharan Africa: a systematic review*. Public Health, 2018. **157**: p. 20-31.
24. Snyder, K., et al., *Preliminary results from Hlanganani (Coming Together): A structured support group for HIV-infected adolescents piloted in Cape Town, South Africa*. Children and Youth Services Review, 2014. **45**: p. 114-121.

- 1  
2  
3 25. Genberg, B.L., et al., *Improving Engagement in the HIV Care Cascade: A Systematic Review of Interventions Involving People Living with HIV/AIDS as Peers*. *AIDS Behav*, 2016. **20**(10): p. 2452-2463.
- 4  
5  
6 26. Davidson, L., et al., *Peer support among adults with serious mental illness: a report from the field*. *Schizophr Bull*, 2006. **32**(3): p. 443-50.
- 7  
8 27. Lawn, S., A. Smith, and K. Hunter, *Mental health peer support for hospital avoidance and early discharge: An Australian example of consumer driven and operated service*. *Journal of Mental Health*, 2008. **17**(5): p. 498-508.
- 9  
10  
11 28. Ratzlaff, S., et al., *The Kansas Consumer as Provider program: measuring the effects of a supported education initiative*. *Psychiatr Rehabil J*, 2006. **29**(3): p. 174-82.
- 12  
13 29. Repper J, et al. *Peer support workers: theory and practice*. 2013 [cited 2021 28 May]; Available from: <https://www.centreformentalhealth.org.uk/publications/peer-support-workers-theory-and-practice>.
- 14  
15  
16 30. GSMA. *Low Tech, High Impact: USSD in the time of COVID-19*. 2020; Available from: <https://www.gsma.com/mobilefordevelopment/uncategorized/low-tech-high-impact-ussd-in-the-time-of-covid-19/>.
- 17  
18  
19 31. WEB-RADR. *Med Safety App*. Available from: <https://web-radr.eu/mobile-apps/med-safety/>.
- 20  
21 32. smsone. [cited 2021 26 July]; Available from: <https://smsone.co.ug/>.
- 22  
23 33. Ayo C. K., et al., *A prototype mobile money implementation in Nigeria*. *African Journal of Business Management*, 2012. **6**(6): p. 2195-2201.
- 24  
25 34. kolastudios. [cited 2021 26 July]; Available from: <https://kolastudios.com/#contact>.
- 26  
27 35. Ghosh, R. and D. Lewis, *Aims and approaches of Web-RADR: a consortium ensuring reliable ADR reporting via mobile devices and new insights from social media*. *Expert Opin Drug Saf*, 2015. **14**(12): p. 1845-53.
- 28  
29 36. Proctor, E., et al., *Outcomes for implementation research: conceptual distinctions, measurement challenges, and research agenda*. *Adm Policy Ment Health*, 2011. **38**(2): p. 65-76.
- 30  
31 37. Kiguba, R., et al., *Adverse Drug Reaction Onsets in Uganda's VigiBase((R)): Delayed International Visibility, Data Quality and Illustrative Signal Detection Analyses*. *Pharmaceut Med*, 2018. **32**(6): p. 413-427.
- 32  
33 38. CQUIN. *Differentiated Service Delivery in Uganda*. 2020; Available from: <https://cquin.icap.columbia.edu/the-work/uganda/>.
- 34  
35 39. Ministry of Health Uganda. *The 2019 HIV Epidemiological Surveillance Report for Uganda*. 2020; Available from: <https://www.health.go.ug/cause/the-2019-hiv-epidemiological-surveillance-report-for-uganda/>.
- 36  
37 40. PEPFAR. *PEPFAR Uganda Country Operational Plan (COP) 2019 Strategic Direction Summary April 12, 2019*. Available from: [https://www.state.gov/wp-content/uploads/2019/09/Uganda\\_COP19-Strategic-Direction-Summary\\_public.pdf](https://www.state.gov/wp-content/uploads/2019/09/Uganda_COP19-Strategic-Direction-Summary_public.pdf).
- 38  
39  
40 41. Levesque, J.-F., M.F. Harris, and G. Russell, *Patient-centred access to health care: conceptualising access at the interface of health systems and populations*. *International Journal for Equity in Health*, 2013. **12**(1): p. 18.
- 41  
42 42. Peers for Progress and National Council of La Raza. *Global Evidence for Peer Support; Humanizing healthcare*. Report from an International Conference [cited 2021 28 May]; Available from: <http://peersforprogress.org/>.
- 43  
44 43. Uganda National Council for Science and Technology. *National Guidelines for Research involving Humans as Research Participants*. 2014 [cited 2021 27 July]; Available from: [https://engage.avac.org/wp-content/uploads/grassblade/12230-testing-tincan/story\\_content/external\\_files/Uganda%202014%20National%20guidelines%20for%20research%20involving%20humans%20as%20research%20participants.pdf](https://engage.avac.org/wp-content/uploads/grassblade/12230-testing-tincan/story_content/external_files/Uganda%202014%20National%20guidelines%20for%20research%20involving%20humans%20as%20research%20participants.pdf).
- 45  
46  
47 44. Batista, C.J.B., et al., *The Brazilian experience of implementing the active pharmacovigilance of dolutegravir*. *Medicine (Baltimore)*, 2019. **98**(10): p. e14828.
- 48  
49 45. The Collaboration on International ICT Policy for East and Southern Africa. *National Information Technology Survey*. 2017 [cited 2021 28 May]; Available from: <https://www.nita.go.ug/sites/default/files/publications/National%20IT%20Survey%20April%2010th.pdf>.
- 50  
51  
52 46. Pierce, C.E., et al., *Recommendations on the Use of Mobile Applications for the Collection and Communication of Pharmaceutical Product Safety Information: Lessons from IMI WEB-RADR*. *Drug Saf*, 2019. **42**(4): p. 477-489.
- 53  
54  
55  
56  
57  
58  
59  
60

- 1  
2  
3 47. Damschroder, L.J., et al., *Fostering implementation of health services research findings into practice: a consolidated framework for advancing implementation science*. Implementation Science, 2009. **4**(1): p. 50.
- 4  
5  
6 48. Safaeinili, N., et al., *CFIR simplified: Pragmatic application of and adaptations to the Consolidated Framework for Implementation Research (CFIR) for evaluation of a patient-centered care transformation within a learning health system*. Learning Health Systems, 2020. **4**(1): p. e10201.
- 7  
8  
9  
10 49. Means, A.R., et al., *Evaluating and optimizing the consolidated framework for implementation research (CFIR) for use in low- and middle-income countries: a systematic review*. Implementation Science, 2020. **15**(1): p. 17.
- 11  
12  
13 50. Miles, M.B. and A.M. Huberman, *Qualitative data analysis: An expanded sourcebook, 2nd ed.* Qualitative data analysis: An expanded sourcebook, 2nd ed. 1994, Thousand Oaks, CA, US: Sage Publications, Inc. xiv, 338-xiv, 338.
- 14  
15  
16 51. Fereday, J. and E. Muir-Cochrane, *Demonstrating Rigor Using Thematic Analysis: A Hybrid Approach of Inductive and Deductive Coding and Theme Development*. International Journal of Qualitative Methods, 2006. **5**(1): p. 80-92.
- 17  
18  
19 52. Ministry of Health Uganda, *Young people and Adolescent Peer Support Model for improving HIV care and treatment outcomes for Adolescents and young PLHIV of 2019 in Uganda*. 2019.
- 20  
21 53. Ministry of Health Uganda. *Technical Inter-sectoral Committee on COVID-19; National Community Engagement Strategy for COVID-19 Response for Uganda*. 2020 [cited 2021 28 May]; Available from: <https://www.redcrossug.org/about/more-info/covid-19-community-engagement-strategy>.
- 22  
23  
24 54. Government of Uganda. *Data Protection and Privacy Act, 2019 of the Republic of Uganda*. 2019 [cited 2021 28 May]; Available from: <https://ict.go.ug> › wp-content › uploads › 2019/03.
- 25  
26  
27  
28  
29  
30  
31  
32  
33  
34  
35  
36  
37  
38  
39  
40  
41  
42  
43  
44  
45  
46  
47  
48  
49  
50  
51  
52  
53  
54  
55  
56  
57  
58  
59  
60

## Figures

**Figure 1.** Before-after and there-there quasi-experimental study design for a peer support intervention to improve adverse drug reaction reporting by people living with HIV in Uganda

**Figure 2:** Layers of supervision in the peer support mechanism

**Figure 3.** Four key functions of the humanizing healthcare model for peer support as adapted from the framework by Peers for Progress

**Figure 4.** Intervention and comparison groups with two-way comparisons (before-after for each group (A&C, B&D), and between groups after intervention (C&D).

**Figure 5.** The five Differentiated Service Delivery models of HIV and TB care in Uganda, 2017.

For peer review only



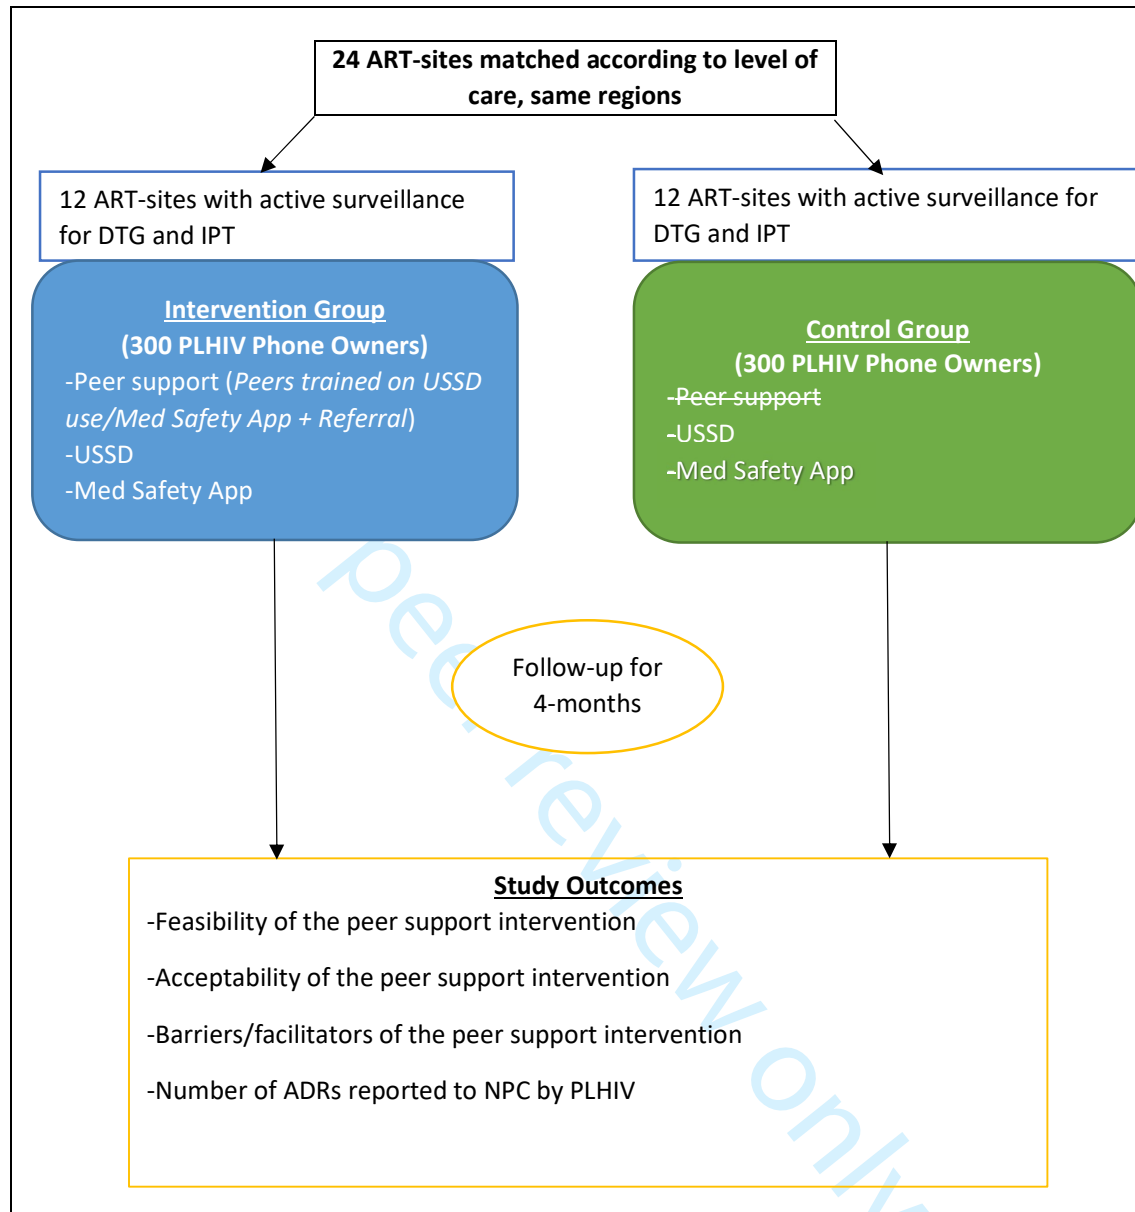

43  
44  
45  
46  
47  
48  
49  
50  
51  
52  
53  
54  
55  
56  
57  
58  
59  
60

**Figure 1.** Before-after and there-there quasi-experimental study design for a peer support intervention to improve adverse drug reaction reporting by people living with HIV in Uganda

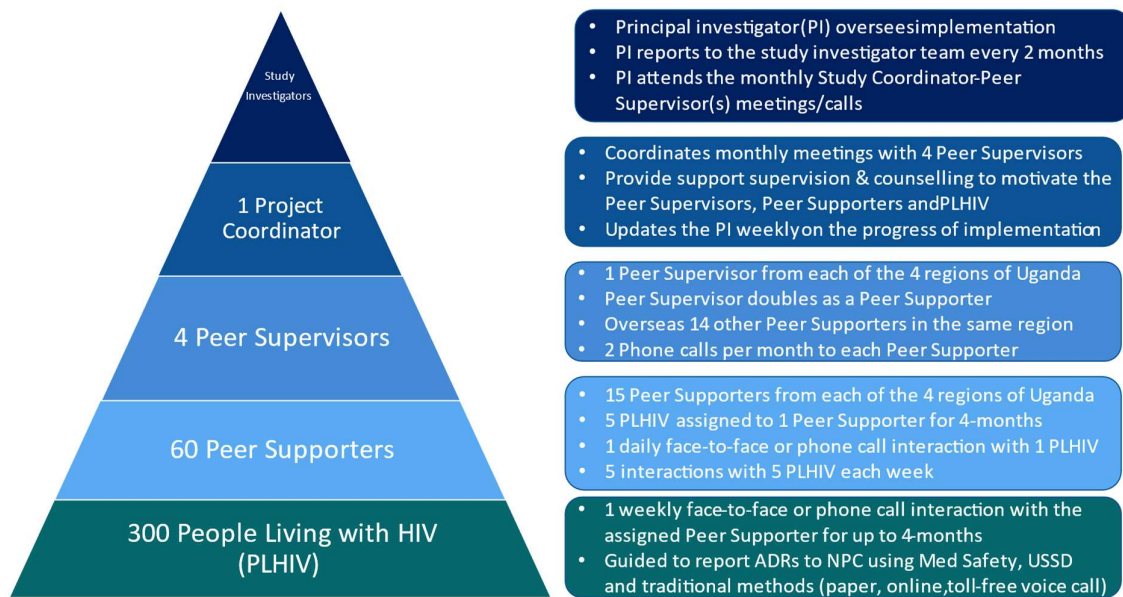

**Figure 2.** Layers of supervision in the peer support mechanism

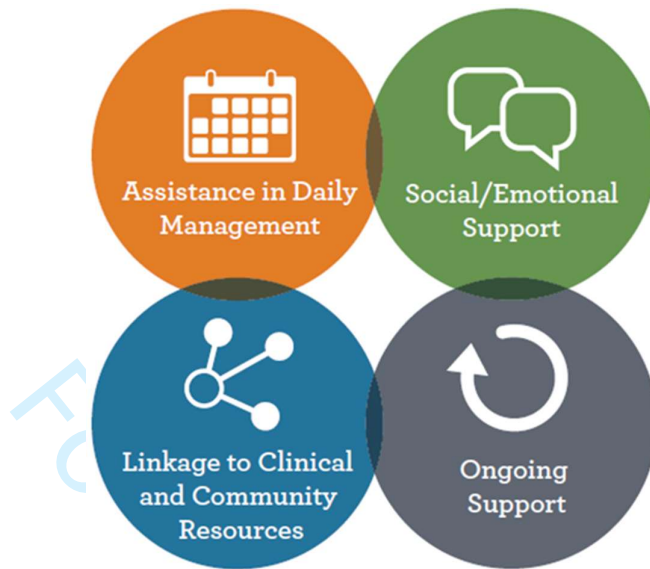

23 *Source: Peers for Progress, Global Evidence for Peer Support; Humanizing Healthcare (September 2014)*

24 **Figure 3.** Four key functions of the humanizing healthcare model for peer support as adapted from  
25 the framework by Peers for Progress  
26  
27  
28  
29  
30  
31  
32  
33  
34  
35  
36  
37  
38  
39  
40  
41  
42  
43  
44  
45  
46  
47  
48  
49  
50  
51  
52  
53  
54  
55  
56  
57  
58  
59  
60

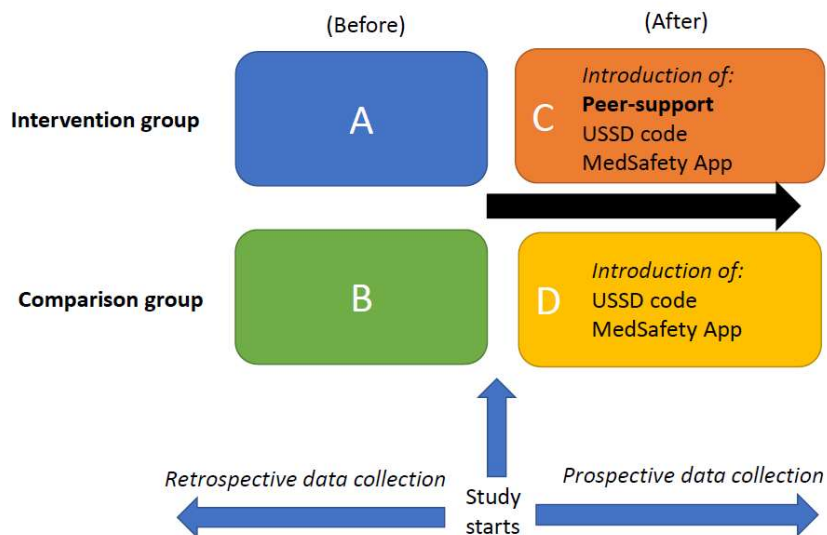

**Figure 4.** Intervention and comparison groups with two-way comparisons (before-after for each group (A&C, B&D), and between groups after intervention (C&D)).

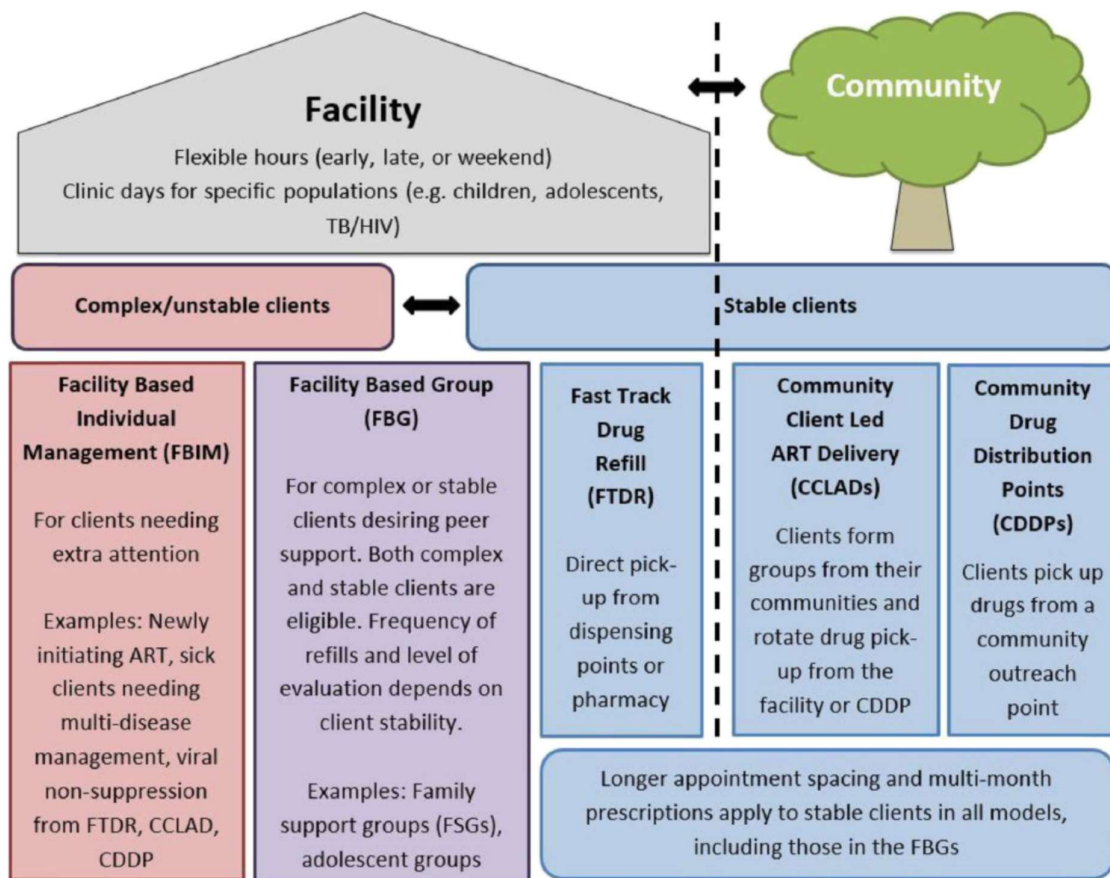

Source: Ministry of Health, *Implementation Guide for Differentiated TB Services in Uganda* (June 2017).

**Figure 5.** The five Differentiated Service Delivery models of HIV and TB care in Uganda, 2017.

# BMJ Open

## Implementation of a peer support intervention to promote the detection, reporting and management of adverse drug reactions in people living with HIV in Uganda: a protocol for a quasi-experimental study

|                                 |                                                                                                                                                                                                                                                                                                                                                                                                                                                                                                                                                                                                                                                                                                                                                                                                                                                                                                                                                                                                                                       |
|---------------------------------|---------------------------------------------------------------------------------------------------------------------------------------------------------------------------------------------------------------------------------------------------------------------------------------------------------------------------------------------------------------------------------------------------------------------------------------------------------------------------------------------------------------------------------------------------------------------------------------------------------------------------------------------------------------------------------------------------------------------------------------------------------------------------------------------------------------------------------------------------------------------------------------------------------------------------------------------------------------------------------------------------------------------------------------|
| Journal:                        | <i>BMJ Open</i>                                                                                                                                                                                                                                                                                                                                                                                                                                                                                                                                                                                                                                                                                                                                                                                                                                                                                                                                                                                                                       |
| Manuscript ID                   | bmjopen-2021-056039.R1                                                                                                                                                                                                                                                                                                                                                                                                                                                                                                                                                                                                                                                                                                                                                                                                                                                                                                                                                                                                                |
| Article Type:                   | Protocol                                                                                                                                                                                                                                                                                                                                                                                                                                                                                                                                                                                                                                                                                                                                                                                                                                                                                                                                                                                                                              |
| Date Submitted by the Author:   | 09-Jan-2022                                                                                                                                                                                                                                                                                                                                                                                                                                                                                                                                                                                                                                                                                                                                                                                                                                                                                                                                                                                                                           |
| Complete List of Authors:       | Kiguba, Ronald; Makerere University College of Health Sciences, Pharmacology and Therapeutics<br>Ndagije, Helen ; National Drug Authority, Directorate of Product Safety<br>Nambasa, Victoria; National Drug Authority, Directorate of Product Safety<br>Katureebe, Cordelia; Ministry of Health, AIDS Control Programme<br>Zakumumpa, Henry; Makerere University College of Health Sciences<br>Nanyonga, Stella; Makerere University College of Health Sciences<br>Ssanyu, Jacquelyn ; Makerere University College of Health Sciences, Department of Pharmacy<br>Tregunno, Phil; Medicines and Healthcare Products Regulatory Agency<br>Harrison, Kendal; Medicines and Healthcare Products Regulatory Agency<br>Merle, Corinne; World Health Organization, Special Programme for Research & Training In Tropical Diseases (TDR)<br>Raguenaud, Marie-eve; World Health Organization, Special Programme for Research & Training In Tropical Diseases (TDR)<br>Kitutu, Freddy; Makerere University School of Health Sciences, Pharmacy |
| <b>Primary Subject Heading</b>: | Pharmacology and therapeutics                                                                                                                                                                                                                                                                                                                                                                                                                                                                                                                                                                                                                                                                                                                                                                                                                                                                                                                                                                                                         |
| Secondary Subject Heading:      | Epidemiology, HIV/AIDS, Patient-centred medicine, Qualitative research                                                                                                                                                                                                                                                                                                                                                                                                                                                                                                                                                                                                                                                                                                                                                                                                                                                                                                                                                                |
| Keywords:                       | Adverse events < THERAPEUTICS, SOCIAL MEDICINE, Epidemiology < INFECTIOUS DISEASES, Pharmacology < TROPICAL MEDICINE                                                                                                                                                                                                                                                                                                                                                                                                                                                                                                                                                                                                                                                                                                                                                                                                                                                                                                                  |
|                                 |                                                                                                                                                                                                                                                                                                                                                                                                                                                                                                                                                                                                                                                                                                                                                                                                                                                                                                                                                                                                                                       |

SCHOLARONE™  
Manuscripts

1  
2  
3 **Implementation of a peer support intervention to promote the detection,**  
4 **reporting and management of adverse drug reactions in people living with HIV**  
5 **in Uganda: a protocol for a quasi-experimental study**  
6  
7  
8

9 **Authors:**

10 *Ronald Kiguba<sup>1\*</sup>, Helen B. Ndagije<sup>2</sup>, Victoria Nambasa<sup>2</sup>, Cordelia Katureebe<sup>3</sup>, Henry*  
11 *Zakumumpa<sup>4</sup>, Stella Nanyonga<sup>5</sup>, Jacquellyn Nambi Ssanyu<sup>6</sup>, Phil Tregunno<sup>7</sup>, Kendal*  
12 *Harrison<sup>7</sup>, Corinne S Merle<sup>8</sup>, Marie-eve Raguenaud<sup>8</sup>, Freddy Eric Kitutu<sup>6</sup>*  
13  
14

15 \*Correspondence to: Ronald Kiguba (Tel: +256 701 840683; Email: [kiguba@gmail.com](mailto:kiguba@gmail.com))  
16

17 **Affiliations:**

18  
19 <sup>1</sup>Department of Pharmacology and Therapeutics, Makerere University College of Health  
20 Sciences, Kampala, Uganda  
21

22 <sup>2</sup>National Pharmacovigilance Centre, National Drug Authority, Kampala, Uganda  
23

24 <sup>3</sup>AIDS Control Programme, Ministry of Health, Kampala, Uganda  
25

26 <sup>4</sup>School of Public Health, Makerere University College of Health Sciences, Kampala, Uganda  
27

28 <sup>5</sup>Clinical Epidemiology Unit, Makerere University College of Health Sciences, Kampala,  
29 Uganda  
30

31 <sup>6</sup>Sustainable Pharmaceutical Systems (SPS) unit, Department of Pharmacy, School of  
32 Health Sciences, Makerere University College of Health Sciences, Kampala, Uganda  
33

34 <sup>7</sup>Medicines and Healthcare products Regulatory Agency, London, United Kingdom  
35

36 <sup>8</sup>The Special Programme for Research & Training in Tropical Diseases (TDR), World Health  
37 Organization, Geneva, Switzerland  
38  
39  
40  
41  
42  
43  
44  
45  
46  
47  
48  
49  
50  
51  
52  
53  
54  
55  
56  
57  
58  
59  
60

## Abstract

**Introduction:** Patients have contributed <1% of all spontaneous adverse drug reaction (ADR) reports in Uganda's pharmacovigilance database. Peer support combined with mobile technologies could empower people living with HIV (PLHIV) to report ADRs and improve ADR management through linkage to care. We seek to test the feasibility and effect of a peer support intervention on ADR-reporting by PLHIV receiving dolutegravir (DTG)-based antiretroviral therapy (ART) and/or Isoniazid Preventive Therapy (IPT) in Uganda; identify barriers and facilitators to implementing this intervention; and characterise ADR-reporting and management.

**Methods and analysis:** A quasi-experimental study with both quantitative and qualitative methods will be implemented over 4-months at 12 intervention and 12 comparison ART-sites selected from four geographical regions of Uganda. From each region, two blocks each consisting of a tertiary care, secondary care and primary care ART-site will be selected by simple random sampling. In each of the four regions, one block of ART-sites will be enrolled into the intervention arm and the other block into the comparison arm.

The study units include ART-sites and PLHIV on DTG-based ART and/or IPT in both arms. The intervention arm will have peer supporters who will be expert clients from among PLHIV and/or recognized community health workers. PLHIV at intervention sites will be assigned to peer supporters to empower them to report ADRs directly to the National Pharmacovigilance Centre (NPC).

Direct patient-reporting of ADRs to NPC in both arms will leverage the Med Safety App and toll-free Unstructured Supplementary Service Data interface to augment traditional pharmacovigilance methods.

**Ethics and dissemination:** The study received ethical approval from the School of Health Sciences Research and Ethics Committee at Makerere University College of Health Sciences (MAKSHSREC-2020-64) and administrative clearance from Uganda National Council for Science and Technology (HS1206ES). The results will be shared with PLHIV, policy-makers, the public and academia. [299 words].

**Trial registration:** ISRCTN75989485



### Strengths and limitations of the study

The study will blend a novel peer support intervention with mobile data transmission technologies to promote the detection and reporting of suspected adverse drug reactions (ADRs) by people living with HIV

People living with HIV who experience serious ADRs will be linked directly to health facilities for ADR management

An implementation research approach will be employed to identify the factors that could influence the uptake of peer support in patient-reporting of ADRs while documenting predefined outputs and outcomes relevant to the research objectives

The study will generate pilot data on effect sizes to aid the planning of future randomized controlled trials using peer support to promote patient-reporting of ADRs

For peer review only

## Introduction

Adverse drug reactions (ADRs) are a leading cause of morbidity, mortality and increased healthcare costs[1-3]. The timely detection and reporting of ADRs promotes their appropriate management, more accurate prediction and prevention[4]. Pharmacovigilance systems worldwide have identified and led to withdrawal from the market of at least 462 harmful medicines, primarily through passive spontaneous ADR-reporting by healthcare professionals (HCPs)[5], thereby contributing to patient safety. The major drawback of the spontaneous pharmacovigilance system is its reliance on individual HCP motivation. It is estimated that only about 10% of ADRs are reported through the spontaneous pharmacovigilance system, which is a very low rate of ADR-reporting[6-8]. Several factors hinder ADR-reporting by HCPs including medical specialty, lower-level healthcare facility, older HCP age, heavy workloads, shortage of reporting tools, ignorance and fear of litigation[8, 9].

Patient-reporting of suspected ADRs is given little attention in developing countries. Yet, patients are a known complementary source of pharmacovigilance data[10-12]. Patients can make detailed ADR-reports and with similar quality as ADR-reports from HCPs. Patients can also report previously unknown ADRs[13]. Thus, patients are well-placed to participate in ADR-reporting because they have first-hand experience of their own state of health and treatment. Patient involvement in ADR-reporting aligns with the increasing global momentum towards patient-centred healthcare[14]. Yet, patient participation in pharmacovigilance is under-explored with little empirical data, especially in low- and middle-income countries (LMICs). In Uganda, patients' contribution to ADR-reporting is very low indeed and is estimated at less than 1% of the reports in the national pharmacovigilance database (Victoria Nambasa, Pharmacovigilance Manager at National Drug Authority (NDA); personal communication; 6 April 2020).

The quest for expanded avenues to increase the reporting of suspected ADRs has never been more apparent than in Uganda where dolutegravir (DTG) and Isoniazid Preventive Therapy (IPT) have been massively rolled-out since 2018 and 2019, respectively. Anecdotal evidence in Uganda suggests that increased use of DTG and IPT has increased the burden of associated serious ADRs e.g. hyperglycaemia, hepatotoxicity and neuropsychiatric effects[15, 16]; necessitating a more robust pharmacovigilance system that leverages patient-reporting of suspected ADRs to DTG-regimens and/or IPT. This study proposes to test the feasibility and effect of a peer support intervention combined with mobile phone-based tools to promote the reporting of ADRs by people living with HIV (PLHIV) on DTG-based ART and/or IPT in Uganda. If successful, this study will contribute to the development of a more robust pharmacovigilance system to better document serious ADRs in Uganda.

Patient-centred peer support has shown promise in the management of chronic illnesses such as diabetes and mental health[17, 18]; and in improving retention in HIV care and adherence to ART[19, 20]. Thus, peer support could substantially promote the detection, reporting and management of ADRs amongst PLHIV. In the current study, peer support is based on the premise that PLHIV who have previously experienced ADRs linked to ART can – as peer supporters - encourage, mentor and support other similarly affected but less experienced PLHIV to detect and report ADRs[21]. Peer supporters could serve as positive role models to improve the self-efficacy of other PLHIV whom they could guide to identify and report ADRs using the available tools. Direct patient-reporting of ADRs could utilize the Med Safety mobile application, a toll-free Unstructured Supplementary Service Data (USSD) interface and the

1  
2  
3 traditional pharmacovigilance methods of paper-form, online forms and voice call. The aim  
4 remains to have all suspected ADR reports submitted to the National Pharmacovigilance  
5 Centre (NPC) database for analysis and subsequent processing. However, those that require  
6 clinical management should be brought to the attention of the HCP for appropriate  
7 management and prevention[21-23]. From guiding less experienced PLHIV, expert clients  
8 serving as peer supporters could equally be empowered to build their own self-esteem[24,  
9 25].  
10  
11

12 Our peer support intervention for strengthening the Ugandan pharmacovigilance system  
13 through patient-reporting of ADRs is intended to leverage the available mobile technologies  
14 e.g. the USSD platform available for both low-tech non-smartphones and high-tech  
15 smartphones[26]; and the Med Safety mobile application for high-tech smartphones[27].  
16 USSD is a real-time text-driven technology which allows users to interact directly from their  
17 mobile phones by making a selection from a menu. It allows for faster two-way communication  
18 of information and enables rapid exchange of data - up to seven times faster than SMS[28].  
19 The USSD interface has been a key success factor in the extensive penetration of mobile  
20 money banking in rural unbanked sub-Saharan Africa[29]. No Internet connection is needed.  
21 This project's toll-free USSD code has been developed by a private Ugandan software  
22 company[30]. Med Safety is a smartphone mobile application for ADR-reporting that was  
23 recently adapted for LMICs from the prototype app funded by the European Union's Innovative  
24 Medicines Initiative – the WEB-RADR project. Adaptation of the mobile app is led by UK's  
25 Medicines and Healthcare products Regulatory Agency in collaboration with World Health  
26 Organization (WHO) and the WHO Collaborating Centre for International Drug Monitoring, the  
27 Uppsala Monitoring Centre (UMC)[31]. Med Safety was launched in Uganda in February 2020.  
28 Using both USSD and Med Safety alongside existing pharmacovigilance methods could  
29 strengthen peer support-enhanced patient-driven pharmacovigilance in Uganda.  
30  
31  
32  
33  
34

35 Lastly, the study will use an implementation science approach to evaluate the peer support  
36 intervention among PLHIV. Implementation research is critical in identifying factors that could  
37 influence uptake of the intervention while documenting predefined outputs and outcomes  
38 relevant to the research objectives[32]. Our ultimate goal is to increase patient reporting of  
39 ADRs in LMICs such as Uganda with weak pharmacovigilance systems. Hence, this study  
40 aims to develop and assess the feasibility of a peer support intervention combined with mobile  
41 phone-based tools to promote the detection and reporting of ADRs in PLHIV on DTG-based  
42 ART and/or IPT in Uganda. It will identify the barriers and facilitators to implementing the  
43 intervention, characterise ADR-reporting and management and estimate the effect of the  
44 intervention on ADR-reporting among PLHIV.  
45  
46  
47

## 48 **Research hypotheses and objectives**

### 49 Research hypotheses:

50 We hypothesize that the patient-centred peer support intervention combined with existing  
51 mobile data transmission technologies for promoting the detection, reporting and management  
52 of ADRs in PLHIV is feasible and acceptable. We also hypothesize that this peer support  
53 intervention combined with mobile data transmission technologies will significantly increase  
54 the number of ADR reports submitted to NPC by PLHIV who receive the intervention during  
55 4-months of follow-up when compared with PLHIV who do not receive the intervention.  
56  
57

### 58 Specific objectives:

1. To develop a peer support intervention combined with mobile data transmission technologies to promote the detection, reporting and management of ADRs in PLHIV receiving DTG and/or IPT in Uganda
2. To explore the barriers and facilitators to implementation of the peer support intervention combined with mobile data transmission technologies to promote ADR detection, reporting and management among PLHIV on DTG and/or IPT in Uganda
3. To describe the patterns of ADR-reporting (number, rate, quality, time to reporting, seriousness etc.) by PLHIV receiving DTG and/or IPT in whom the peer support intervention combined with mobile data transmission technologies is implemented in Uganda
4. To estimate the effect of the peer support intervention combined with mobile data transmission technologies on the rate of ADR-reporting by PLHIV receiving DTG and/or IPT in Uganda

## Methods

### Study setting

Uganda has a tiered healthcare system with different levels of healthcare from the National Referral Hospitals which provide tertiary and super-specialized healthcare, through Regional Referral Hospitals (RRHs), General Hospitals, level IV Health Centers (HC IV), level III Health Centers (HC III), to level II Health Centers (HC II) that progressively offer less scope and breadth of health services to out-patient services[33]. HIV treatment and care is provided from HC III and upwards giving a total of 1,832 accredited centers that provide ART services in Uganda. Uganda adopted the Differentiated Service Delivery Models (DSDM), where stable clients have less frequent clinical assessment visits. In 2019, about 80% (1,466/1,832) of the ART accredited sites and 78% (975,675/1,241,478) of PLHIV on ART had access to the DSDM model. An additional, 12% (114,363/975,675) of clients enrolled on DSDM received ART services from the community through Community Drug Distribution Points (CDDP) and Community Client-Led ART Distribution (CCLAD)[34].

Uganda has an estimated 1.46 million PLHIV, of whom prevalence among people aged 15 to 49 years is 5.8% with women having a higher prevalence (7.1%) than men (4.3%). Among the PLHIV, 93% are aged  $\geq 15$  years and 60% of the HIV-infected adults are women. In 2019, there were 53,413 new HIV infections of which 40,000 were among adults and 21,000 Ugandans died of AIDS-related illnesses[35]. Following the "Test and Treat" policy for HIV adopted in 2016 and scaled up in 2017, the ART coverage was at 89% in 2019. Approximately 96% of PLHIV on ART are taking first-line regimens and >443,000 PLHIV are on TLD. About 17% of PLHIV are ART-naïve at treatment initiation. In 2019, about 41% of TB patients were HIV-positive and 97% of HIV-positive TB patients were receiving ART[35, 36]. By the end of 2019, 477,190 of PLHIV were enrolled on IPT. Strategies to strengthen pharmacovigilance were instituted as part of DTG/IPT roll-out in the 2020 revised Consolidated Guidelines for Prevention and Treatment of HIV and AIDS in Uganda[16]. The guidelines support ADR identification, monitoring and reporting, particularly for DTG and IPT. Pharmacovigilance sentinel sites were established at 18 sentinel sites (RRHs and Centers of Excellence). These ART-sites received training and ADR-reporting tools. ADRs are reported to the NPC at NDA through a paper-based system, online system, toll-free phone line or through NDA's Med Safety App.

For the current study, the authors have divided the country into four geographical regions to establish a sampling framework that leads to selection of national level representation of health facilities and factors that influence provision of care to PLHIV and their pharmacovigilance-related needs. In each region, two blocks of health facilities with ART-sites will be selected of which one block will implement the intervention and the other will serve as the comparison block of health facilities. Each block will consist of an ART-site at a RRH (tertiary care), a HC IV (secondary care) and HC III (primary care), respectively. Therefore, 12 intervention ART-sites will be matched by level of care and region with 12 comparison ART-sites from the four regions of Uganda.

### Study design

The study will employ a quasi-experimental design with pre-post and there-there comparisons to measure the preliminary impact of the peer support intervention on ADR-reporting by PLHIV, **Figure 1**. The study will use both quantitative and qualitative methods to triangulate the research findings. The qualitative research methods aim to understand the barriers and

1  
2  
3 facilitators to implementing the peer support intervention for promoting ADR detection,  
4 reporting and management from the perspective of PLHIV and in the context of their interface  
5 with Uganda's healthcare system[37] and thus they will be predominantly implemented in the  
6 intervention arm. We will explore the experiences of PLHIV in the utilization of the peer support  
7 intervention and elicit their preferences to further refine the intervention and implementation  
8 strategy.  
9

### 10 11 The intervention

12 The peer support intervention leverages mobile data transmission technologies (Med Safety,  
13 USSD) in addition to traditional pharmacovigilance methods (paper, online, voice call). The  
14 peer support mechanism has several layers of supervision from the mentored PLHIV, through  
15 peer supporters, peer supervisors, study coordinator to study investigators at the top of the  
16 hierarchy, see **Figure 2**.  
17  
18

19 The PLHIV to be mentored in the intervention arm will be assigned to peer supporters to guide  
20 their ART care for 4-months. The peer supporters will constitute a mixed group of lay people,  
21 namely; i) expert clients who are PLHIV with more experience in the use of ART and, ii)  
22 recognized community health workers (CHWs). Most CHWs in Uganda's HIV programs are  
23 expert clients. Thus, it is possible to recruit CHWs all of whom are expert clients. Peer  
24 supporters in the intervention arm will guide the mentored PLHIV to report ADRs to NPC and  
25 improve the latter's healthcare-seeking behaviour. The PLHIV should own mobile phones.  
26  
27

28 The PLHIV to be mentored will be identified by verbal communication/ written announcements  
29 on noticeboards at the study sites and matched with the respective peer supporters of similar  
30 age, gender and proximity of residence. The non-random matching of PLHIV to peer  
31 supporters is intended to promote easier and faster bonding of the peer-relationships. Five (5)  
32 PLHIV will be assigned to one (1) peer supporter from the same community. A weekly  
33 (minimum fortnightly) face-to-face/phone call interaction will be held between a peer supporter  
34 and each assigned PLHIV. Thus, a peer supporter will be expected to interact with one PLHIV  
35 per day and five PLHIV in five days each week. Each PLHIV to be supported will be introduced  
36 to an assigned PLHIV by the research team and focal health facility staff. The procedure for  
37 the weekly interaction will be illustrated to the PLHIV-peer supporter pair. The mentored PLHIV  
38 and peer supporter will be provided with the telephone contacts of the study coordinator/ focal  
39 health facility staff whom they could notify at any time when they want to terminate  
40 engagement.  
41  
42  
43  
44

45 Peer supporters will use one-on-one in-person support blended with mobile phone-based  
46 interaction to guide each assigned PLHIV to recognize and report suspected ADRs to NPC.  
47 The peer supporter will also administer a short weekly questionnaire to each assigned PLHIV  
48 regarding ADR experience in the past 1-week.  
49

50 This peer support intervention adapts the "humanizing healthcare model" developed by *peers*  
51 *for progress*, a group that demonstrates the value and best practices of peer support. The  
52 model is based on four functions, namely; assistance in daily management, providing social  
53 and emotional support, linking to clinical and community resources and ongoing support[38],  
54 see **Figure 3**.  
55  
56

57 Both the supported PLHIV and peer supporters will be trained on the following aspects: ART;  
58 how to live positively with HIV; recognition of suspected ADRs and how to report them via Med  
59  
60

1  
2  
3 Safety, USSD or traditional methods (paper, online, voice call) to NPC; and about linkage or  
4 referral to health facility care e.g. when a serious ADR occurs. The supported PLHIV and peer-  
5 supporters will be trained to interact in a manner that ensures confidentiality. The data  
6 generated from Med Safety and USSD will be safeguarded according to applicable laws on  
7 data protection. The linkage to appropriate care of PLHIV by the peer supporter will aim to; i)  
8 promote healthcare-seeking behaviour of the PLHIV, ii) improve the monitoring of HIV  
9 treatment (management of serious ADRs, ART adherence, retention in care), iii) enhance  
10 timely refill of ART prescriptions and/or, iv) provide for any other special care that PLHIV might  
11 require.  
12  
13

14  
15 Peer supporters will be separately trained and skilled in interpersonal interaction to be  
16 responsive to PLHIV and encourage them to identify and report any suspected ADRs. The  
17 training components for peer supporters will include care in chronic illness, ART, adherence  
18 to ART, ADRs, ADR-reporting, care-seeking, counselling and facilitative supervision. Training  
19 for the peer supporters will take up to three days. It will include a one-day didactic session  
20 followed by two days of on-the-job, one-on-one training. In addition to being trained, peer  
21 supporters will receive supplementary educational materials. Four follow-up  
22 supervisory visits/phone calls at two-week intervals will be conducted by the trainers to  
23 reinforce the knowledge, skills and attitudes gained by the peer supporters. Each supported  
24 PLHIV will receive one-day's training during his/her clinic visit which will include a didactic  
25 session and one-on-one discussion in a non-classroom environment. The trainers will be  
26 qualified individuals carefully identified by the project team with the requisite knowledge to  
27 offer the training and expertise in adult learning and counselling.  
28  
29  
30

31 The peer support mechanism will have two additional layers of supervision, see **Figure 2**. The  
32 first level of additional oversight will be provided by four (4) peer supervisors identified from  
33 among the peer supporters at each of the four selected RRHs. Peer supervisors will be  
34 seconded by the study sites and collaborating patient safety groups involved in the recruitment  
35 of peer supporters. Each peer supervisor will oversee 15 peer supporters in his/her region (10  
36 from RRH, 3 from HC IV, 2 from HC III). The peer supervisor will call each peer supporter  
37 twice a month. During these 'booster' sessions, the peer supervisor will review, emphasize  
38 and re-educate peer supporters on expectations of the intervention e.g. setting and reviewing  
39 goals with PLHIV. The second level of oversight will be provided by the project coordinator  
40 who will oversee the four (4) peer supervisors whom he/she will meet/call every month. At  
41 least one study investigator, mostly the principal investigator, will participate in these  
42 meetings/calls. The project coordinator will have the requisite knowledge, skills and  
43 competence to train PLHIV and peer supporters. The project coordinator will provide support  
44 supervision and counselling to motivate the peer supervisors, peer supporters and PLHIV.  
45  
46  
47  
48  
49

#### 50 The comparison group

51 PLHIV in the comparison group will be mobile phone owners who will be trained to recognize  
52 suspected ADRs and report them to NPC via Med Safety, USSD or the traditional  
53 pharmacovigilance methods (paper, online, toll-free voice call) to a peer-supporter, HCP or  
54 NPC, see **Figure 4**. Smartphone owners will be guided to install Med Safety for ADR-reporting.  
55 PLHIV with non-smartphones or smartphone owners who will not install Med Safety will report  
56 ADRs by USSD or the traditional reporting methods. PLHIV in this group will not receive  
57 dedicated peer support.  
58  
59

#### 60 Study units, participants and selection

### Study units and participants:

This study has multiple study units and layers to assess the feasibility of implementation and effect of the intervention on promoting the detection and reporting of suspected ADRs in PLHIV on DTG-based ART and/or IPT in Uganda. From micro to macro-level, the study units include PLHIV receiving DTG-regimens and/or IPT; the pair of PLHIV and peer supporter; the peer supporter; the combination of the PLHIV with peer supporter and ART-site; peer supervisor; the pair of peer supervisor and peer supporter; and the ART-site. At the study ART-site, HCPs and health facility managers will be included. Lastly, the reporting of suspected ADRs by PLHIV, peer supporters, HCPs and ART-sites to the NPC will also be examined.

About 17% of PLHIV are ART-naive, 95% are aged 15 years and older, and 89% receive first-line ART either as treatment-naive or treatment-experienced PLHIV[36].

### Eligibility criteria:

*Inclusion criteria:* Selection of study units will occur at three levels: *First*, eligible PLHIV should i) be aged  $\geq 15$  years, ii) receive ART at the selected study sites, iii) own a mobile phone (smartphone, basic feature phone) and, iv) provide written/thumb-printed informed consent. Child consent can be given by emancipated minors aged 15 to 17 years in Uganda[39] *Second*, eligible peer supporters (expert clients, CHWs) will be those that are recognized and seconded by the study sites or collaborating patient safety groups. These peer supporters will be those that are attached to the study sites and have already received institutional training in their role as expert clients/CHWs; they should own mobile phones. A focal clinical staff assigned to the study by the health facility administration will approach and recruit the peer supporters. The recruited peer supporters will be screened by the research team to gauge their ability to be peer supporters e.g. the ability to use the Med Safety App/USSD, ability to read and write in English and good interpersonal skills. Satisfactory peer supporters will give written informed consent. Peer supporters will participate only in the intervention arm of the study. *Third*, study health facilities will be selected and enrolled as follows; in each of the four geographical regions, blocks of three health facilities each with an ART-site, including at least a RRH, HC IV and HC III will be created based on the catchment of each RRH. From the created blocks of three health facilities in each region, two blocks will be selected by simple random sampling to participate in the study as the intervention and comparison health facilities, respectively. This will give 24 ART-sites consisting of 12 intervention sites (4 RRHs, 4 HC IVs, 4 HC IIIs) matched by level of care and region with 12 comparison sites (4 RRHs, 4 HC IVs, 4 HC IIIs) selected from the four geographical regions of Uganda.

*Exclusion criteria:* Exclusion will apply only at the level of PLHIV and CHWs. We shall exclude PLHIV on ART for < 6-months and expert clients/ CHWs who will be unable to commit, from the outset, at least 5-hrs per week to the study for up to 4-months.

Many ADRs happen when starting ART although such PLHIV tend to be unstable on treatment. The priority of this pilot is to understand the dynamics (feasibility and acceptability) of the peer support intervention in a *stable group* of PLHIV on ART (for  $\geq 6$  months). If found to be feasible, the peer support intervention will be introduced, in future initiatives, to the *unstable group* of PLHIV on ART (for <6 months).

### Sample Size and Sampling Considerations



1  
2  
3 Sample size computation is based on the possible effect of the peer support intervention on  
4 the rate of ADR-reporting by PLHIV, with adjustment for clustering. We assume a conservative  
5 intra-cluster correlation coefficient of 0.045 and a priori increase of 50% in the rate of ADR-  
6 reporting to NDA, from 6 ADR-reports per 100 person-years at baseline[40] to 9 ADR-reports  
7 per 100 person-years at end-line evaluation. We assume a standard deviation of 12 ADR-  
8 reports per 100 person-years computed from the monthly ADR-reports submitted to NPC for  
9 one-year (October 2018 to September 2019). The study is designed to have at least 80%  
10 power to estimate an effect size of 1.5. Thus, 126 PLHIV will be required in the intervention  
11 arm and 126 PLHIV in the control arm.  
12  
13

14  
15 Since the caseload for each peer supporter will be 5 PLHIV in the intervention arm, 60 peer  
16 supporters (15 from each of the 4 regions) will be responsible for 300 PLHIV on DTG and/or  
17 IPT. Thus, the peer support arm will include 300 PLHIV and the control arm 300 PLHIV all of  
18 whom should own functional mobile phones (smartphone or non-smartphone or both). Thus,  
19 a total of 600 PLHIV will be enrolled; 400 from RRHs, 120 from HC IVs and 80 from HC IIIs.  
20

21  
22 The PLHIV will be enrolled consecutively until the required sample size is attained.  
23 Smartphone owners will be guided to install Med Safety for ADR-reporting. We assume that 7  
24 in 10 PLHIV at the ART-sites will have mobile phones and only one in 10 will possess  
25 smartphones[41]. Thus, only up to 10% (or 60) of PLHIV with smartphones will be helped (with  
26 maximal support from peer supporters) to download Med Safety. The rest of the 540 PLHIV  
27 without smartphones or smartphone owners who will not install Med Safety will report ADRs  
28 by USSD or the traditional methods.  
29  
30

### 31 Study variables

32 *Primary outcomes:* Feasibility of the peer support intervention - attrition rate recorded as the  
33 number of study participants who remain in the study until the end of follow-up at 4 months;  
34 Number of suspected ADR reports submitted to NPC by PLHIV as measured by questionnaire  
35 and data abstracted from the national pharmacovigilance database at baseline and 4 months  
36  
37

### 38 *Other process/output/outcome variables:*

- 39 1. Acceptability of the peer support intervention measured using a questionnaire and  
40 qualitative interviews at 4 months post-intervention
- 41 2. Barriers/facilitators of the peer support intervention measured using a questionnaire  
42 during the intervention and qualitative interviews at 4 months post-intervention
- 43 3. Fidelity to the peer support intervention measured using a questionnaire and  
44 qualitative interviews at 4 months post-intervention
- 45 4. Rate of ADR-reporting to NPC by PLHIV as measured by questionnaire and data  
46 abstraction from the national pharmacovigilance database at baseline and 4 months
- 47 5. Quality of ADR-reports by PLHIV measured by questionnaire and data abstraction  
48 from the national pharmacovigilance database at baseline and 4 months
- 49 6. Time to ADR-reporting to NPC by PLHIV since enrolment measured by questionnaire  
50 and data abstraction from the national pharmacovigilance database during 4 months
- 51 7. Time from ADR onset to registration in the national pharmacovigilance database  
52 measured by questionnaire and data abstraction from the database during 4 months
- 53 8. Health-related quality of life measured by questionnaire at baseline and 4 months
- 54 9. Management of ADRs recorded using a questionnaire during the 4 months
- 55 10. Number of PLHIV linked to health facilities by peer supporters for ADR management  
56 as measured by questionnaire during the 4-month intervention period
- 57 11. Health-seeking behaviour measured using a questionnaire at baseline and 4 months  
58  
59  
60

12. Self-efficacy to report ADRs measured by questionnaire at baseline and 4 months
13. Self-reported ART adherence measured by questionnaire at baseline and 4 months
14. Mood (positive/ negative affect) measured by questionnaire at baseline and 4 months

## Patient and Public Involvement

Direct involvement of PLHIV in the detection and reporting of suspected ADRs, and patient safety groups in recruitment of PLHIV, will have value in improving the public's awareness of ADRs and the available pharmacovigilance tools (Med Safety, USSD, toll-free voice call, etc.). Together, these will be essential for ensuring that changes to clinical practice to promote patient safety based on our work are acceptable to the public.

The study team will work with PLHIV to assess whether the available pharmacovigilance tools meet their needs, to identify potential improvements and to understand facilitators and barriers to using these pharmacovigilance tools. Wider public input into the refinement of the tools and mechanisms to encourage uptake will add value to our work. This work will also be of value to the wider public as Med Safety can be used to report ADRs to any drug, and users can receive drug safety information directly from NPC.

## Data management and statistical analysis

### Quantitative data

**Data collection and management:** Baseline and end-line semi-structured questionnaires will be administered to the PLHIV and peer supporters (expert clients) in the intervention arm and PLHIV only in the comparison arm.

The baseline questionnaire will record socio-demographics (age, sex, monthly income, education level, residence) of all study participants. Clinical details (ART adherence; ADRs; ART-regimen; ART-status i.e. first-line, second-line, third-line; duration on ART; comorbidities) and healthcare-seeking behaviour of study PLHIV will be measured. Data will be transmitted to a password-protected online database via the Open Data Kit (ODK) suite of tools. Participating PLHIV will be asked at enrolment if they experienced suspected ADRs in the 4-months preceding the study. The self-reported suspected ADRs will be corroborated with additional information on documented suspected ADRs from retrospective clinical chart review of the 4-month period prior to study enrolment. The clinical charts will be accessed by the health facility staff.

**Additional data collection for the intervention group:** On a weekly basis for up to 4-months, peer supporters will inquire from each assigned PLHIV (during a 1 hour face-to-face or phone call interaction) if he/she experienced one or more suspected ADR(s) and if the ADR had any impact on quality of life and/or ART adherence. Peer supporters will document if the ADR(s) was/were reported; and, if reported, by which means (Med Safety, USSD, voice call, other methods). Peer supporters will document all ADRs experienced by the PLHIV during the previous 1-week (using a tool designed to capture the medicines and ADRs); and will guide the PLHIV to report ADRs directly to NPC using the available pharmacovigilance methods. Active surveillance of ADRs linked to DTG and/or IPT will be prioritized but ADRs linked to other medicines will also be documented. PLHIV who experience serious ADRs will be linked directly to the health facilities where they receive ART for ADR management. Peer supporters will refer serious ADR cases to peer supervisors who will, in turn, refer these cases to focal clinical staff assigned to the study by the health facility administration; usually stationed at triage to connect the cases to clinicians. We will document the management of serious and

1  
2  
3 non-serious ADRs (number of serious and non-serious ADR cases referred for health facility  
4 management; actions taken by health facilities in the management of serious and non-serious  
5 ADRs e.g. stopping treatment, changing treatment, continuing treatment with adherence  
6 counselling, doing nothing, etc.).

7  
8 The end-line questionnaire for PLHIV will measure their healthcare-seeking behaviour, linkage  
9 to care for ADR management and adherence to ART. The PLHIV will also be asked to report  
10 their experiences while receiving peer support to assess the intervention's feasibility and  
11 acceptability (e.g. user satisfaction). The study will also assess the participants' experiences  
12 when using the various pharmacovigilance methods (Med Safety, USSD, toll-free voice call,  
13 etc.). We shall assess the ease of use, language and costs of the available pharmacovigilance  
14 methods (Med Safety, USSD, toll-free voice call, etc) alongside peer support.  
15  
16

17 **Med Safety App and USSD data collection:** PLHIV will submit ADR-reports via Med Safety  
18 and/or USSD with initial assistance from peer supporters. Each app-based ADR-report will be  
19 automatically converted into the standard E2B (R2) format prior to its receipt in the Vigilance  
20 Hub[42]. The app is hosted by Uganda's NDA which manages the reported ADR data. For  
21 USSD reporting, PLHIV will dial the USSD code and answer a set of questions. The data will  
22 be stored in real-time on a dashboard accessible to the project staff.  
23  
24

25 **Statistical analysis:** All ADR-data in both the national and project databases and received  
26 from the study sites during the study period will be exported into Stata version 15.0 MP for  
27 descriptive analysis – frequencies, proportions and their 95% confidence intervals (StataCorp  
28 LLC, College Station, Texas). Duplicate ADR-reports will be identified and analysed  
29 accordingly. Summary estimates will be reported by pharmacovigilance method (Med Safety,  
30 USSD, toll-free voice call, etc.).  
31  
32

33 To assess the feasibility to retain peer supporters and PLHIV, we shall compute the attrition  
34 rate which is the proportion of study participants who remain in the study until the end of follow-  
35 up at 4 months.  
36  
37

38 The number of suspected ADRs reported to NPC by the PLHIV overall and in each study arm  
39 will be described by subgroup: serious ADR (yes/no); peer supporter guided (yes/no); DTG-  
40 linked (yes/no); IPT-linked (yes/no); DTG/IPT-linked (yes/no); linked to other medicines  
41 (yes/no); level of reporting (PLHIV, peer supporter, HCP, health facility) etc.  
42  
43

44 The rate of ADR-reporting ( $m_a$ ) by PLHIV (per site, overall) per completed-month ( $m_1$ ) of follow-  
45 up will be computed as follows:  $m_a = [n_a \text{ reports}/(N_a \text{ completed-months of follow-up})]$ , where  
46  $n_a$  is the number of reported ADRs and  $N_a$  the number of completed-months of follow-up.  
47 Reporting rates of same-day ADR-onsets will be documented; and time from ADR-onset to  
48 registration in the national database recorded for all other events[33]. Time to ADR-reporting  
49 to NPC for a PLHIV will be the time from the day a PLHIV is enrolled into the peer support  
50 intervention to the time he/she reports the first suspected ADR to NPC. Time-to-event data  
51 will be analysed by survival analysis techniques.  
52  
53

54 We will explore the influence of level of care on the uptake of the peer support intervention in  
55 Uganda's healthcare system - such as whether rolling it out at primary care facilities or tertiary  
56 hospitals influences uptake.  
57  
58

59 The change in outcome measures (e.g.) between pre- and post-intervention in PLHIV will be  
60 assessed using a linear mixed model with random effect for peer supporter. Random effect

1  
2  
3 will be included to account for clustering of PLHIV with peer supporters. The ICC will be  
4 estimated from this model. Since supporters are a mixed population of expert clients and  
5 CHWs, a stratified analysis will be conducted. To aid the planning of future randomized  
6 controlled trials from this pilot's data, we shall report effect sizes.  
7

### 8 9 Qualitative data

10 **Data collection:** Post-intervention, a combination of focus group discussions (FDGs), in-  
11 depth interviews (IDIs) and Key Informant Interviews (KIIs) will be conducted with purposively  
12 selected study participants. A lead qualitative researcher will be assisted by two well-trained  
13 research assistants. Semi-structured interviews informed by the Consolidated Framework for  
14 Implementation Research (CFIR)[43] will be used to elicit participants' perspectives on the  
15 facilitators and barriers to implementing the peer support intervention at four purposively  
16 selected health facilities.  
17

18  
19 We will conduct six FGDs with three categories of PLHIV in the intervention arm; two with  
20 those enrolled in Community Drug Distribution Points (CDDPs), two in Community Client-Led  
21 ART Delivery (CCLAD) and two in facility-based ART delivery models.  
22

23  
24 A total of 12 IDIs will be conducted with peer supporters (expert clients, CHWs) attached to  
25 each of the three ART delivery models; a) CDDP, b) CCLAD, c) Facility-Based, see **Figure 5**.  
26

27  
28 Four KIIs will be conducted with HCPs/facility managers with insights in the implementation  
29 experience of the peer support intervention at their respective host facilities from an  
30 organizational-context.  
31

32  
33 As a first step, participants will complete a written informed consent form. We will then capture  
34 baseline characteristics: age, gender and educational level. A CFIR-informed semi-structured  
35 guide will be used for the interviews. The semi-structured guide will explore participants'  
36 experiences with the peer support intervention, their preferences and suggestions for  
37 improvement of the intervention and the challenges encountered in using USSD and/or Med  
38 Safety. On average, the duration of the FGDs and IDIs will be approximately 45-60 min. The  
39 FGDs, IDIs and KIIs will be conducted until theoretical saturation is reached. Theoretical  
40 saturation means that no new knowledge is generated and all aspects of a theory are covered.  
41 All the data generated from the focus groups and interviews will be explored for themes and  
42 sub-themes.  
43

44  
45 **Guiding qualitative analytical framework:** The CFIR will be adopted as the overall guiding  
46 analytical framework for this study. The CFIR is a comprehensive 'meta-theoretical'  
47 implementation research framework compiled from more than 20 sources and is cross-cutting  
48 in more than 13 scientific disciplines; it guides systematic assessment of multi-level  
49 implementation settings to identify factors that influence intervention implementation and  
50 effectiveness [44]. The CFIR informs the conceptualization of this study, will guide the  
51 development of data collection tools and will serve as an overarching deductive thematic  
52 framework in analysis of study findings and the overall synthesis and interpretation of results  
53 for this study. The CFIR is widely-applied because of its multi-level, 'ecological' dimensions  
54 on multi-faceted influences on healthcare intervention implementation outcomes[45]. The  
55 CFIR has been applied across diverse interventions and varied content fields[44].  
56  
57

58  
59 More specifically, the CFIR-derived domains that will guide the study are the following:  
60

1  
2  
3 *Intervention characteristics:* Implementation of the peer support intervention could potentially  
4 be impacted by factors including its perceived effectiveness in ADR-reporting, relative  
5 advantages over alternative reporting approaches, adaptability in varied resource-constrained  
6 settings, trialability, complexity, design quality and presentation, and cost-effectiveness.  
7

8  
9 *Outer setting:* external influences on implementation of peer support may include external  
10 policies and incentives, socio-cultural belief systems, peer pressure dynamics and socio-  
11 economic context.  
12

13 *Inner setting:* characteristics of the implementing organization (or host health facility) such as  
14 organizational culture, the relative priority assigned to the peer support intervention (including  
15 funding support), presence of intervention 'champions', availability of supportive administrative  
16 or physical infrastructure, congruence with host organization's mission and vision, quality of  
17 leadership support and implementation climate(s).  
18

19  
20 *Characteristics of individuals:* Patients' beliefs, knowledge, level of income, self-efficacy, and  
21 personal attributes that may affect the implementation and uptake of the peer support  
22 intervention.  
23

24  
25 *Process of implementation:* Influences on implementation outcomes may derive from different  
26 implementation phases involved in roll-out of the peer support strategy such as degree and  
27 quality of involvement of primary beneficiaries in designing the intervention, planning,  
28 execution, degree of effectiveness of monitoring and evaluation strategies and presence of  
29 key intervention stakeholders and influencers including opinion leaders, stakeholder  
30 engagement, and intervention champions.  
31

32  
33 The CFIR will be used to identify barriers and facilitators of the peer support intervention for  
34 promoting ADR-reporting by PLHIV.  
35

36 **Data analysis:** Our qualitative data analysis will follow the procedures recommended by Miles  
37 & Huberman (1994)[46]. Interviews and FGDs will be audio-recorded and transcribed verbatim  
38 into text transcripts by three research assistants (and translated into English where  
39 necessary). Data will be analysed, in an iterative process, involving four major steps:  
40

41 a) *Data familiarization:* An experienced qualitative researcher and one other investigator will  
42 read the interview transcripts multiple times for data familiarization.  
43

44  
45 b) *Developing a coding framework:* We shall adopt the five CFIR-derived domains  
46 (*Intervention characteristics, outer setting, inner setting, characteristics of individuals, and*  
47 *process of implementation*) as an overarching deductive thematic framework, combined with  
48 an inductive approach based on the data[47].  
49

50 c) *Data abstraction:* The coded data will be categorized into thematic categories.  
51

52  
53 d) *Overall interpretation and synthesis:* Our overall synthesis of study findings will adopt a  
54 team-based process of peer-debriefing involving all investigators to resolve disagreements in  
55 interpretation of study findings.  
56

### 57 **Quality assurance**

58 To ensure uniform study procedures and high-quality data, all research assistants recruited  
59 for the study will receive face-to-face training on the following: the informed consent process,  
60

1  
2  
3 participant interviewing techniques, confidentiality issues, pharmacovigilance, use of the Med  
4 Safety App, use of the USSD, ADRs, use of the Open Data Kit (ODK) software for data entry  
5 into an online password-protected database; and qualitative and quantitative study designs,  
6 among others.  
7

8 The FGDs and KIs will be led by an expert in qualitative research. Research assistants with  
9 prior training in qualitative research methods will also be hired for the qualitative study  
10 component. All research assistants will receive face-to-face training in both qualitative and  
11 quantitative research methods.  
12

13  
14 Questionnaire data will be transmitted through ODK to an online database by the research  
15 assistants while still in the field. The study statistician will check the online data for integrity  
16 and contact field staff as soon as possible while still in the field to correct any data entry errors.  
17 Prior to entry into ODK, all research assistants shall be required to cross-check the data on  
18 study questionnaires to eliminate errors and ensure data completeness.  
19

### 20 21 **Results uptake and use**

22 *Outcomes/Impact/Outreach:* The peer support intervention is expected to increase patient-  
23 reporting of ADRs to NPC. It is anticipated that the patients will subsequently; i) find it easier  
24 and faster to report ADRs (including DTG- and IPT-related reactions) anywhere and at any  
25 time using their mobile phones and, ii) receive medication-safety alerts directly from NPC to  
26 their phones. We expect this project to promote pharmacovigilance in Uganda by improving;  
27 i) the exchange of medication-safety information between patients, peer supporters, HCPs  
28 and NPC, ii) the awareness of pharmacovigilance by patients and the public through the  
29 mobile phone and other awareness campaigns and, iii) the rate of ADR-reporting by patients.  
30  
31

32 *Potential impact on policy or programs:* This project could foster the increased involvement of  
33 patients in pharmacovigilance activities and improve the efficiency of pharmacovigilance  
34 systems in Uganda with real-time monitoring of DTG and INH safety in PLHIV in the first  
35 instance, thus, increasing the volume of analysable data for quick decision-making by both  
36 clinicians and policy makers.  
37  
38

39 We expect to promote collaboration between consumers/public and the NPC, national AIDS  
40 Control Program - Ministry of Health and the National TB and Leprosy Control Programme  
41 (NTLP). The accumulation of relevant medication-safety data from spontaneous and active  
42 ADR-reports permits robust detection of safety signals at the national and international levels.  
43  
44

45 *Scalability:* After this pilot project, we expect the peer support intervention to be tested in a  
46 nationwide randomized controlled trial; and the USSD and Med Safety App to be modified  
47 accordingly and implemented at all 1,832 ART-sites in Uganda to complement the existing  
48 active and passive pharmacovigilance methods for ART and TB treatment. We hope to embed  
49 peer support in routine pharmacovigilance practice to promote the detection and reporting of  
50 ADRs by PLHIV in Uganda. The Med Safety App is available in English and will be  
51 subsequently translated into other local languages according to need.  
52  
53

54 The USSD and Med Safety are potentially invaluable tools for the pharmacovigilance of drugs  
55 used for other diseases e.g. non-communicable diseases like cancers, diabetes mellitus,  
56 hypertension etc.  
57  
58  
59  
60

Peer support, USSD and Med Safety will be scaled-up to support spontaneous ADR-reporting in both public and private health facilities at all levels of healthcare ranging from hospitals, medical centres and clinics to pharmacies and drug shops, not least, the general public.

The pharmacovigilance data at NPC could be linked with the patients' clinical data at ART-sites, stock consumption data from the Supply Management Chain system; and the electronic Health Management Information System. Machine learning/artificial intelligence analytical techniques could then be used on big data in the near future to foster improved systems.

*Sustainability:* Peer support to promote the detection and reporting of ADRs by PLHIV can be embedded in the HIV/AIDS program of Uganda just as community engagement programmes have been successful in Maternal and Child Health programmes; and are being rolled out in the COVID-19 Community Engagement Strategy and the Young people and Adolescent Peer Support Model for improving HIV care and treatment outcomes for Adolescents and young PLHIV of 2019 in Uganda[48, 49]. The USSD and Med Safety will be integrated into NPC's routine pharmacovigilance functions to complement existing pharmacovigilance methods. Regional pharmacovigilance centres have pharmacovigilance focal persons who will continue to support the NPC. All ADR-reports received by NPC are reviewed and submitted into an existing national medication-safety database. The equipped peer supporters are a valuable resource for scaling up peer support in the ART-sites after the study is concluded.

The USSD interface and Med Safety will be freely available. Med Safety can be downloaded and installed from both Google Play and Apple iOS stores. NPC pays the salaries of its full-time pharmacovigilance staff who receive and process the reported medication-safety data.

The research collaboration between Makerere University's Department of Pharmacology, Department of Pharmacy, NPC, ACP, MHRA and other stakeholders will continue to source for additional research grants to support the future scale-up of evidence-based digital pharmacovigilance in Uganda. The findings could be helpful to other countries to inform their own pharmacovigilance activities.

### **Dissemination**

Med Safety users will immediately benefit from the app's two-way communication functionality as they will receive medication-safety alerts from NPC in addition to their submission to NPC of ADR-reports.

We plan to present the project's research findings at local stakeholders' workshops organized to ensure the balanced representation of HCPs, administrators, policy makers, patient safety groups, the public and other local and international partners. At least one policy brief will be prepared from this work. We shall also disseminate the results at three or more local and international conferences, engage the public through local and international television channels, and through social media (Facebook, Twitter, WhatsApp, blogging etc.). We shall publish at least two manuscripts in internationally-recognized peer-reviewed journals.

### **Ethical and environmental considerations**

The study received ethical approval from the School of Health Sciences Research and Ethics Committee at Makerere University College of Health Sciences (MAKSHSREC-2020-64); and was registered with the Uganda National Council for Science and Technology (HS1206ES). Administrative clearance will be obtained from participating ART-sites and written/thumb-printed informed consent from participating PLHIV and expert clients/CHWs. We consider the

1  
2  
3 introduction of USSD and Med Safety for ADR-reporting to be a minimal risk intervention.  
4 However, we shall remind participants to mind their own confidentiality which could be lost  
5 due to phone sharing. On the contrary, participants in the intervention group could potentially  
6 benefit from peer-support. We received a waiver of consent from the ethics committee to  
7 access anonymized clinical and medication data of PLHIV at the health facilities. The data will  
8 be extracted by staff of the respective health facilities. Applicable international laws on data  
9 protection will be observed as well as the Data Protection and Privacy Act, 2019 of the  
10 Republic of Uganda[50].  
11  
12

### 13 **Risk management**

14 *Small number of patients ( $\leq 10\%$ ) expected to own functional smartphones:* Our main goal is  
15 to demonstrate that Med Safety can be downloaded and used by PLHIV, which we can  
16 achieve without the requirement for strict sample size and power calculations. Also, we shall  
17 use the USSD which can work on both basic low-tech mobile phones and high-tech  
18 smartphones.  
19

20 *Duplicate ADR-reports:* Duplicates will be identified by the NPC staff and study statistician.  
21

22 *Loss to follow-up of peer supporters and PLHIV:* A major goal is to demonstrate the feasibility  
23 of peer support for PLHIV to get involved in ADR-reporting. The study will provide preliminary  
24 data on the magnitude of loss to follow-up to be expected in future studies.  
25

26 *Compromise in data quality by the research assistants:* The research assistants will be trained  
27 by the study team. Questionnaire data will be transmitted online immediately using ODK –  
28 thus giving a chance to the centrally located statistician to verify data integrity.  
29

30 *COVID-19:* We shall observe the SOPs of social distancing, washing hands and wearing  
31 masks by study participants and investigators to minimise the risk of spreading COVID-19.  
32 The pandemic could limit face-to-face contact but is also an opportunity to show how more  
33 remote engagement can support pharmacovigilance in a developing country setting. Remote  
34 engagement could be more cost-effective to support participants through phone calls and  
35 other forms of online interaction.  
36  
37  
38  
39

### 40 **Collaboration**

41 MHRA adapted Med Safety for Uganda with NDA's approval. The NPC staff at NDA, where  
42 NPC is located, will participate in this project. Involvement of the ACP in this  
43 pharmacovigilance project will promote the integration of peer support-driven  
44 pharmacovigilance in the HIV care and treatment programme of Uganda. The Department of  
45 Pharmacology & Therapeutics and Department of Pharmacy, Makerere University conceived  
46 this project and will coordinate the study. The WHO contracted MHRA to adapt the app for  
47 Uganda and will, together with UMC, provide technical support.  
48  
49

50 **Acknowledgements:** Uganda's National Drug Authority provided technical and logistical  
51 support during the planning phase of this project.  
52

53 **Contributors:** RK, HZ, FK, SMN, JNS designed the study. RK drafted the manuscript. RK,  
54 HBN, VN, CK, HZ, SMN, JNS, PT, KH, CSM, MR, FK critically reviewed and revised the final  
55 version of the manuscript. All authors read and approved the final manuscript.  
56

57 **Funding:** This project was supported by the Special Program for Research and Training in  
58 Tropical Diseases (TDR), a co-sponsored program of the United Nations Children's Fund, the  
59 United Nations Development program, the World Bank, and the World Health Organization  
60



1  
2  
3 (No grant number). TDR funding was provided by governmental and co-sponsor core  
4 contributions to TDR.  
5

6 **Disclaimer:** CS Merle and ME Raguenaud are staff members of the WHO; the authors alone  
7 are responsible for the views expressed in this publication and they do not necessarily  
8 represent the decisions, policies or views of WHO.  
9

10 **Competing interests:** None declared.  
11

12 **Patient consent for publication:** Not required.  
13

14 **Provenance and peer review:** Not commissioned; externally peer reviewed.  
15

16 **Open access:** This is an open access article distributed in accordance with the Creative  
17 Commons Attribution Non-Commercial (CC BY-NC 4.0) license, which permits others to  
18 distribute, remix, adapt, build upon this work non-commercially,  
19 and license their derivative works on different terms, provided the original work is properly  
20 cited, appropriate credit is given, any changes made indicated, and the use is non-commercial.  
21 See: <http://creativecommons.org/licenses/by-nc/4.0/>.  
22  
23  
24  
25  
26  
27  
28  
29  
30  
31  
32  
33  
34  
35  
36  
37  
38  
39  
40  
41  
42  
43  
44  
45  
46  
47  
48  
49  
50  
51  
52  
53  
54  
55  
56  
57  
58  
59  
60

## References

1. Johnson, J.A. and J.L. Bootman, *Drug-related morbidity and mortality and the economic impact of pharmaceutical care*. Am J Health Syst Pharm, 1997. **54**(5): p. 554-8.
2. Kiguba, R., C. Karamagi, and S.M. Bird, *Incidence, risk factors and risk prediction of hospital-acquired suspected adverse drug reactions: a prospective cohort of Ugandan inpatients*. BMJ Open, 2017. **7**(1): p. e010568.
3. Tumwikirize, W.A., et al., *Adverse drug reactions in patients admitted on internal medicine wards in a district and regional hospital in Uganda*. Afr Health Sci, 2011. **11**(1): p. 72-8.
4. Coleman, J.J. and S.K. Pontefract, *Adverse drug reactions*. Clin Med (Lond), 2016. **16**(5): p. 481-485.
5. Onakpoya, I.J., C.J. Heneghan, and J.K. Aronson, *Post-marketing withdrawal of 462 medicinal products because of adverse drug reactions: a systematic review of the world literature*. BMC Med, 2016. **14**: p. 10.
6. Bates, D.W., et al., *Incidence of adverse drug events and potential adverse drug events. Implications for prevention. ADE Prevention Study Group*. JAMA, 1995. **274**(1): p. 29-34.
7. Hazell, L. and S.A. Shakir, *Under-reporting of adverse drug reactions : a systematic review*. Drug Saf, 2006. **29**(5): p. 385-96.
8. Kiguba, R., et al., *Recognition and reporting of suspected adverse drug reactions by surveyed healthcare professionals in Uganda: key determinants*. BMJ Open, 2014. **4**(11): p. e005869.
9. Lopez-Gonzalez, E., M.T. Herdeiro, and A. Figueiras, *Determinants of under-reporting of adverse drug reactions: a systematic review*. Drug Saf, 2009. **32**(1): p. 19-31.
10. Defer, G., et al., *Adverse Drug Reaction Reporting Using a Mobile Device Application by Persons with Multiple Sclerosis: A Cluster Randomized Controlled Trial*. Drug Saf, 2021. **44**(2): p. 223-233.
11. Margraff, F. and D. Bertram, *Adverse drug reaction reporting by patients: an overview of fifty countries*. Drug Saf, 2014. **37**(6): p. 409-19.
12. Inácio, P., A. Cavaco, and M. Airaksinen, *The value of patient reporting to the pharmacovigilance system: a systematic review*. 2017. **83**(2): p. 227-246.
13. Avery, A.J., et al., *Evaluation of patient reporting of adverse drug reactions to the UK 'Yellow Card Scheme': literature review, descriptive and qualitative analyses, and questionnaire surveys*. Health Technol Assess, 2011. **15**(20): p. 1-234, iii-iv.
14. Ramlakhan, J.U., et al., *What constitutes patient-centred care for women: a theoretical rapid review*. Int J Equity Health, 2019. **18**(1): p. 182.
15. Ministry of Health Uganda. *Consolidated Guidelines for Prevention and Treatment of HIV in Uganda*. 2018 [cited 2019 19 September]; Available from: <http://library.health.go.ug/publications/hivaids/consolidated-guidelines-prevention-and-treatment-hiv-uganda>.
16. Ministry of Health Uganda, *Consolidated guidelines for the prevention and treatment of HIV and AIDS in Uganda Kampala, Uganda*. 2020, Ministry of Health Uganda.
17. Johnson, S., et al., *Peer-supported self-management for people discharged from a mental health crisis team: a randomised controlled trial*. Lancet, 2018. **392**(10145): p. 409-418.
18. Kong, L.N., et al., *The effectiveness of peer support on self-efficacy and quality of life in adults with type 2 diabetes: A systematic review and meta-analysis*. J Adv Nurs, 2019. **75**(4): p. 711-722.
19. Ammon, N., S. Mason, and J.M. Corkery, *Factors impacting antiretroviral therapy adherence among human immunodeficiency virus-positive adolescents in Sub-Saharan Africa: a systematic review*. Public Health, 2018. **157**: p. 20-31.
20. Snyder, K., et al., *Preliminary results from Hlanganani (Coming Together): A structured support group for HIV-infected adolescents piloted in Cape Town, South Africa*. Children and Youth Services Review, 2014. **45**: p. 114-121.
21. Genberg, B.L., et al., *Improving Engagement in the HIV Care Cascade: A Systematic Review of Interventions Involving People Living with HIV/AIDS as Peers*. AIDS Behav, 2016. **20**(10): p. 2452-2463.

- 1  
2  
3  
4  
5  
6  
7  
8  
9  
10  
11  
12  
13  
14  
15  
16  
17  
18  
19  
20  
21  
22  
23  
24  
25  
26  
27  
28  
29  
30  
31  
32  
33  
34  
35  
36  
37  
38  
39  
40  
41  
42  
43  
44  
45  
46  
47  
48  
49  
50  
51  
52  
53  
54  
55  
56  
57  
58  
59  
60
22. Davidson, L., et al., *Peer support among adults with serious mental illness: a report from the field*. Schizophr Bull, 2006. **32**(3): p. 443-50.
  23. Lawn, S., A. Smith, and K. Hunter, *Mental health peer support for hospital avoidance and early discharge: An Australian example of consumer driven and operated service*. Journal of Mental Health, 2008. **17**(5): p. 498-508.
  24. Ratzlaff, S., et al., *The Kansas Consumer as Provider program: measuring the effects of a supported education initiative*. Psychiatr Rehabil J, 2006. **29**(3): p. 174-82.
  25. Repper J, et al. *Peer support workers: theory and practice*. 2013 [cited 2021 28 May]; Available from: <https://www.centreformentalhealth.org.uk/publications/peer-support-workers-theory-and-practice>.
  26. GSMA. *Low Tech, High Impact: USSD in the time of COVID-19*. 2020; Available from: <https://www.gsma.com/mobilefordevelopment/uncategorized/low-tech-high-impact-ussd-in-the-time-of-covid-19/>.
  27. WEB-RADR. *Med Safety App*. Available from: <https://web-radr.eu/mobile-apps/med-safety/>.
  28. smsone. [cited 2021 26 July]; Available from: <https://smsone.co.ug/>.
  29. Ayo C. K., et al., *A prototype mobile money implementation in Nigeria*. African Journal of Business Management, 2012. **6**(6): p. 2195-2201.
  30. kolastudios. [cited 2021 26 July]; Available from: <https://kolastudios.com/#contact>.
  31. Ghosh, R. and D. Lewis, *Aims and approaches of Web-RADR: a consortium ensuring reliable ADR reporting via mobile devices and new insights from social media*. Expert Opin Drug Saf, 2015. **14**(12): p. 1845-53.
  32. Proctor, E., et al., *Outcomes for implementation research: conceptual distinctions, measurement challenges, and research agenda*. Adm Policy Ment Health, 2011. **38**(2): p. 65-76.
  33. Kiguba, R., et al., *Adverse Drug Reaction Onsets in Uganda's VigiBase((R)): Delayed International Visibility, Data Quality and Illustrative Signal Detection Analyses*. Pharmaceut Med, 2018. **32**(6): p. 413-427.
  34. CQUIN. *Differentiated Service Delivery in Uganda*. 2020; Available from: <https://cquin.icap.columbia.edu/the-work/uganda/>.
  35. Ministry of Health Uganda. *The 2019 HIV Epidemiological Surveillance Report for Uganda*. 2020; Available from: <https://www.health.go.ug/cause/the-2019-hiv-epidemiological-surveillance-report-for-uganda/>.
  36. PEPFAR. *PEPFAR Uganda Country Operational Plan (COP) 2019 Strategic Direction Summary April 12, 2019*. Available from: [https://www.state.gov/wp-content/uploads/2019/09/Uganda\\_COP19-Strategic-Directional-Summary\\_public.pdf](https://www.state.gov/wp-content/uploads/2019/09/Uganda_COP19-Strategic-Directional-Summary_public.pdf).
  37. Levesque, J.-F., M.F. Harris, and G. Russell, *Patient-centred access to health care: conceptualising access at the interface of health systems and populations*. International Journal for Equity in Health, 2013. **12**(1): p. 18.
  38. Peers for Progress and National Council of La Raza. *Global Evidence for Peer Support; Humanizing healthcare*. Report from an International Conference [cited 2021 28 May]; Available from: <http://peersforprogress.org/>.
  39. Uganda National Council for Science and Technology. *National Guidelines for Research involving Humans as Research Participants*. 2014 [cited 2021 27 July]; Available from: [https://engage.avac.org/wp-content/uploads/grassblade/12230-testing-tincan/story\\_content/external\\_files/Uganda%202014%20National%20guidelines%20for%20research%20involving%20humans%20as%20research%20participants.pdf](https://engage.avac.org/wp-content/uploads/grassblade/12230-testing-tincan/story_content/external_files/Uganda%202014%20National%20guidelines%20for%20research%20involving%20humans%20as%20research%20participants.pdf).
  40. Batista, C.J.B., et al., *The Brazilian experience of implementing the active pharmacovigilance of dolutegravir*. Medicine (Baltimore), 2019. **98**(10): p. e14828.
  41. The Collaboration on International ICT Policy for East and Southern Africa. *National Information Technology Survey*. 2017 [cited 2021 28 May]; Available from: <https://www.nita.go.ug/sites/default/files/publications/National%20IT%20Survey%20April%2010th.pdf>.

- 1
- 2
- 3
- 4 42. Pierce, C.E., et al., *Recommendations on the Use of Mobile Applications for the Collection and*
- 5 *Communication of Pharmaceutical Product Safety Information: Lessons from IMI WEB-*
- 6 *RADR*. Drug Saf, 2019. **42**(4): p. 477-489.
- 7 43. Damschroder, L.J., et al., *Fostering implementation of health services research findings into*
- 8 *practice: a consolidated framework for advancing implementation science*. Implementation
- 9 Science, 2009. **4**(1): p. 50.
- 10 44. Safaeinili, N., et al., *CFIR simplified: Pragmatic application of and adaptations to the*
- 11 *Consolidated Framework for Implementation Research (CFIR) for evaluation of a patient-*
- 12 *centered care transformation within a learning health system*. Learning Health Systems,
- 13 2020. **4**(1): p. e10201.
- 14 45. Means, A.R., et al., *Evaluating and optimizing the consolidated framework for*
- 15 *implementation research (CFIR) for use in low- and middle-income countries: a systematic*
- 16 *review*. Implementation Science, 2020. **15**(1): p. 17.
- 17 46. Miles, M.B. and A.M. Huberman, *Qualitative data analysis: An expanded sourcebook, 2nd ed.*
- 18 *Qualitative data analysis: An expanded sourcebook, 2nd ed.* 1994, Thousand Oaks, CA, US:
- 19 Sage Publications, Inc. xiv, 338-xiv, 338.
- 20 47. Fereday, J. and E. Muir-Cochrane, *Demonstrating Rigor Using Thematic Analysis: A Hybrid*
- 21 *Approach of Inductive and Deductive Coding and Theme Development*. International
- 22 Journal of Qualitative Methods, 2006. **5**(1): p. 80-92.
- 23 48. Ministry of Health Uganda, *Young people and Adolescent Peer Support Model for improving*
- 24 *HIV care and treatment outcomes for Adolescents and young PLHIV of 2019 in Uganda*.
- 25 2019.
- 26 49. Ministry of Health Uganda. *Technical Inter-sectoral Committee on COVID-19; National*
- 27 *Community Engagement Strategy for COVID-19 Response for Uganda*. 2020 [cited 2021 28
- 28 May]; Available from: [https://www.redcrossug.org/about/more-info/covid-19-](https://www.redcrossug.org/about/more-info/covid-19-community-engagement-strategy)
- 29 [community-engagement-strategy](https://www.redcrossug.org/about/more-info/covid-19-community-engagement-strategy).
- 30 50. Government of Uganda. *Data Protection and Privacy Act, 2019 of the Republic of Uganda*.
- 31 2019 [cited 2021 28 May]; Available from: <https://ict.go.ug> › wp-content › uploads ›
- 32 2019/03.
- 33
- 34
- 35
- 36
- 37
- 38
- 39
- 40
- 41
- 42
- 43
- 44
- 45
- 46
- 47
- 48
- 49
- 50
- 51
- 52
- 53
- 54
- 55
- 56
- 57
- 58
- 59
- 60

## Figures

**Figure 1.** Before-after and there-there quasi-experimental study design for a peer support intervention to improve adverse drug reaction reporting by people living with HIV in Uganda

**Figure 2:** Layers of supervision in the peer support mechanism

**Figure 3.** Four key functions of the humanizing healthcare model for peer support as adapted from the framework by Peers for Progress

**Figure 4.** Intervention and comparison groups with two-way comparisons (before-after for each group (A&C, B&D), and between groups after intervention (C&D).

**Figure 5.** The five Differentiated Service Delivery models of HIV and TB care in Uganda, 2017.

For peer review only

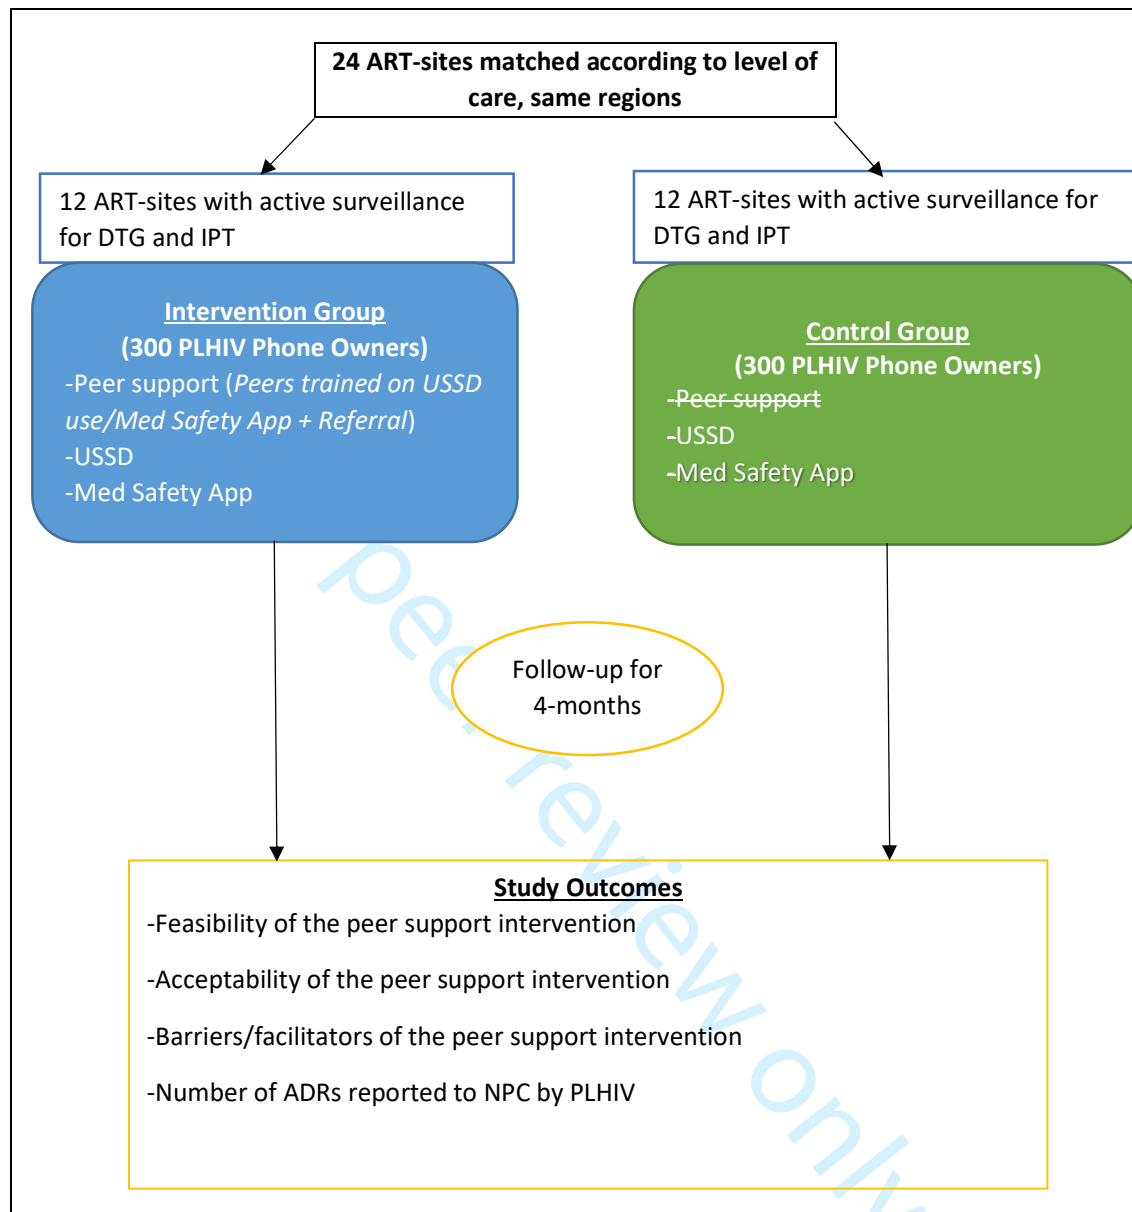

43  
44  
45  
46  
47  
48  
49  
50  
51  
52  
53  
54  
55  
56  
57  
58  
59  
60

**Figure 1.** Before-after and there-there quasi-experimental study design for a peer support intervention to improve adverse drug reaction reporting by people living with HIV in Uganda



**Figure 2.** Layers of supervision in the peer support mechanism

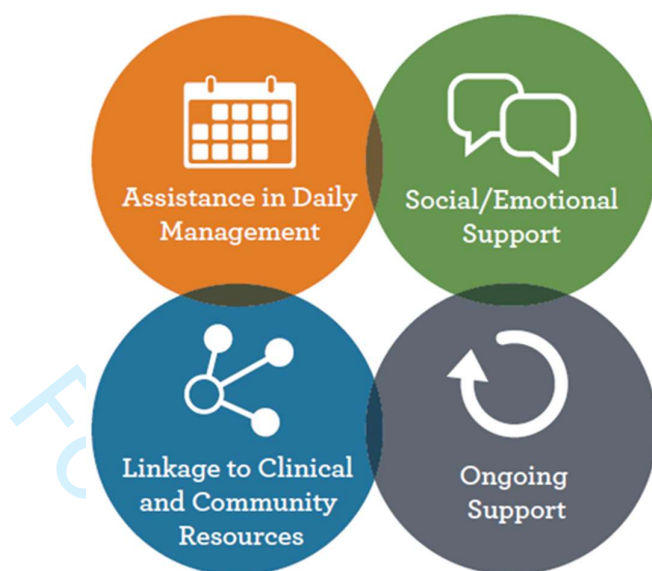

23 *Source: Peers for Progress, Global Evidence for Peer Support; Humanizing Healthcare (September 2014)*

24 **Figure 3.** Four key functions of the humanizing healthcare model for peer support as adapted from  
25 the framework by Peers for Progress  
26  
27  
28  
29  
30  
31  
32  
33  
34  
35  
36  
37  
38  
39  
40  
41  
42  
43  
44  
45  
46  
47  
48  
49  
50  
51  
52  
53  
54  
55  
56  
57  
58  
59  
60





**Figure 4.** Intervention and comparison groups with two-way comparisons (before-after for each group (A&C, B&D), and between groups after intervention (C&D)).

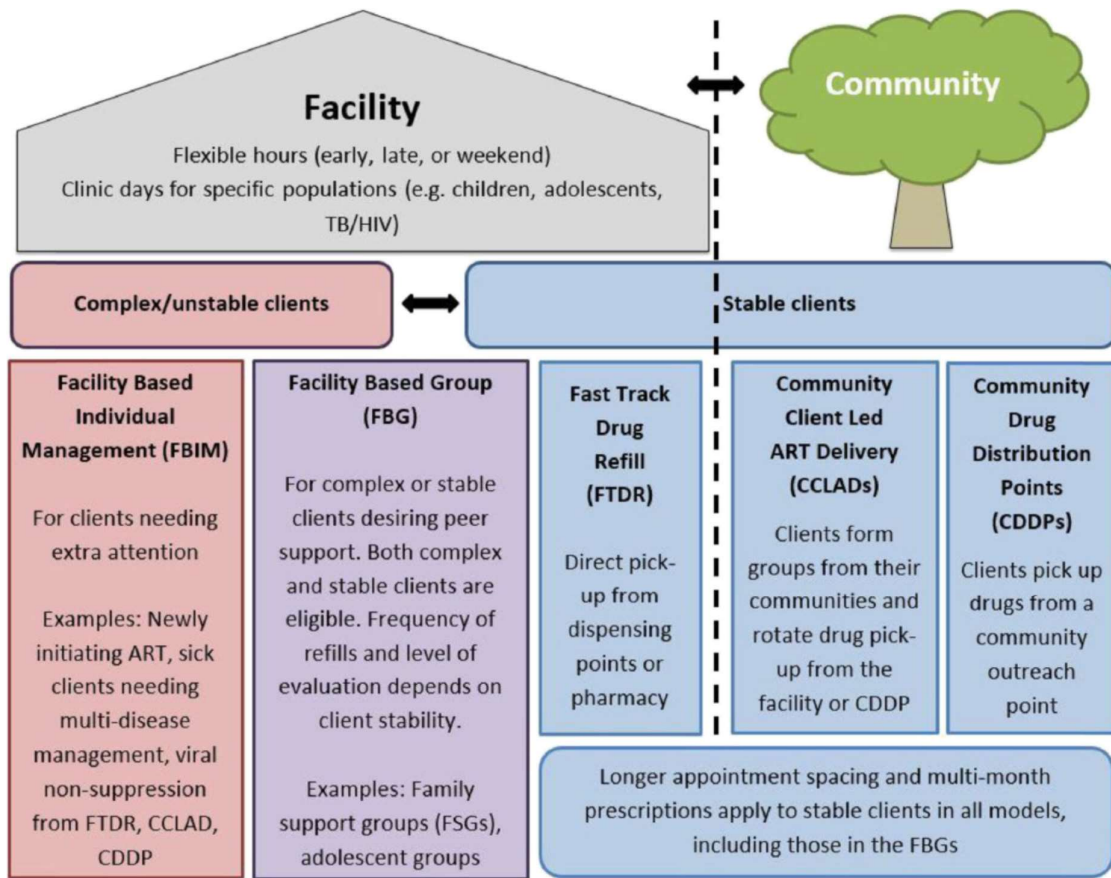

Source: Ministry of Health, *Implementation Guide for Differentiated TB Services in Uganda* (June 2017).

**Figure 5.** The five Differentiated Service Delivery models of HIV and TB care in Uganda, 2017.

# BMJ Open

## Implementation of a peer support intervention to promote the detection, reporting and management of adverse drug reactions in people living with HIV in Uganda: a protocol for a quasi-experimental study

|                                 |                                                                                                                                                                                                                                                                                                                                                                                                                                                                                                                                                                                                                                                                                                                                                                                                                                                                                                                                                                                                                                       |
|---------------------------------|---------------------------------------------------------------------------------------------------------------------------------------------------------------------------------------------------------------------------------------------------------------------------------------------------------------------------------------------------------------------------------------------------------------------------------------------------------------------------------------------------------------------------------------------------------------------------------------------------------------------------------------------------------------------------------------------------------------------------------------------------------------------------------------------------------------------------------------------------------------------------------------------------------------------------------------------------------------------------------------------------------------------------------------|
| Journal:                        | <i>BMJ Open</i>                                                                                                                                                                                                                                                                                                                                                                                                                                                                                                                                                                                                                                                                                                                                                                                                                                                                                                                                                                                                                       |
| Manuscript ID                   | bmjopen-2021-056039.R2                                                                                                                                                                                                                                                                                                                                                                                                                                                                                                                                                                                                                                                                                                                                                                                                                                                                                                                                                                                                                |
| Article Type:                   | Protocol                                                                                                                                                                                                                                                                                                                                                                                                                                                                                                                                                                                                                                                                                                                                                                                                                                                                                                                                                                                                                              |
| Date Submitted by the Author:   | 07-Mar-2022                                                                                                                                                                                                                                                                                                                                                                                                                                                                                                                                                                                                                                                                                                                                                                                                                                                                                                                                                                                                                           |
| Complete List of Authors:       | Kiguba, Ronald; Makerere University College of Health Sciences, Pharmacology and Therapeutics<br>Ndagije, Helen ; National Drug Authority, Directorate of Product Safety<br>Nambasa, Victoria; National Drug Authority, Directorate of Product Safety<br>Katureebe, Cordelia; Ministry of Health, AIDS Control Programme<br>Zakumumpa, Henry; Makerere University College of Health Sciences<br>Nanyonga, Stella; Makerere University College of Health Sciences<br>Ssanyu, Jacquelyn ; Makerere University College of Health Sciences, Department of Pharmacy<br>Tregunno, Phil; Medicines and Healthcare Products Regulatory Agency<br>Harrison, Kendal; Medicines and Healthcare Products Regulatory Agency<br>Merle, Corinne; World Health Organization, Special Programme for Research & Training In Tropical Diseases (TDR)<br>Raguenaud, Marie-eve; World Health Organization, Special Programme for Research & Training In Tropical Diseases (TDR)<br>Kitutu, Freddy; Makerere University School of Health Sciences, Pharmacy |
| <b>Primary Subject Heading</b>: | Pharmacology and therapeutics                                                                                                                                                                                                                                                                                                                                                                                                                                                                                                                                                                                                                                                                                                                                                                                                                                                                                                                                                                                                         |
| Secondary Subject Heading:      | Epidemiology, HIV/AIDS, Patient-centred medicine, Qualitative research                                                                                                                                                                                                                                                                                                                                                                                                                                                                                                                                                                                                                                                                                                                                                                                                                                                                                                                                                                |
| Keywords:                       | Adverse events < THERAPEUTICS, SOCIAL MEDICINE, Epidemiology < INFECTIOUS DISEASES, Pharmacology < TROPICAL MEDICINE                                                                                                                                                                                                                                                                                                                                                                                                                                                                                                                                                                                                                                                                                                                                                                                                                                                                                                                  |
|                                 |                                                                                                                                                                                                                                                                                                                                                                                                                                                                                                                                                                                                                                                                                                                                                                                                                                                                                                                                                                                                                                       |

SCHOLARONE™  
Manuscripts

1  
2  
3 **Implementation of a peer support intervention to promote the detection,**  
4 **reporting and management of adverse drug reactions in people living with HIV**  
5 **in Uganda: a protocol for a quasi-experimental study**  
6  
7  
8

9 **Authors:**

10 *Ronald Kiguba<sup>1\*</sup>, Helen B. Ndagije<sup>2</sup>, Victoria Nambasa<sup>2</sup>, Cordelia Katureebe<sup>3</sup>, Henry*  
11 *Zakumumpa<sup>4</sup>, Stella Nanyonga<sup>5</sup>, Jacquellyn Nambi Ssanyu<sup>6</sup>, Phil Tregunno<sup>7</sup>, Kendal*  
12 *Harrison<sup>7</sup>, Corinne S Merle<sup>8</sup>, Marie-eve Raguenaud<sup>8</sup>, Freddy Eric Kitutu<sup>6</sup>*  
13  
14

15 \*Correspondence to: Ronald Kiguba (Tel: +256 701 840683; Email: [kiguba@gmail.com](mailto:kiguba@gmail.com))  
16

17 **Affiliations:**

18  
19 <sup>1</sup>Department of Pharmacology and Therapeutics, Makerere University College of Health  
20 Sciences, Kampala, Uganda  
21

22 <sup>2</sup>National Pharmacovigilance Centre, National Drug Authority, Kampala, Uganda  
23

24 <sup>3</sup>AIDS Control Programme, Ministry of Health, Kampala, Uganda  
25

26 <sup>4</sup>School of Public Health, Makerere University College of Health Sciences, Kampala, Uganda  
27

28 <sup>5</sup>Clinical Epidemiology Unit, Makerere University College of Health Sciences, Kampala,  
29 Uganda  
30

31 <sup>6</sup>Sustainable Pharmaceutical Systems (SPS) unit, Department of Pharmacy, School of  
32 Health Sciences, Makerere University College of Health Sciences, Kampala, Uganda  
33

34 <sup>7</sup>Medicines and Healthcare products Regulatory Agency, London, United Kingdom  
35

36 <sup>8</sup>The Special Programme for Research & Training in Tropical Diseases (TDR), World Health  
37 Organization, Geneva, Switzerland  
38  
39  
40  
41  
42  
43  
44  
45  
46  
47  
48  
49  
50  
51  
52  
53  
54  
55  
56  
57  
58  
59  
60

## Abstract

**Introduction:** Patients have contributed <1% of spontaneous adverse drug reaction (ADR) reports in Uganda's pharmacovigilance database. Peer support combined with mobile technologies could empower people living with HIV (PLHIV) to report ADRs and improve ADR management through linkage to care. We seek to test the feasibility and effect of a peer support intervention on ADR-reporting by PLHIV receiving combination antiretroviral therapy (cART) in Uganda; identify barriers and facilitators to the intervention; and characterise ADR-reporting and management.

**Methods and analysis:** This is a quasi-experimental study to be implemented over 4-months at 12 intervention and 12 comparison cART-sites from four geographical regions of Uganda. Per region, two blocks each with a tertiary, secondary and primary care cART-site will be selected by simple random sampling. Blocks per region will be randomly assigned to intervention and comparison arms.

Study units will include cART-sites and PLHIV receiving cART. PLHIV at intervention sites will be assigned to peer supporters to empower them to report ADRs directly to the National Pharmacovigilance Centre (NPC). Peer supporters will be expert clients from among PLHIV and/or recognized community health workers.

Direct patient-reporting of ADRs to NPC will leverage the Med Safety App and toll-free Unstructured Supplementary Service Data interface to augment traditional pharmacovigilance methods.

The primary outcomes are attrition rate measured by number of study participants who remain in the study until the end of follow-up at 4 months; and number of ADR reports submitted to NPC by PLHIV as measured by questionnaire and data abstraction from the national pharmacovigilance database at baseline and 4 months.

**Ethics and dissemination:** The study received ethical approval from: School of Health Sciences Research and Ethics Committee at Makerere University (MAKSHSREC-2020-64) and Uganda National Council for Science and Technology (HS1206ES). Results will be shared with PLHIV, policy-makers, the public and academia.

**Trial registration:** ISRCTN75989485

### Strengths and limitations of the study

The study will blend a novel peer support intervention with mobile data transmission technologies to promote the detection and reporting of suspected adverse drug reactions (ADRs) by people living with HIV

People living with HIV who experience serious ADRs will be linked directly to health facilities for ADR management

An implementation research approach will be employed to identify the factors that could influence the uptake of peer support in patient-reporting of ADRs while documenting predefined outputs and outcomes relevant to the research objectives

The study will generate pilot data on effect sizes to aid the planning of future randomized controlled trials using peer support to promote patient-reporting of ADRs

## Introduction

Adverse drug reactions (ADRs) are a leading cause of morbidity, mortality and increased healthcare costs[1-3]. The timely detection and reporting of ADRs promotes their appropriate management, more accurate prediction and prevention[4]. Pharmacovigilance systems worldwide have identified and led to withdrawal from the market of at least 462 harmful medicines, primarily through passive spontaneous ADR-reporting by healthcare professionals (HCPs)[5], thereby contributing to patient safety. The major drawback of the spontaneous pharmacovigilance system is its reliance on individual HCP motivation. It is estimated that only about 10% of ADRs are reported through the spontaneous pharmacovigilance system, which is a very low rate of ADR-reporting[6-8]. Several factors hinder ADR-reporting by HCPs including medical specialty, lower-level healthcare facility, older HCP age, heavy workloads, shortage of reporting tools, ignorance and fear of litigation[8, 9].

Patient-reporting of suspected ADRs is given little attention in developing countries. Yet, patients are a known complementary source of pharmacovigilance data[10-12]. Patients can make detailed ADR-reports and with similar quality as ADR-reports from HCPs. Patients can also report previously unknown ADRs[13]. Thus, patients are well-placed to participate in ADR-reporting because they have first-hand experience of their own state of health and treatment. Patient involvement in ADR-reporting aligns with the increasing global momentum towards patient-centred healthcare[14]. Yet, patient participation in pharmacovigilance is under-explored with little empirical data, especially in low- and middle-income countries (LMICs). In Uganda, patients' contribution to ADR-reporting is very low indeed and is estimated at less than 1% of the reports in the national pharmacovigilance database (Victoria Nambasa, Pharmacovigilance Manager at National Drug Authority (NDA); personal communication; 6 April 2020).

The quest for expanded avenues to increase the reporting of suspected ADRs has never been more apparent than in Uganda where dolutegravir (DTG) and Isoniazid Preventive Therapy (IPT) have been massively rolled-out since 2018 and 2019, respectively. Anecdotal evidence in Uganda suggests that increased use of DTG and IPT has increased the burden of associated serious ADRs e.g. hyperglycaemia, hepatotoxicity and neuropsychiatric effects[15, 16]; necessitating a more robust pharmacovigilance system that leverages patient-reporting of suspected ADRs to DTG-regimens and/or IPT. This study proposes to test the feasibility and effect of a peer support intervention combined with mobile phone-based tools to promote the reporting of ADRs by people living with HIV (PLHIV) on DTG-based ART and/or IPT in Uganda. If successful, this study will contribute to the development of a more robust pharmacovigilance system to better document serious ADRs in Uganda.

Patient-centred peer support has shown promise in the management of chronic illnesses such as diabetes and mental health[17, 18]; and in improving retention in HIV care and adherence to ART[19, 20]. Thus, peer support could substantially promote the detection, reporting and management of ADRs amongst PLHIV. In the current study, peer support is based on the premise that PLHIV who have previously experienced ADRs linked to ART can – as peer supporters - encourage, mentor and support other similarly affected but less experienced PLHIV to detect and report ADRs[21]. Peer supporters could serve as positive role models to improve the self-efficacy of other PLHIV whom they could guide to identify and report ADRs using the available tools. Direct patient-reporting of ADRs could utilize the Med Safety mobile application, a toll-free Unstructured Supplementary Service Data (USSD) interface and the

1  
2  
3 traditional pharmacovigilance methods of paper-form, online forms and voice call. The aim  
4 remains to have all suspected ADR reports submitted to the National Pharmacovigilance  
5 Centre (NPC) database for analysis and subsequent processing. However, those that require  
6 clinical management should be brought to the attention of the HCP for appropriate  
7 management and prevention[21-23]. From guiding less experienced PLHIV, expert clients  
8 serving as peer supporters could equally be empowered to build their own self-esteem[24,  
9 25].  
10  
11

12 Our peer support intervention for strengthening the Ugandan pharmacovigilance system  
13 through patient-reporting of ADRs is intended to leverage the available mobile technologies  
14 e.g. the USSD platform available for both low-tech non-smartphones and high-tech  
15 smartphones[26]; and the Med Safety mobile application for high-tech smartphones[27].  
16 USSD is a real-time text-driven technology which allows users to interact directly from their  
17 mobile phones by making a selection from a menu. It allows for faster two-way communication  
18 of information and enables rapid exchange of data - up to seven times faster than SMS[28].  
19 The USSD interface has been a key success factor in the extensive penetration of mobile  
20 money banking in rural unbanked sub-Saharan Africa[29]. No Internet connection is needed.  
21 This project's toll-free USSD code has been developed by a private Ugandan software  
22 company[30]. Med Safety is a smartphone mobile application for ADR-reporting that was  
23 recently adapted for LMICs from the prototype app funded by the European Union's Innovative  
24 Medicines Initiative – the WEB-RADR project. Adaptation of the mobile app is led by UK's  
25 Medicines and Healthcare products Regulatory Agency in collaboration with World Health  
26 Organization (WHO) and the WHO Collaborating Centre for International Drug Monitoring, the  
27 Uppsala Monitoring Centre (UMC)[31]. Med Safety was launched in Uganda in February 2020.  
28 Using both USSD and Med Safety alongside existing pharmacovigilance methods could  
29 strengthen peer support-enhanced patient-driven pharmacovigilance in Uganda.  
30  
31  
32  
33  
34

35 Lastly, the study will use an implementation science approach to evaluate the peer support  
36 intervention among PLHIV. Implementation research is critical in identifying factors that could  
37 influence uptake of the intervention while documenting predefined outputs and outcomes  
38 relevant to the research objectives[32]. Our ultimate goal is to increase patient reporting of  
39 ADRs in LMICs such as Uganda with weak pharmacovigilance systems. Hence, this study  
40 aims to develop and assess the feasibility of a peer support intervention combined with mobile  
41 phone-based tools to promote the detection and reporting of ADRs in PLHIV on DTG-based  
42 ART and/or IPT in Uganda. It will identify the barriers and facilitators to implementing the  
43 intervention, characterise ADR-reporting and management and estimate the effect of the  
44 intervention on ADR-reporting among PLHIV.  
45  
46  
47

## 48 **Research hypotheses and objectives**

### 49 Research hypotheses:

50 We hypothesize that the patient-centred peer support intervention combined with existing  
51 mobile data transmission technologies for promoting the detection, reporting and management  
52 of ADRs in PLHIV is feasible and acceptable. We also hypothesize that this peer support  
53 intervention combined with mobile data transmission technologies will significantly increase  
54 the number of ADR reports submitted to NPC by PLHIV who receive the intervention during  
55 4-months of follow-up when compared with PLHIV who do not receive the intervention.  
56  
57  
58  
59  
60



1  
2  
3 Specific objectives:

- 4 1. To develop a peer support intervention combined with mobile data transmission  
5 technologies to promote the detection, reporting and management of ADRs in PLHIV  
6 receiving DTG and/or IPT in Uganda  
7  
8 2. To explore the barriers and facilitators to implementation of the peer support  
9 intervention combined with mobile data transmission technologies to promote ADR  
10 detection, reporting and management among PLHIV on DTG and/or IPT in Uganda  
11  
12 3. To describe the patterns of ADR-reporting (number, rate, quality, time to reporting,  
13 seriousness etc.) by PLHIV receiving DTG and/or IPT in whom the peer support  
14 intervention combined with mobile data transmission technologies is implemented in  
15 Uganda  
16  
17 4. To estimate the effect of the peer support intervention combined with mobile data  
18 transmission technologies on the rate of ADR-reporting by PLHIV receiving DTG  
19 and/or IPT in Uganda  
20  
21  
22  
23  
24  
25  
26  
27  
28  
29  
30  
31  
32  
33  
34  
35  
36  
37  
38  
39  
40  
41  
42  
43  
44  
45  
46  
47  
48  
49  
50  
51  
52  
53  
54  
55  
56  
57  
58  
59  
60

## Methods

### Study setting

Uganda has a tiered healthcare system with different levels of healthcare from the National Referral Hospitals which provide tertiary and super-specialized healthcare, through Regional Referral Hospitals (RRHs), General Hospitals, level IV Health Centers (HC IV), level III Health Centers (HC III), to level II Health Centers (HC II) that progressively offer less scope and breadth of health services to out-patient services[33]. HIV treatment and care is provided from HC III and upwards giving a total of 1,832 accredited centers that provide ART services in Uganda. Uganda adopted the Differentiated Service Delivery Models (DSDM), where stable clients have less frequent clinical assessment visits. In 2019, about 80% (1,466/1,832) of the ART accredited sites and 78% (975,675/1,241,478) of PLHIV on ART had access to the DSDM model. An additional, 12% (114,363/975,675) of clients enrolled on DSDM received ART services from the community through Community Drug Distribution Points (CDDP) and Community Client-Led ART Distribution (CCLAD)[34].

Uganda has an estimated 1.46 million PLHIV, of whom prevalence among people aged 15 to 49 years is 5.8% with women having a higher prevalence (7.1%) than men (4.3%). Among the PLHIV, 93% are aged  $\geq 15$  years and 60% of the HIV-infected adults are women. In 2019, there were 53,413 new HIV infections of which 40,000 were among adults and 21,000 Ugandans died of AIDS-related illnesses[35]. Following the “Test and Treat” policy for HIV adopted in 2016 and scaled up in 2017, the ART coverage was at 89% in 2019. Approximately 96% of PLHIV on ART are taking first-line regimens and >443,000 PLHIV are on TLD. About 17% of PLHIV are ART-naïve at treatment initiation. In 2019, about 41% of TB patients were HIV-positive and 97% of HIV-positive TB patients were receiving ART[35, 36]. By the end of 2019, 477,190 of PLHIV were enrolled on IPT. Strategies to strengthen pharmacovigilance were instituted as part of DTG/IPT roll-out in the 2020 revised Consolidated Guidelines for Prevention and Treatment of HIV and AIDS in Uganda[16]. The guidelines support ADR identification, monitoring and reporting, particularly for DTG and IPT. Pharmacovigilance sentinel sites were established at 18 sentinel sites (RRHs and Centers of Excellence). These ART-sites received training and ADR-reporting tools. ADRs are reported to the NPC at NDA through a paper-based system, online system, toll-free phone line or through NDA's Med Safety App.

For the current study, the authors have divided the country into four geographical regions to establish a sampling framework that leads to selection of national level representation of health facilities and factors that influence provision of care to PLHIV and their pharmacovigilance-related needs. In each region, two blocks of health facilities with ART-sites will be selected of which one block will implement the intervention and the other will serve as the comparison block of health facilities. Each block will consist of an ART-site at a RRH (tertiary care), a HC IV (secondary care) and HC III (primary care), respectively. Therefore, 12 intervention ART-sites will be matched by level of care and region with 12 comparison ART-sites from the four regions of Uganda.

### Study design

The study will employ a quasi-experimental design with pre-post and there-there comparisons to measure the preliminary impact of the peer support intervention on ADR-reporting by PLHIV, **Figure 1**. The study will use both quantitative and qualitative methods to triangulate the research findings. The qualitative research methods aim to understand the barriers and

1  
2  
3 facilitators to implementing the peer support intervention for promoting ADR detection,  
4 reporting and management from the perspective of PLHIV and in the context of their interface  
5 with Uganda's healthcare system[37] and thus they will be predominantly implemented in the  
6 intervention arm. We will explore the experiences of PLHIV in the utilization of the peer support  
7 intervention and elicit their preferences to further refine the intervention and implementation  
8 strategy.  
9

### 10 11 The intervention

12 The peer support intervention leverages mobile data transmission technologies (Med Safety,  
13 USSD) in addition to traditional pharmacovigilance methods (paper, online, voice call). The  
14 peer support mechanism has several layers of supervision from the mentored PLHIV, through  
15 peer supporters, peer supervisors, study coordinator to study investigators at the top of the  
16 hierarchy, see **Figure 2**.  
17  
18

19 The PLHIV to be mentored in the intervention arm will be assigned to peer supporters to guide  
20 their ART care for 4-months. The peer supporters will constitute a mixed group of lay people,  
21 namely; i) expert clients who are PLHIV with more experience in the use of ART and, ii)  
22 recognized community health workers (CHWs). Most CHWs in Uganda's HIV programs are  
23 expert clients. Thus, it is possible to recruit CHWs all of whom are expert clients. Peer  
24 supporters in the intervention arm will guide the mentored PLHIV to report ADRs to NPC and  
25 improve the latter's healthcare-seeking behaviour. The PLHIV should own mobile phones.  
26  
27

28 The PLHIV to be mentored will be identified by verbal communication/ written announcements  
29 on noticeboards at the study sites and matched with the respective peer supporters of similar  
30 age, gender and proximity of residence. The non-random matching of PLHIV to peer  
31 supporters is intended to promote easier and faster bonding of the peer-relationships. Five (5)  
32 PLHIV will be assigned to one (1) peer supporter from the same community. A weekly  
33 (minimum fortnightly) face-to-face/phone call interaction will be held between a peer supporter  
34 and each assigned PLHIV. Thus, a peer supporter will be expected to interact with one PLHIV  
35 per day and five PLHIV in five days each week. Each PLHIV to be supported will be introduced  
36 to an assigned PLHIV by the research team and focal health facility staff. The procedure for  
37 the weekly interaction will be illustrated to the PLHIV-peer supporter pair. The mentored PLHIV  
38 and peer supporter will be provided with the telephone contacts of the study coordinator/ focal  
39 health facility staff whom they could notify at any time when they want to terminate  
40 engagement.  
41  
42  
43  
44

45 Peer supporters will use one-on-one in-person support blended with mobile phone-based  
46 interaction to guide each assigned PLHIV to recognize and report suspected ADRs to NPC.  
47 The peer supporter will also administer a short weekly questionnaire to each assigned PLHIV  
48 regarding ADR experience in the past 1-week.  
49

50 This peer support intervention adapts the "humanizing healthcare model" developed by *peers*  
51 *for progress*, a group that demonstrates the value and best practices of peer support. The  
52 model is based on four functions, namely; assistance in daily management, providing social  
53 and emotional support, linking to clinical and community resources and ongoing support[38],  
54 see **Figure 3**.  
55  
56

57 Both the supported PLHIV and peer supporters will be trained on the following aspects: ART;  
58 how to live positively with HIV; recognition of suspected ADRs and how to report them via Med  
59  
60

1  
2  
3 Safety, USSD or traditional methods (paper, online, voice call) to NPC; and about linkage or  
4 referral to health facility care e.g. when a serious ADR occurs. The supported PLHIV and peer-  
5 supporters will be trained to interact in a manner that ensures confidentiality. The data  
6 generated from Med Safety and USSD will be safeguarded according to applicable laws on  
7 data protection. The linkage to appropriate care of PLHIV by the peer supporter will aim to; i)  
8 promote healthcare-seeking behaviour of the PLHIV, ii) improve the monitoring of HIV  
9 treatment (management of serious ADRs, ART adherence, retention in care), iii) enhance  
10 timely refill of ART prescriptions and/or, iv) provide for any other special care that PLHIV might  
11 require.  
12  
13

14  
15 Peer supporters will be separately trained and skilled in interpersonal interaction to be  
16 responsive to PLHIV and encourage them to identify and report any suspected ADRs. The  
17 training components for peer supporters will include care in chronic illness, ART, adherence  
18 to ART, ADRs, ADR-reporting, care-seeking, counselling and facilitative supervision. Training  
19 for the peer supporters will take up to three days. It will include a one-day didactic session  
20 followed by two days of on-the-job, one-on-one training. In addition to being trained, peer  
21 supporters will receive supplementary educational materials. Four follow-up  
22 supervisory visits/phone calls at two-week intervals will be conducted by the trainers to  
23 reinforce the knowledge, skills and attitudes gained by the peer supporters. Each supported  
24 PLHIV will receive one-day's training during his/her clinic visit which will include a didactic  
25 session and one-on-one discussion in a non-classroom environment. The trainers will be  
26 qualified individuals carefully identified by the project team with the requisite knowledge to  
27 offer the training and expertise in adult learning and counselling.  
28  
29  
30

31 The peer support mechanism will have two additional layers of supervision, see **Figure 2**. The  
32 first level of additional oversight will be provided by four (4) peer supervisors identified from  
33 among the peer supporters at each of the four selected RRHs. Peer supervisors will be  
34 seconded by the study sites and collaborating patient safety groups involved in the recruitment  
35 of peer supporters. Each peer supervisor will oversee 15 peer supporters in his/her region (10  
36 from RRH, 3 from HC IV, 2 from HC III). The peer supervisor will call each peer supporter  
37 twice a month. During these 'booster' sessions, the peer supervisor will review, emphasize  
38 and re-educate peer supporters on expectations of the intervention e.g. setting and reviewing  
39 goals with PLHIV. The second level of oversight will be provided by the project coordinator  
40 who will oversee the four (4) peer supervisors whom he/she will meet/call every month. At  
41 least one study investigator, mostly the principal investigator, will participate in these  
42 meetings/calls. The project coordinator will have the requisite knowledge, skills and  
43 competence to train PLHIV and peer supporters. The project coordinator will provide support  
44 supervision and counselling to motivate the peer supervisors, peer supporters and PLHIV.  
45  
46  
47  
48  
49

#### 50 The comparison group

51 PLHIV in the comparison group will be mobile phone owners who will be trained to recognize  
52 suspected ADRs and report them to NPC via Med Safety, USSD or the traditional  
53 pharmacovigilance methods (paper, online, toll-free voice call) to a peer-supporter, HCP or  
54 NPC, see **Figure 4**. Smartphone owners will be guided to install Med Safety for ADR-reporting.  
55 PLHIV with non-smartphones or smartphone owners who will not install Med Safety will report  
56 ADRs by USSD or the traditional reporting methods. PLHIV in this group will not receive  
57 dedicated peer support.  
58  
59  
60

### Study units, participants and selection

#### Study units and participants:

This study has multiple study units and layers to assess the feasibility of implementation and effect of the intervention on promoting the detection and reporting of suspected ADRs in PLHIV on DTG-based ART and/or IPT in Uganda. From micro to macro-level, the study units include PLHIV receiving DTG-regimens and/or IPT; the pair of PLHIV and peer supporter; the peer supporter; the combination of the PLHIV with peer supporter and ART-site; peer supervisor; the pair of peer supervisor and peer supporter; and the ART-site. At the study ART-site, HCPs and health facility managers will be included. Lastly, the reporting of suspected ADRs by PLHIV, peer supporters, HCPs and ART-sites to the NPC will also be examined.

About 17% of PLHIV are ART-naive, 95% are aged 15 years and older, and 89% receive first-line ART either as treatment-naive or treatment-experienced PLHIV[36].

#### Eligibility criteria:

*Inclusion criteria:* Selection of study units will occur at three levels: *First*, eligible PLHIV should i) be aged  $\geq 15$  years, ii) receive ART at the selected study sites, iii) own a mobile phone (smartphone, basic feature phone) and, iv) provide written/thumb-printed informed consent. Child consent can be given by emancipated minors aged 15 to 17 years in Uganda[39] *Second*, eligible peer supporters (expert clients, CHWs) will be those that are recognized and seconded by the study sites or collaborating patient safety groups. These peer supporters will be those that are attached to the study sites and have already received institutional training in their role as expert clients/CHWs; they should own mobile phones. A focal clinical staff assigned to the study by the health facility administration will approach and recruit the peer supporters. The recruited peer supporters will be screened by the research team to gauge their ability to be peer supporters e.g. the ability to use the Med Safety App/USSD, ability to read and write in English and good interpersonal skills. Satisfactory peer supporters will give written informed consent. Peer supporters will participate only in the intervention arm of the study. *Third*, study health facilities will be selected and enrolled as follows; in each of the four geographical regions, blocks of three health facilities each with an ART-site, including at least a RRH, HC IV and HC III will be created based on the catchment of each RRH. From the created blocks of three health facilities in each region, two blocks will be selected by simple random sampling to participate in the study as the intervention and comparison health facilities, respectively. This will give 24 ART-sites consisting of 12 intervention sites (4 RRHs, 4 HC IVs, 4 HC IIIs) matched by level of care and region with 12 comparison sites (4 RRHs, 4 HC IVs, 4 HC IIIs) selected from the four geographical regions of Uganda.

*Exclusion criteria:* Exclusion will apply only at the level of PLHIV and CHWs. We shall exclude PLHIV on ART for < 6-months and expert clients/ CHWs who will be unable to commit, from the outset, at least 5-hrs per week to the study for up to 4-months.

Many ADRs happen when starting ART although such PLHIV tend to be unstable on treatment. The priority of this pilot is to understand the dynamics (feasibility and acceptability) of the peer support intervention in a *stable group* of PLHIV on ART (for  $\geq 6$  months). If found to be feasible, the peer support intervention will be introduced, in future initiatives, to the *unstable group* of PLHIV on ART (for <6 months).

### Sample Size and Sampling Considerations

Sample size computation is based on the possible effect of the peer support intervention on the rate of ADR-reporting by PLHIV, with adjustment for clustering. We assume a conservative intra-cluster correlation coefficient of 0.045 and a priori increase of 50% in the rate of ADR-reporting to NDA, from 6 ADR-reports per 100 person-years at baseline[40] to 9 ADR-reports per 100 person-years at end-line evaluation. We assume a standard deviation of 12 ADR-reports per 100 person-years computed from the monthly ADR-reports submitted to NPC for one-year (October 2018 to September 2019). The study is designed to have at least 80% power to estimate an effect size of 1.5. Thus, 126 PLHIV will be required in the intervention arm and 126 PLHIV in the control arm.

Since the caseload for each peer supporter will be 5 PLHIV in the intervention arm, 60 peer supporters (15 from each of the 4 regions) will be responsible for 300 PLHIV on DTG and/or IPT. Thus, the peer support arm will include 300 PLHIV and the control arm 300 PLHIV all of whom should own functional mobile phones (smartphone or non-smartphone or both). Thus, a total of 600 PLHIV will be enrolled; 400 from RRHs, 120 from HC IVs and 80 from HC IIIs.

The PLHIV will be enrolled consecutively until the required sample size is attained. Smartphone owners will be guided to install Med Safety for ADR-reporting. We assume that 7 in 10 PLHIV at the ART-sites will have mobile phones and only one in 10 will possess smartphones[41]. Thus, only up to 10% (or 60) of PLHIV with smartphones will be helped (with maximal support from peer supporters) to download Med Safety. The rest of the 540 PLHIV without smartphones or smartphone owners who will not install Med Safety will report ADRs by USSD or the traditional methods.

### Study variables

*Primary outcomes:* Feasibility of the peer support intervention - attrition rate recorded as the number of study participants who remain in the study until the end of follow-up at 4 months; Number of suspected ADR reports submitted to NPC by PLHIV as measured by questionnaire and data abstracted from the national pharmacovigilance database at baseline and 4 months

*Other process/output/outcome variables:*

1. Acceptability of the peer support intervention measured using a questionnaire and qualitative interviews at 4 months post-intervention
2. Barriers/facilitators of the peer support intervention measured using a questionnaire during the intervention and qualitative interviews at 4 months post-intervention
3. Fidelity to the peer support intervention measured using a questionnaire and qualitative interviews at 4 months post-intervention
4. Rate of ADR-reporting to NPC by PLHIV as measured by questionnaire and data abstraction from the national pharmacovigilance database at baseline and 4 months
5. Quality of ADR-reports by PLHIV measured by questionnaire and data abstraction from the national pharmacovigilance database at baseline and 4 months
6. Time to ADR-reporting to NPC by PLHIV since enrolment measured by questionnaire and data abstraction from the national pharmacovigilance database during 4 months
7. Time from ADR onset to registration in the national pharmacovigilance database measured by questionnaire and data abstraction from the database during 4 months
8. Health-related quality of life measured by questionnaire at baseline and 4 months
9. Management of ADRs recorded using a questionnaire during the 4 months
10. Number of PLHIV linked to health facilities by peer supporters for ADR management as measured by questionnaire during the 4-month intervention period

11. Health-seeking behaviour measured using a questionnaire at baseline and 4 months
12. Self-efficacy to report ADRs measured by questionnaire at baseline and 4 months
13. Self-reported ART adherence measured by questionnaire at baseline and 4 months
14. Mood (positive/ negative affect) measured by questionnaire at baseline and 4 months

## Patient and Public Involvement

Direct involvement of PLHIV in the detection and reporting of suspected ADRs, and patient safety groups in recruitment of PLHIV, will have value in improving the public's awareness of ADRs and the available pharmacovigilance tools (Med Safety, USSD, toll-free voice call, etc.). Together, these will be essential for ensuring that changes to clinical practice to promote patient safety based on our work are acceptable to the public.

The study team will work with PLHIV to assess whether the available pharmacovigilance tools meet their needs, to identify potential improvements and to understand facilitators and barriers to using these pharmacovigilance tools. Wider public input into the refinement of the tools and mechanisms to encourage uptake will add value to our work. This work will also be of value to the wider public as Med Safety can be used to report ADRs to any drug, and users can receive drug safety information directly from NPC.

## Data management and statistical analysis

### Quantitative data

**Data collection and management:** Baseline and end-line semi-structured questionnaires will be administered to the PLHIV and peer supporters (expert clients) in the intervention arm and PLHIV only in the comparison arm.

The baseline questionnaire will record socio-demographics (age, sex, monthly income, education level, residence) of all study participants. Clinical details (ART adherence; ADRs; ART-regimen; ART-status i.e. first-line, second-line, third-line; duration on ART; comorbidities) and healthcare-seeking behaviour of study PLHIV will be measured. Data will be transmitted to a password-protected online database via the Open Data Kit (ODK) suite of tools. Participating PLHIV will be asked at enrolment if they experienced suspected ADRs in the 4-months preceding the study. The self-reported suspected ADRs will be corroborated with additional information on documented suspected ADRs from retrospective clinical chart review of the 4-month period prior to study enrolment. The clinical charts will be accessed by the health facility staff.

**Additional data collection for the intervention group:** On a weekly basis for up to 4-months, peer supporters will inquire from each assigned PLHIV (during a 1 hour face-to-face or phone call interaction) if he/she experienced one or more suspected ADR(s) and if the ADR had any impact on quality of life and/or ART adherence. Peer supporters will document if the ADR(s) was/were reported; and, if reported, by which means (Med Safety, USSD, voice call, other methods). Peer supporters will document all ADRs experienced by the PLHIV during the previous 1-week (using a tool designed to capture the medicines and ADRs); and will guide the PLHIV to report ADRs directly to NPC using the available pharmacovigilance methods. Active surveillance of ADRs linked to DTG and/or IPT will be prioritized but ADRs linked to other medicines will also be documented. PLHIV who experience serious ADRs will be linked directly to the health facilities where they receive ART for ADR management. Peer supporters will refer serious ADR cases to peer supervisors who will, in turn, refer these cases to focal clinical staff assigned to the study by the health facility administration; usually stationed at

1  
2  
3 triage to connect the cases to clinicians. We will document the management of serious and  
4 non-serious ADRs (number of serious and non-serious ADR cases referred for health facility  
5 management; actions taken by health facilities in the management of serious and non-serious  
6 ADRs e.g. stopping treatment, changing treatment, continuing treatment with adherence  
7 counselling, doing nothing, etc.).

8  
9 The end-line questionnaire for PLHIV will measure their healthcare-seeking behaviour, linkage  
10 to care for ADR management and adherence to ART. The PLHIV will also be asked to report  
11 their experiences while receiving peer support to assess the intervention's feasibility and  
12 acceptability (e.g. user satisfaction). The study will also assess the participants' experiences  
13 when using the various pharmacovigilance methods (Med Safety, USSD, toll-free voice call,  
14 etc.). We shall assess the ease of use, language and costs of the available pharmacovigilance  
15 methods (Med Safety, USSD, toll-free voice call, etc) alongside peer support.  
16  
17

18  
19 **Med Safety App and USSD data collection:** PLHIV will submit ADR-reports via Med Safety  
20 and/or USSD with initial assistance from peer supporters. Each app-based ADR-report will be  
21 automatically converted into the standard E2B (R2) format prior to its receipt in the Vigilance  
22 Hub[42]. The app is hosted by Uganda's NDA which manages the reported ADR data. For  
23 USSD reporting, PLHIV will dial the USSD code and answer a set of questions. The data will  
24 be stored in real-time on a dashboard accessible to the project staff.  
25

26  
27 **Statistical analysis:** All ADR-data in both the national and project databases and received  
28 from the study sites during the study period will be exported into Stata version 15.0 MP for  
29 descriptive analysis – frequencies, proportions and their 95% confidence intervals (StataCorp  
30 LLC, College Station, Texas). Duplicate ADR-reports will be identified and analysed  
31 accordingly. Summary estimates will be reported by pharmacovigilance method (Med Safety,  
32 USSD, toll-free voice call, etc.).  
33

34  
35 To assess the feasibility to retain peer supporters and PLHIV, we shall compute the attrition  
36 rate which is the proportion of study participants who remain in the study until the end of follow-  
37 up at 4 months.  
38

39  
40 The number of suspected ADRs reported to NPC by the PLHIV overall and in each study arm  
41 will be described by subgroup: serious ADR (yes/no); peer supporter guided (yes/no); DTG-  
42 linked (yes/no); IPT-linked (yes/no); DTG/IPT-linked (yes/no); linked to other medicines  
43 (yes/no); level of reporting (PLHIV, peer supporter, HCP, health facility) etc.  
44

45  
46 The rate of ADR-reporting ( $m_a$ ) by PLHIV (per site, overall) per completed-month ( $m_1$ ) of follow-  
47 up will be computed as follows:  $m_a = [n_a \text{ reports}/(N_a \text{ completed-months of follow-up})]$ , where  
48  $n_a$  is the number of reported ADRs and  $N_a$  the number of completed-months of follow-up.  
49 Reporting rates of same-day ADR-onsets will be documented; and time from ADR-onset to  
50 registration in the national database recorded for all other events[33]. Time to ADR-reporting  
51 to NPC for a PLHIV will be the time from the day a PLHIV is enrolled into the peer support  
52 intervention to the time he/she reports the first suspected ADR to NPC. Time-to-event data  
53 will be analysed by survival analysis techniques.  
54

55  
56 We will explore the influence of level of care on the uptake of the peer support intervention in  
57 Uganda's healthcare system - such as whether rolling it out at primary care facilities or tertiary  
58 hospitals influences uptake.  
59  
60



1  
2  
3 The change in outcome measures (e.g.) between pre- and post-intervention in PLHIV will be  
4 assessed using a linear mixed model with random effect for peer supporter. Random effect  
5 will be included to account for clustering of PLHIV with peer supporters. The ICC will be  
6 estimated from this model. Since supporters are a mixed population of expert clients and  
7 CHWs, a stratified analysis will be conducted. To aid the planning of future randomized  
8 controlled trials from this pilot's data, we shall report effect sizes.  
9  
10

### 11 Qualitative data

12 **Data collection:** Post-intervention, a combination of focus group discussions (FDGs), in-  
13 depth interviews (IDIs) and Key Informant Interviews (KIIs) will be conducted with purposively  
14 selected study participants. A lead qualitative researcher will be assisted by two well-trained  
15 research assistants. Semi-structured interviews informed by the Consolidated Framework for  
16 Implementation Research (CFIR)[43] will be used to elicit participants' perspectives on the  
17 facilitators and barriers to implementing the peer support intervention at four purposively  
18 selected health facilities.  
19  
20

21 We will conduct six FDGs with three categories of PLHIV in the intervention arm; two with  
22 those enrolled in Community Drug Distribution Points (CDDPs), two in Community Client-Led  
23 ART Delivery (CCLAD) and two in facility-based ART delivery models.  
24  
25

26 A total of 12 IDIs will be conducted with peer supporters (expert clients, CHWs) attached to  
27 each of the three ART delivery models; a) CDDP, b) CCLAD, c) Facility-Based, see **Figure 5**.  
28  
29

30 Four KIIs will be conducted with HCPs/facility managers with insights in the implementation  
31 experience of the peer support intervention at their respective host facilities from an  
32 organizational-context.  
33

34 As a first step, participants will complete a written informed consent form. We will then capture  
35 baseline characteristics: age, gender and educational level. A CFIR-informed semi-structured  
36 guide will be used for the interviews. The semi-structured guide will explore participants'  
37 experiences with the peer support intervention, their preferences and suggestions for  
38 improvement of the intervention and the challenges encountered in using USSD and/or Med  
39 Safety. On average, the duration of the FDGs and IDIs will be approximately 45-60 min. The  
40 FDGs, IDIs and KIIs will be conducted until theoretical saturation is reached. Theoretical  
41 saturation means that no new knowledge is generated and all aspects of a theory are covered.  
42 All the data generated from the focus groups and interviews will be explored for themes and  
43 sub-themes.  
44  
45  
46

47 **Guiding qualitative analytical framework:** The CFIR will be adopted as the overall guiding  
48 analytical framework for this study. The CFIR is a comprehensive 'meta-theoretical'  
49 implementation research framework compiled from more than 20 sources and is cross-cutting  
50 in more than 13 scientific disciplines; it guides systematic assessment of multi-level  
51 implementation settings to identify factors that influence intervention implementation and  
52 effectiveness [44]. The CFIR informs the conceptualization of this study, will guide the  
53 development of data collection tools and will serve as an overarching deductive thematic  
54 framework in analysis of study findings and the overall synthesis and interpretation of results  
55 for this study. The CFIR is widely-applied because of its multi-level, 'ecological' dimensions  
56 on multi-faceted influences on healthcare intervention implementation outcomes[45]. The  
57 CFIR has been applied across diverse interventions and varied content fields[44].  
58  
59  
60

1  
2  
3 More specifically, the CFIR-derived domains that will guide the study are the following:

4 *Intervention characteristics:* Implementation of the peer support intervention could potentially  
5 be impacted by factors including its perceived effectiveness in ADR-reporting, relative  
6 advantages over alternative reporting approaches, adaptability in varied resource-constrained  
7 settings, trialability, complexity, design quality and presentation, and cost-effectiveness.  
8  
9

10 *Outer setting:* external influences on implementation of peer support may include external  
11 policies and incentives, socio-cultural belief systems, peer pressure dynamics and socio-  
12 economic context.  
13

14 *Inner setting:* characteristics of the implementing organization (or host health facility) such as  
15 organizational culture, the relative priority assigned to the peer support intervention (including  
16 funding support), presence of intervention 'champions', availability of supportive administrative  
17 or physical infrastructure, congruence with host organization's mission and vision, quality of  
18 leadership support and implementation climate(s).  
19  
20

21 *Characteristics of individuals:* Patients' beliefs, knowledge, level of income, self-efficacy, and  
22 personal attributes that may affect the implementation and uptake of the peer support  
23 intervention.  
24  
25

26 *Process of implementation:* Influences on implementation outcomes may derive from different  
27 implementation phases involved in roll-out of the peer support strategy such as degree and  
28 quality of involvement of primary beneficiaries in designing the intervention, planning,  
29 execution, degree of effectiveness of monitoring and evaluation strategies and presence of  
30 key intervention stakeholders and influencers including opinion leaders, stakeholder  
31 engagement, and intervention champions.  
32  
33

34 The CFIR will be used to identify barriers and facilitators of the peer support intervention for  
35 promoting ADR-reporting by PLHIV.  
36

37 **Data analysis:** Our qualitative data analysis will follow the procedures recommended by Miles  
38 & Huberman (1994)[46]. Interviews and FGDs will be audio-recorded and transcribed verbatim  
39 into text transcripts by three research assistants (and translated into English where  
40 necessary). Data will be analysed, in an iterative process, involving four major steps:  
41  
42

43 a) *Data familiarization:* An experienced qualitative researcher and one other investigator will  
44 read the interview transcripts multiple times for data familiarization.  
45

46 b) *Developing a coding framework:* We shall adopt the five CFIR-derived domains  
47 (*Intervention characteristics, outer setting, inner setting, characteristics of individuals, and*  
48 *process of implementation*) as an overarching deductive thematic framework, combined with  
49 an inductive approach based on the data[47].  
50

51 c) *Data abstraction:* The coded data will be categorized into thematic categories.  
52  
53

54 d) *Overall interpretation and synthesis:* Our overall synthesis of study findings will adopt a  
55 team-based process of peer-debriefing involving all investigators to resolve disagreements in  
56 interpretation of study findings.  
57  
58  
59  
60

### Quality assurance

To ensure uniform study procedures and high-quality data, all research assistants recruited for the study will receive face-to-face training on the following: the informed consent process, participant interviewing techniques, confidentiality issues, pharmacovigilance, use of the Med Safety App, use of the USSD, ADRs, use of the Open Data Kit (ODK) software for data entry into an online password-protected database; and qualitative and quantitative study designs, among others.

The FGDs and KIs will be led by an expert in qualitative research. Research assistants with prior training in qualitative research methods will also be hired for the qualitative study component. All research assistants will receive face-to-face training in both qualitative and quantitative research methods.

Questionnaire data will be transmitted through ODK to an online database by the research assistants while still in the field. The study statistician will check the online data for integrity and contact field staff as soon as possible while still in the field to correct any data entry errors. Prior to entry into ODK, all research assistants shall be required to cross-check the data on study questionnaires to eliminate errors and ensure data completeness.

### Results uptake and use

*Outcomes/Impact/Outreach:* The peer support intervention is expected to increase patient-reporting of ADRs to NPC. It is anticipated that the patients will subsequently; i) find it easier and faster to report ADRs (including DTG- and IPT-related reactions) anywhere and at any time using their mobile phones and, ii) receive medication-safety alerts directly from NPC to their phones. We expect this project to promote pharmacovigilance in Uganda by improving; i) the exchange of medication-safety information between patients, peer supporters, HCPs and NPC, ii) the awareness of pharmacovigilance by patients and the public through the mobile phone and other awareness campaigns and, iii) the rate of ADR-reporting by patients.

*Potential impact on policy or programs:* This project could foster the increased involvement of patients in pharmacovigilance activities and improve the efficiency of pharmacovigilance systems in Uganda with real-time monitoring of DTG and INH safety in PLHIV in the first instance, thus, increasing the volume of analysable data for quick decision-making by both clinicians and policy makers.

We expect to promote collaboration between consumers/public and the NPC, national AIDS Control Program - Ministry of Health and the National TB and Leprosy Control Programme (NTLP). The accumulation of relevant medication-safety data from spontaneous and active ADR-reports permits robust detection of safety signals at the national and international levels.

*Scalability:* After this pilot project, we expect the peer support intervention to be tested in a nationwide randomized controlled trial; and the USSD and Med Safety App to be modified accordingly and implemented at all 1,832 ART-sites in Uganda to complement the existing active and passive pharmacovigilance methods for ART and TB treatment. We hope to embed peer support in routine pharmacovigilance practice to promote the detection and reporting of ADRs by PLHIV in Uganda. The Med Safety App is available in English and will be subsequently translated into other local languages according to need.

1  
2  
3 The USSD and Med Safety are potentially invaluable tools for the pharmacovigilance of drugs  
4 used for other diseases e.g. non-communicable diseases like cancers, diabetes mellitus,  
5 hypertension etc.  
6

7  
8 Peer support, USSD and Med Safety will be scaled-up to support spontaneous ADR-reporting  
9 in both public and private health facilities at all levels of healthcare ranging from hospitals,  
10 medical centres and clinics to pharmacies and drug shops, not least, the general public.  
11

12 The pharmacovigilance data at NPC could be linked with the patients' clinical data at ART-  
13 sites, stock consumption data from the Supply Management Chain system; and the electronic  
14 Health Management Information System. Machine learning/artificial intelligence analytical  
15 techniques could then be used on big data in the near future to foster improved systems.  
16

17  
18 *Sustainability:* Peer support to promote the detection and reporting of ADRs by PLHIV can be  
19 embedded in the HIV/AIDS program of Uganda just as community engagement programmes  
20 have been successful in Maternal and Child Health programmes; and are being rolled out in  
21 the COVID-19 Community Engagement Strategy and the Young people and Adolescent Peer  
22 Support Model for improving HIV care and treatment outcomes for Adolescents and young  
23 PLHIV of 2019 in Uganda[48, 49]. The USSD and Med Safety will be integrated into NPC's  
24 routine pharmacovigilance functions to complement existing pharmacovigilance methods.  
25 Regional pharmacovigilance centres have pharmacovigilance focal persons who will continue  
26 to support the NPC. All ADR-reports received by NPC are reviewed and submitted into an  
27 existing national medication-safety database. The equipped peer supporters are a valuable  
28 resource for scaling up peer support in the ART-sites after the study is concluded.  
29  
30

31  
32 The USSD interface and Med Safety will be freely available. Med Safety can be downloaded  
33 and installed from both Google Play and Apple iOS stores. NPC pays the salaries of its full-  
34 time pharmacovigilance staff who receive and process the reported medication-safety data.  
35

36 The research collaboration between Makerere University's Department of Pharmacology,  
37 Department of Pharmacy, NPC, ACP, MHRA and other stakeholders will continue to source  
38 for additional research grants to support the future scale-up of evidence-based digital  
39 pharmacovigilance in Uganda. The findings could be helpful to other countries to inform their  
40 own pharmacovigilance activities.  
41  
42

### 43 **Dissemination**

44  
45 Med Safety users will immediately benefit from the app's two-way communication functionality  
46 as they will receive medication-safety alerts from NPC in addition to their submission to NPC  
47 of ADR-reports.  
48

49 We plan to present the project's research findings at local stakeholders' workshops organized  
50 to ensure the balanced representation of HCPs, administrators, policy makers, patient safety  
51 groups, the public and other local and international partners. At least one policy brief will be  
52 prepared from this work. We shall also disseminate the results at three or more local and  
53 international conferences, engage the public through local and international television  
54 channels, and through social media (Facebook, Twitter, WhatsApp, blogging etc.). We shall  
55 publish at least two manuscripts in internationally-recognized peer-reviewed journals.  
56  
57  
58  
59  
60

### **Ethical and environmental considerations**

The study received ethical approval from the School of Health Sciences Research and Ethics Committee at Makerere University College of Health Sciences (MAKSHSREC-2020-64); and was registered with the Uganda National Council for Science and Technology (HS1206ES). Administrative clearance will be obtained from participating ART-sites and written/thumb-printed informed consent from participating PLHIV and expert clients/CHWs. We consider the introduction of USSD and Med Safety for ADR-reporting to be a minimal risk intervention. However, we shall remind participants to mind their own confidentiality which could be lost due to phone sharing. On the contrary, participants in the intervention group could potentially benefit from peer-support. We received a waiver of consent from the ethics committee to access anonymized clinical and medication data of PLHIV at the health facilities. The data will be extracted by staff of the respective health facilities. Applicable international laws on data protection will be observed as well as the Data Protection and Privacy Act, 2019 of the Republic of Uganda[50].

### **Risk management**

*Small number of patients ( $\leq 10\%$ ) expected to own functional smartphones:* Our main goal is to demonstrate that Med Safety can be downloaded and used by PLHIV, which we can achieve without the requirement for strict sample size and power calculations. Also, we shall use the USSD which can work on both basic low-tech mobile phones and high-tech smartphones.

*Duplicate ADR-reports:* Duplicates will be identified by the NPC staff and study statistician.

*Loss to follow-up of peer supporters and PLHIV:* A major goal is to demonstrate the feasibility of peer support for PLHIV to get involved in ADR-reporting. The study will provide preliminary data on the magnitude of loss to follow-up to be expected in future studies.

*Compromise in data quality by the research assistants:* The research assistants will be trained by the study team. Questionnaire data will be transmitted online immediately using ODK – thus giving a chance to the centrally located statistician to verify data integrity.

*COVID-19:* We shall observe the SOPs of social distancing, washing hands and wearing masks by study participants and investigators to minimise the risk of spreading COVID-19. The pandemic could limit face-to-face contact but is also an opportunity to show how more remote engagement can support pharmacovigilance in a developing country setting. Remote engagement could be more cost-effective to support participants through phone calls and other forms of online interaction.

### **Collaboration**

MHRA adapted Med Safety for Uganda with NDA's approval. The NPC staff at NDA, where NPC is located, will participate in this project. Involvement of the ACP in this pharmacovigilance project will promote the integration of peer support-driven pharmacovigilance in the HIV care and treatment programme of Uganda. The Department of Pharmacology & Therapeutics and Department of Pharmacy, Makerere University conceived this project and will coordinate the study. The WHO contracted MHRA to adapt the app for Uganda and will, together with UMC, provide technical support.

**Acknowledgements:** Uganda's National Drug Authority provided technical and logistical support during the planning phase of this project.

1  
2  
3 **Contributors:** RK, HZ, FK, SMN, JNS designed the study. RK drafted the manuscript. RK,  
4 HBN, VN, CK, HZ, SMN, JNS, PT, KH, CSM, MR, FK critically reviewed and revised the final  
5 version of the manuscript. All authors read and approved the final manuscript.  
6

7 **Funding:** This project was supported by the Special Program for Research and Training in  
8 Tropical Diseases (TDR), a co-sponsored program of the United Nations Children's Fund, the  
9 United Nations Development program, the World Bank, and the World Health Organization  
10 (No grant number). TDR funding was provided by governmental and co-sponsor core  
11 contributions to TDR.  
12

13 **Disclaimer:** CS Merle and ME Raguenaud are staff members of the WHO; the authors alone  
14 are responsible for the views expressed in this publication and they do not necessarily  
15 represent the decisions, policies or views of WHO.  
16

17 **Competing interests:** None declared.  
18

19 **Patient consent for publication:** Not required.  
20

21 **Provenance and peer review:** Not commissioned; externally peer reviewed.  
22

23 **Open access:** This is an open access article distributed in accordance with the Creative  
24 Commons Attribution Non-Commercial (CC BY-NC 4.0) license, which permits others to  
25 distribute, remix, adapt, build upon this work non-commercially,  
26 and license their derivative works on different terms, provided the original work is properly  
27 cited, appropriate credit is given, any changes made indicated, and the use is non-commercial.  
28 See: <http://creativecommons.org/licenses/by-nc/4.0/>.  
29  
30  
31  
32  
33  
34  
35  
36  
37  
38  
39  
40  
41  
42  
43  
44  
45  
46  
47  
48  
49  
50  
51  
52  
53  
54  
55  
56  
57  
58  
59  
60

## References

1. Johnson, J.A. and J.L. Bootman, *Drug-related morbidity and mortality and the economic impact of pharmaceutical care*. Am J Health Syst Pharm, 1997. **54**(5): p. 554-8.
2. Kiguba, R., C. Karamagi, and S.M. Bird, *Incidence, risk factors and risk prediction of hospital-acquired suspected adverse drug reactions: a prospective cohort of Ugandan inpatients*. BMJ Open, 2017. **7**(1): p. e010568.
3. Tumwikirize, W.A., et al., *Adverse drug reactions in patients admitted on internal medicine wards in a district and regional hospital in Uganda*. Afr Health Sci, 2011. **11**(1): p. 72-8.
4. Coleman, J.J. and S.K. Pontefract, *Adverse drug reactions*. Clin Med (Lond), 2016. **16**(5): p. 481-485.
5. Onakpoya, I.J., C.J. Heneghan, and J.K. Aronson, *Post-marketing withdrawal of 462 medicinal products because of adverse drug reactions: a systematic review of the world literature*. BMC Med, 2016. **14**: p. 10.
6. Bates, D.W., et al., *Incidence of adverse drug events and potential adverse drug events. Implications for prevention. ADE Prevention Study Group*. JAMA, 1995. **274**(1): p. 29-34.
7. Hazell, L. and S.A. Shakir, *Under-reporting of adverse drug reactions : a systematic review*. Drug Saf, 2006. **29**(5): p. 385-96.
8. Kiguba, R., et al., *Recognition and reporting of suspected adverse drug reactions by surveyed healthcare professionals in Uganda: key determinants*. BMJ Open, 2014. **4**(11): p. e005869.
9. Lopez-Gonzalez, E., M.T. Herdeiro, and A. Figueiras, *Determinants of under-reporting of adverse drug reactions: a systematic review*. Drug Saf, 2009. **32**(1): p. 19-31.
10. Defer, G., et al., *Adverse Drug Reaction Reporting Using a Mobile Device Application by Persons with Multiple Sclerosis: A Cluster Randomized Controlled Trial*. Drug Saf, 2021. **44**(2): p. 223-233.
11. Margraff, F. and D. Bertram, *Adverse drug reaction reporting by patients: an overview of fifty countries*. Drug Saf, 2014. **37**(6): p. 409-19.
12. Inácio, P., A. Cavaco, and M. Airaksinen, *The value of patient reporting to the pharmacovigilance system: a systematic review*. 2017. **83**(2): p. 227-246.
13. Avery, A.J., et al., *Evaluation of patient reporting of adverse drug reactions to the UK 'Yellow Card Scheme': literature review, descriptive and qualitative analyses, and questionnaire surveys*. Health Technol Assess, 2011. **15**(20): p. 1-234, iii-iv.
14. Ramlakhan, J.U., et al., *What constitutes patient-centred care for women: a theoretical rapid review*. Int J Equity Health, 2019. **18**(1): p. 182.
15. Ministry of Health Uganda. *Consolidated Guidelines for Prevention and Treatment of HIV in Uganda*. 2018 [cited 2019 19 September]; Available from: <http://library.health.go.ug/publications/hivaids/consolidated-guidelines-prevention-and-treatment-hiv-uganda>.
16. Ministry of Health Uganda, *Consolidated guidelines for the prevention and treatment of HIV and AIDS in Uganda Kampala, Uganda*. 2020, Ministry of Health Uganda.
17. Johnson, S., et al., *Peer-supported self-management for people discharged from a mental health crisis team: a randomised controlled trial*. Lancet, 2018. **392**(10145): p. 409-418.
18. Kong, L.N., et al., *The effectiveness of peer support on self-efficacy and quality of life in adults with type 2 diabetes: A systematic review and meta-analysis*. J Adv Nurs, 2019. **75**(4): p. 711-722.
19. Ammon, N., S. Mason, and J.M. Corkery, *Factors impacting antiretroviral therapy adherence among human immunodeficiency virus-positive adolescents in Sub-Saharan Africa: a systematic review*. Public Health, 2018. **157**: p. 20-31.
20. Snyder, K., et al., *Preliminary results from Hlanganani (Coming Together): A structured support group for HIV-infected adolescents piloted in Cape Town, South Africa*. Children and Youth Services Review, 2014. **45**: p. 114-121.
21. Genberg, B.L., et al., *Improving Engagement in the HIV Care Cascade: A Systematic Review of Interventions Involving People Living with HIV/AIDS as Peers*. AIDS Behav, 2016. **20**(10): p. 2452-2463.

- 1
  - 2
  - 3
  - 4
  - 5
  - 6
  - 7
  - 8
  - 9
  - 10
  - 11
  - 12
  - 13
  - 14
  - 15
  - 16
  - 17
  - 18
  - 19
  - 20
  - 21
  - 22
  - 23
  - 24
  - 25
  - 26
  - 27
  - 28
  - 29
  - 30
  - 31
  - 32
  - 33
  - 34
  - 35
  - 36
  - 37
  - 38
  - 39
  - 40
  - 41
  - 42
  - 43
  - 44
  - 45
  - 46
  - 47
  - 48
  - 49
  - 50
  - 51
  - 52
  - 53
  - 54
  - 55
  - 56
  - 57
  - 58
  - 59
  - 60
22. Davidson, L., et al., *Peer support among adults with serious mental illness: a report from the field*. Schizophr Bull, 2006. **32**(3): p. 443-50.
23. Lawn, S., A. Smith, and K. Hunter, *Mental health peer support for hospital avoidance and early discharge: An Australian example of consumer driven and operated service*. Journal of Mental Health, 2008. **17**(5): p. 498-508.
24. Ratzlaff, S., et al., *The Kansas Consumer as Provider program: measuring the effects of a supported education initiative*. Psychiatr Rehabil J, 2006. **29**(3): p. 174-82.
25. Repper J, et al. *Peer support workers: theory and practice*. 2013 [cited 2021 28 May]; Available from: <https://www.centreformentalhealth.org.uk/publications/peer-support-workers-theory-and-practice>.
26. GSMA. *Low Tech, High Impact: USSD in the time of COVID-19*. 2020; Available from: <https://www.gsma.com/mobilefordevelopment/uncategorized/low-tech-high-impact-ussd-in-the-time-of-covid-19/>.
27. WEB-RADR. *Med Safety App*. Available from: <https://web-radr.eu/mobile-apps/med-safety/>.
28. smsone. [cited 2021 26 July]; Available from: <https://smsone.co.ug/>.
29. Ayo C. K., et al., *A prototype mobile money implementation in Nigeria*. African Journal of Business Management, 2012. **6**(6): p. 2195-2201.
30. kolastudios. [cited 2021 26 July]; Available from: <https://kolastudios.com/#contact>.
31. Ghosh, R. and D. Lewis, *Aims and approaches of Web-RADR: a consortium ensuring reliable ADR reporting via mobile devices and new insights from social media*. Expert Opin Drug Saf, 2015. **14**(12): p. 1845-53.
32. Proctor, E., et al., *Outcomes for implementation research: conceptual distinctions, measurement challenges, and research agenda*. Adm Policy Ment Health, 2011. **38**(2): p. 65-76.
33. Kiguba, R., et al., *Adverse Drug Reaction Onsets in Uganda's VigiBase((R)): Delayed International Visibility, Data Quality and Illustrative Signal Detection Analyses*. Pharmaceut Med, 2018. **32**(6): p. 413-427.
34. CQUIN. *Differentiated Service Delivery in Uganda*. 2020; Available from: <https://cquin.icap.columbia.edu/the-work/uganda/>.
35. Ministry of Health Uganda. *The 2019 HIV Epidemiological Surveillance Report for Uganda*. 2020; Available from: <https://www.health.go.ug/cause/the-2019-hiv-epidemiological-surveillance-report-for-uganda/>.
36. PEPFAR. *PEPFAR Uganda Country Operational Plan (COP) 2019 Strategic Direction Summary April 12, 2019*. Available from: [https://www.state.gov/wp-content/uploads/2019/09/Uganda\\_COP19-Strategic-Directional-Summary\\_public.pdf](https://www.state.gov/wp-content/uploads/2019/09/Uganda_COP19-Strategic-Directional-Summary_public.pdf).
37. Levesque, J.-F., M.F. Harris, and G. Russell, *Patient-centred access to health care: conceptualising access at the interface of health systems and populations*. International Journal for Equity in Health, 2013. **12**(1): p. 18.
38. Peers for Progress and National Council of La Raza. *Global Evidence for Peer Support; Humanizing healthcare*. Report from an International Conference [cited 2021 28 May]; Available from: <http://peersforprogress.org/>.
39. Uganda National Council for Science and Technology. *National Guidelines for Research involving Humans as Research Participants*. 2014 [cited 2021 27 July]; Available from: [https://engage.avac.org/wp-content/uploads/grassblade/12230-testing-tincan/story\\_content/external\\_files/Uganda%202014%20National%20guidelines%20for%20research%20involving%20humans%20as%20research%20participants.pdf](https://engage.avac.org/wp-content/uploads/grassblade/12230-testing-tincan/story_content/external_files/Uganda%202014%20National%20guidelines%20for%20research%20involving%20humans%20as%20research%20participants.pdf).
40. Batista, C.J.B., et al., *The Brazilian experience of implementing the active pharmacovigilance of dolutegravir*. Medicine (Baltimore), 2019. **98**(10): p. e14828.
41. The Collaboration on International ICT Policy for East and Southern Africa. *National Information Technology Survey*. 2017 [cited 2021 28 May]; Available from: <https://www.nita.go.ug/sites/default/files/publications/National%20IT%20Survey%20April%2010th.pdf>.



- 1
- 2
- 3
- 4 42. Pierce, C.E., et al., *Recommendations on the Use of Mobile Applications for the Collection and*
- 5 *Communication of Pharmaceutical Product Safety Information: Lessons from IMI WEB-*
- 6 *RADR*. Drug Saf, 2019. **42**(4): p. 477-489.
- 7 43. Damschroder, L.J., et al., *Fostering implementation of health services research findings into*
- 8 *practice: a consolidated framework for advancing implementation science*. Implementation
- 9 Science, 2009. **4**(1): p. 50.
- 10 44. Safaeinili, N., et al., *CFIR simplified: Pragmatic application of and adaptations to the*
- 11 *Consolidated Framework for Implementation Research (CFIR) for evaluation of a patient-*
- 12 *centered care transformation within a learning health system*. Learning Health Systems,
- 13 2020. **4**(1): p. e10201.
- 14 45. Means, A.R., et al., *Evaluating and optimizing the consolidated framework for*
- 15 *implementation research (CFIR) for use in low- and middle-income countries: a systematic*
- 16 *review*. Implementation Science, 2020. **15**(1): p. 17.
- 17 46. Miles, M.B. and A.M. Huberman, *Qualitative data analysis: An expanded sourcebook, 2nd ed.*
- 18 *Qualitative data analysis: An expanded sourcebook, 2nd ed.* 1994, Thousand Oaks, CA, US:
- 19 Sage Publications, Inc. xiv, 338-xiv, 338.
- 20 47. Fereday, J. and E. Muir-Cochrane, *Demonstrating Rigor Using Thematic Analysis: A Hybrid*
- 21 *Approach of Inductive and Deductive Coding and Theme Development*. International
- 22 Journal of Qualitative Methods, 2006. **5**(1): p. 80-92.
- 23 48. Ministry of Health Uganda, *Young people and Adolescent Peer Support Model for improving*
- 24 *HIV care and treatment outcomes for Adolescents and young PLHIV of 2019 in Uganda*.
- 25 2019.
- 26 49. Ministry of Health Uganda. *Technical Inter-sectoral Committee on COVID-19; National*
- 27 *Community Engagement Strategy for COVID-19 Response for Uganda*. 2020 [cited 2021 28
- 28 May]; Available from: [https://www.redcrossug.org/about/more-info/covid-19-](https://www.redcrossug.org/about/more-info/covid-19-community-engagement-strategy)
- 29 [community-engagement-strategy](https://www.redcrossug.org/about/more-info/covid-19-community-engagement-strategy).
- 30 50. Government of Uganda. *Data Protection and Privacy Act, 2019 of the Republic of Uganda*.
- 31 2019 [cited 2021 28 May]; Available from: <https://ict.go.ug> › wp-content › uploads ›
- 32 2019/03.
- 33
- 34
- 35
- 36
- 37
- 38
- 39
- 40
- 41
- 42
- 43
- 44
- 45
- 46
- 47
- 48
- 49
- 50
- 51
- 52
- 53
- 54
- 55
- 56
- 57
- 58
- 59
- 60

## Figures

**Figure 1.** Before-after and there-there quasi-experimental study design for a peer support intervention to improve adverse drug reaction reporting by people living with HIV in Uganda

**Figure 2:** Layers of supervision in the peer support mechanism

**Figure 3.** Four key functions of the humanizing healthcare model for peer support as adapted from the framework by Peers for Progress

**Figure 4.** Intervention and comparison groups with two-way comparisons (before-after for each group (A&C, B&D), and between groups after intervention (C&D).

**Figure 5.** The five Differentiated Service Delivery models of HIV and TB care in Uganda, 2017.

For peer review only



43  
44  
45  
46  
47  
48  
49  
50  
51  
52  
53  
54  
55  
56  
57  
58  
59  
60

**Figure 1.** Before-after and there-there quasi-experimental study design for a peer support intervention to improve adverse drug reaction reporting by people living with HIV in Uganda



**Figure 2.** Layers of supervision in the peer support mechanism



23 *Source: Peers for Progress, Global Evidence for Peer Support; Humanizing Healthcare (September 2014)*

24 **Figure 3.** Four key functions of the humanizing healthcare model for peer support as adapted from  
25 the framework by Peers for Progress  
26  
27  
28  
29  
30  
31  
32  
33  
34  
35  
36  
37  
38  
39  
40  
41  
42  
43  
44  
45  
46  
47  
48  
49  
50  
51  
52  
53  
54  
55  
56  
57  
58  
59  
60



**Figure 4.** Intervention and comparison groups with two-way comparisons (before-after for each group (A&C, B&D), and between groups after intervention (C&D)).

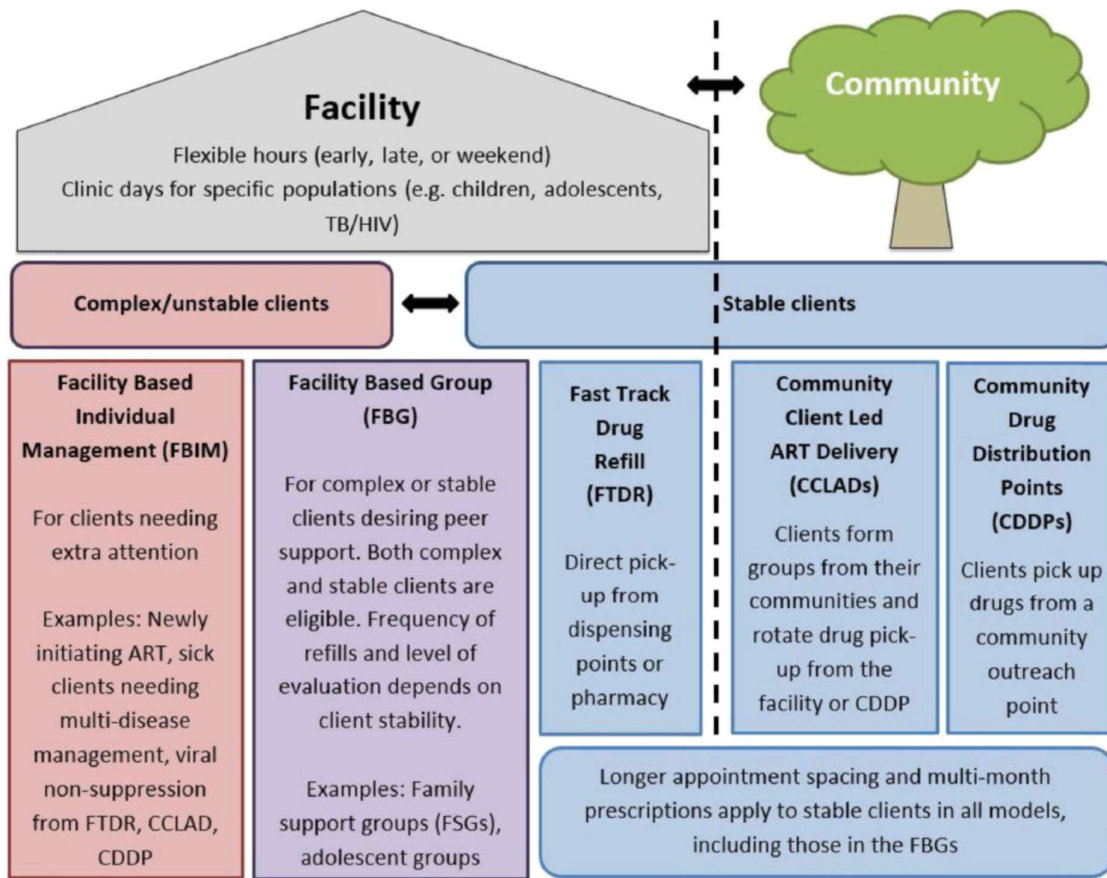

Source: Ministry of Health, *Implementation Guide for Differentiated TB Services in Uganda* (June 2017).

**Figure 5.** The five Differentiated Service Delivery models of HIV and TB care in Uganda, 2017.

# BMJ Open

## Implementation of a peer support intervention to promote the detection, reporting and management of adverse drug reactions in people living with HIV in Uganda: a protocol for a quasi-experimental study

|                                 |                                                                                                                                                                                                                                                                                                                                                                                                                                                                                                                                                                                                                                                                                                                                                                                                                                                                                                                                                                                                                                       |
|---------------------------------|---------------------------------------------------------------------------------------------------------------------------------------------------------------------------------------------------------------------------------------------------------------------------------------------------------------------------------------------------------------------------------------------------------------------------------------------------------------------------------------------------------------------------------------------------------------------------------------------------------------------------------------------------------------------------------------------------------------------------------------------------------------------------------------------------------------------------------------------------------------------------------------------------------------------------------------------------------------------------------------------------------------------------------------|
| Journal:                        | <i>BMJ Open</i>                                                                                                                                                                                                                                                                                                                                                                                                                                                                                                                                                                                                                                                                                                                                                                                                                                                                                                                                                                                                                       |
| Manuscript ID                   | bmjopen-2021-056039.R3                                                                                                                                                                                                                                                                                                                                                                                                                                                                                                                                                                                                                                                                                                                                                                                                                                                                                                                                                                                                                |
| Article Type:                   | Protocol                                                                                                                                                                                                                                                                                                                                                                                                                                                                                                                                                                                                                                                                                                                                                                                                                                                                                                                                                                                                                              |
| Date Submitted by the Author:   | 12-Apr-2022                                                                                                                                                                                                                                                                                                                                                                                                                                                                                                                                                                                                                                                                                                                                                                                                                                                                                                                                                                                                                           |
| Complete List of Authors:       | Kiguba, Ronald; Makerere University College of Health Sciences, Pharmacology and Therapeutics<br>Ndagije, Helen ; National Drug Authority, Directorate of Product Safety<br>Nambasa, Victoria; National Drug Authority, Directorate of Product Safety<br>Katureebe, Cordelia; Ministry of Health, AIDS Control Programme<br>Zakumumpa, Henry; Makerere University College of Health Sciences<br>Nanyonga, Stella; Makerere University College of Health Sciences<br>Ssanyu, Jacquelyn ; Makerere University College of Health Sciences, Department of Pharmacy<br>Tregunno, Phil; Medicines and Healthcare Products Regulatory Agency<br>Harrison, Kendal; Medicines and Healthcare Products Regulatory Agency<br>Merle, Corinne; World Health Organization, Special Programme for Research & Training In Tropical Diseases (TDR)<br>Raguenaud, Marie-eve; World Health Organization, Special Programme for Research & Training In Tropical Diseases (TDR)<br>Kitutu, Freddy; Makerere University School of Health Sciences, Pharmacy |
| <b>Primary Subject Heading</b>: | Pharmacology and therapeutics                                                                                                                                                                                                                                                                                                                                                                                                                                                                                                                                                                                                                                                                                                                                                                                                                                                                                                                                                                                                         |
| Secondary Subject Heading:      | Epidemiology, HIV/AIDS, Patient-centred medicine, Qualitative research                                                                                                                                                                                                                                                                                                                                                                                                                                                                                                                                                                                                                                                                                                                                                                                                                                                                                                                                                                |
| Keywords:                       | Adverse events < THERAPEUTICS, SOCIAL MEDICINE, Epidemiology < INFECTIOUS DISEASES, Pharmacology < TROPICAL MEDICINE                                                                                                                                                                                                                                                                                                                                                                                                                                                                                                                                                                                                                                                                                                                                                                                                                                                                                                                  |
|                                 |                                                                                                                                                                                                                                                                                                                                                                                                                                                                                                                                                                                                                                                                                                                                                                                                                                                                                                                                                                                                                                       |

SCHOLARONE™  
Manuscripts



1  
2  
3 **Implementation of a peer support intervention to promote the detection,**  
4 **reporting and management of adverse drug reactions in people living with HIV**  
5 **in Uganda: a protocol for a quasi-experimental study**  
6  
7  
8

9 **Authors:**

10 *Ronald Kiguba<sup>1\*</sup>, Helen B. Ndagije<sup>2</sup>, Victoria Nambasa<sup>2</sup>, Cordelia Katureebe<sup>3</sup>, Henry*  
11 *Zakumumpa<sup>4</sup>, Stella Nanyonga<sup>5</sup>, Jacquellyn Nambi Ssanyu<sup>6</sup>, Phil Tregunno<sup>7</sup>, Kendal*  
12 *Harrison<sup>7</sup>, Corinne S Merle<sup>8</sup>, Marie-eve Raguenaud<sup>8</sup>, Freddy Eric Kitutu<sup>6</sup>*  
13  
14

15 \*Correspondence to: Ronald Kiguba (Tel: +256 701 840683; Email: [kiguba@gmail.com](mailto:kiguba@gmail.com))  
16

17 **Affiliations:**

18  
19 <sup>1</sup>Department of Pharmacology and Therapeutics, Makerere University College of Health  
20 Sciences, Kampala, Uganda  
21

22 <sup>2</sup>National Pharmacovigilance Centre, National Drug Authority, Kampala, Uganda  
23

24 <sup>3</sup>AIDS Control Programme, Ministry of Health, Kampala, Uganda  
25

26 <sup>4</sup>School of Public Health, Makerere University College of Health Sciences, Kampala, Uganda  
27

28 <sup>5</sup>Clinical Epidemiology Unit, Makerere University College of Health Sciences, Kampala,  
29 Uganda  
30

31 <sup>6</sup>Sustainable Pharmaceutical Systems (SPS) unit, Department of Pharmacy, School of  
32 Health Sciences, Makerere University College of Health Sciences, Kampala, Uganda  
33

34 <sup>7</sup>Medicines and Healthcare products Regulatory Agency, London, United Kingdom  
35

36 <sup>8</sup>The Special Programme for Research & Training in Tropical Diseases (TDR), World Health  
37 Organization, Geneva, Switzerland  
38  
39  
40  
41  
42  
43  
44  
45  
46  
47  
48  
49  
50  
51  
52  
53  
54  
55  
56  
57  
58  
59  
60

## Abstract

**Introduction:** Patients have contributed <1% of spontaneous adverse drug reaction (ADR) reports in Uganda's pharmacovigilance database. Peer support combined with mobile technologies could empower people living with HIV (PLHIV) to report ADRs and improve ADR management through linkage to care. We seek to test the feasibility and effect of a peer support intervention on ADR-reporting by PLHIV receiving combination antiretroviral therapy (cART) in Uganda; identify barriers and facilitators to the intervention; and characterise ADR-reporting and management.

**Methods and analysis:** This is a quasi-experimental study to be implemented over 4-months at 12 intervention and 12 comparison cART-sites from four geographical regions of Uganda. Per region, two blocks each with a tertiary, secondary and primary care cART-site will be selected by simple random sampling. Blocks per region will be randomly assigned to intervention and comparison arms.

Study units will include cART-sites and PLHIV receiving cART. PLHIV at intervention sites will be assigned to peer supporters to empower them to report ADRs directly to the National Pharmacovigilance Centre (NPC). Peer supporters will be expert clients from among PLHIV and/or recognized community health workers.

Direct patient-reporting of ADRs to NPC will leverage the Med Safety App and toll-free Unstructured Supplementary Service Data interface to augment traditional pharmacovigilance methods.

The primary outcomes are attrition rate measured by number of study participants who remain in the study until the end of follow-up at 4 months; and number of ADR reports submitted to NPC by PLHIV as measured by questionnaire and data abstraction from the national pharmacovigilance database at baseline and 4 months.

**Ethics and dissemination:** The study received ethical approval from: School of Health Sciences Research and Ethics Committee at Makerere University (MAKSHSREC-2020-64) and Uganda National Council for Science and Technology (HS1206ES). Results will be shared with PLHIV, policy-makers, the public and academia.

**Trial registration:** ISRCTN75989485

### Strengths and limitations of the study

The study will blend a novel peer support intervention with mobile data transmission technologies to promote the detection and reporting of suspected adverse drug reactions (ADRs) by people living with HIV

People living with HIV who experience serious ADRs will be linked directly to health facilities for ADR management

An implementation research approach will be employed to identify the factors that could influence the uptake of peer support in patient-reporting of ADRs while documenting predefined outputs and outcomes relevant to the research objectives

The study will generate pilot data on effect sizes to aid the planning of future randomized controlled trials using peer support to promote patient-reporting of ADRs

## Introduction

Adverse drug reactions (ADRs) are a leading cause of morbidity, mortality and increased healthcare costs[1-3]. The timely detection and reporting of ADRs promotes their appropriate management, more accurate prediction and prevention[4]. Pharmacovigilance systems worldwide have identified and led to withdrawal from the market of at least 462 harmful medicines, primarily through passive spontaneous ADR-reporting by healthcare professionals (HCPs)[5], thereby contributing to patient safety. The major drawback of the spontaneous pharmacovigilance system is its reliance on individual HCP motivation. It is estimated that only about 10% of ADRs are reported through the spontaneous pharmacovigilance system, which is a very low rate of ADR-reporting[6-8]. Several factors hinder ADR-reporting by HCPs including medical specialty, lower-level healthcare facility, older HCP age, heavy workloads, shortage of reporting tools, ignorance and fear of litigation[8, 9].

Patient-reporting of suspected ADRs is given little attention in developing countries. Yet, patients are a known complementary source of pharmacovigilance data[10-12]. Patients can make detailed ADR-reports and with similar quality as ADR-reports from HCPs. Patients can also report previously unknown ADRs[13]. Thus, patients are well-placed to participate in ADR-reporting because they have first-hand experience of their own state of health and treatment. Patient involvement in ADR-reporting aligns with the increasing global momentum towards patient-centred healthcare[14]. Yet, patient participation in pharmacovigilance is under-explored with little empirical data, especially in low- and middle-income countries (LMICs). In Uganda, patients' contribution to ADR-reporting is very low indeed and is estimated at less than 1% of the reports in the national pharmacovigilance database (Victoria Nambasa, Pharmacovigilance Manager at National Drug Authority (NDA); personal communication; 6 April 2020).

The quest for expanded avenues to increase the reporting of suspected ADRs has never been more apparent than in Uganda where dolutegravir (DTG) and Isoniazid Preventive Therapy (IPT) have been massively rolled-out since 2018 and 2019, respectively. Anecdotal evidence in Uganda suggests that increased use of DTG and IPT has increased the burden of associated serious ADRs e.g. hyperglycaemia, hepatotoxicity and neuropsychiatric effects[15, 16]; necessitating a more robust pharmacovigilance system that leverages patient-reporting of suspected ADRs to DTG-regimens and/or IPT. This study proposes to test the feasibility and effect of a peer support intervention combined with mobile phone-based tools to promote the reporting of ADRs by people living with HIV (PLHIV) on DTG-based ART and/or IPT in Uganda. If successful, this study will contribute to the development of a more robust pharmacovigilance system to better document serious ADRs in Uganda.

Patient-centred peer support has shown promise in the management of chronic illnesses such as diabetes and mental health[17, 18]; and in improving retention in HIV care and adherence to ART[19, 20]. Thus, peer support could substantially promote the detection, reporting and management of ADRs amongst PLHIV. In the current study, peer support is based on the premise that PLHIV who have previously experienced ADRs linked to ART can – as peer supporters - encourage, mentor and support other similarly affected but less experienced PLHIV to detect and report ADRs[21]. Peer supporters could serve as positive role models to improve the self-efficacy of other PLHIV whom they could guide to identify and report ADRs using the available tools. Direct patient-reporting of ADRs could utilize the Med Safety mobile application, a toll-free Unstructured Supplementary Service Data (USSD) interface and the

1  
2  
3 traditional pharmacovigilance methods of paper-form, online forms and voice call. The aim  
4 remains to have all suspected ADR reports submitted to the National Pharmacovigilance  
5 Centre (NPC) database for analysis and subsequent processing. However, those that require  
6 clinical management should be brought to the attention of the HCP for appropriate  
7 management and prevention[21-23]. From guiding less experienced PLHIV, expert clients  
8 serving as peer supporters could equally be empowered to build their own self-esteem[24,  
9 25].  
10  
11

12 Our peer support intervention for strengthening the Ugandan pharmacovigilance system  
13 through patient-reporting of ADRs is intended to leverage the available mobile technologies  
14 e.g. the USSD platform available for both low-tech non-smartphones and high-tech  
15 smartphones[26]; and the Med Safety mobile application for high-tech smartphones[27].  
16 USSD is a real-time text-driven technology which allows users to interact directly from their  
17 mobile phones by making a selection from a menu. It allows for faster two-way communication  
18 of information and enables rapid exchange of data - up to seven times faster than SMS[28].  
19 The USSD interface has been a key success factor in the extensive penetration of mobile  
20 money banking in rural unbanked sub-Saharan Africa[29]. No Internet connection is needed.  
21 This project's toll-free USSD code has been developed by a private Ugandan software  
22 company[30]. Med Safety is a smartphone mobile application for ADR-reporting that was  
23 recently adapted for LMICs from the prototype app funded by the European Union's Innovative  
24 Medicines Initiative – the WEB-RADR project. Adaptation of the mobile app is led by UK's  
25 Medicines and Healthcare products Regulatory Agency in collaboration with World Health  
26 Organization (WHO) and the WHO Collaborating Centre for International Drug Monitoring, the  
27 Uppsala Monitoring Centre (UMC)[31]. Med Safety was launched in Uganda in February 2020.  
28 Using both USSD and Med Safety alongside existing pharmacovigilance methods could  
29 strengthen peer support-enhanced patient-driven pharmacovigilance in Uganda.  
30  
31  
32  
33  
34

35 Lastly, the study will use an implementation science approach to evaluate the peer support  
36 intervention among PLHIV. Implementation research is critical in identifying factors that could  
37 influence uptake of the intervention while documenting predefined outputs and outcomes  
38 relevant to the research objectives[32]. Our ultimate goal is to increase patient reporting of  
39 ADRs in LMICs such as Uganda with weak pharmacovigilance systems. Hence, this study  
40 aims to develop and assess the feasibility of a peer support intervention combined with mobile  
41 phone-based tools to promote the detection and reporting of ADRs in PLHIV on DTG-based  
42 ART and/or IPT in Uganda. It will identify the barriers and facilitators to implementing the  
43 intervention, characterise ADR-reporting and management and estimate the effect of the  
44 intervention on ADR-reporting among PLHIV.  
45  
46  
47

## 48 **Research hypotheses and objectives**

### 49 Research hypotheses:

50 We hypothesize that the patient-centred peer support intervention combined with existing  
51 mobile data transmission technologies for promoting the detection, reporting and management  
52 of ADRs in PLHIV is feasible and acceptable. We also hypothesize that this peer support  
53 intervention combined with mobile data transmission technologies will significantly increase  
54 the number of ADR reports submitted to NPC by PLHIV who receive the intervention during  
55 4-months of follow-up when compared with PLHIV who do not receive the intervention.  
56  
57  
58  
59  
60

1  
2  
3 Specific objectives:

- 4 1. To develop a peer support intervention combined with mobile data transmission  
5 technologies to promote the detection, reporting and management of ADRs in PLHIV  
6 receiving DTG and/or IPT in Uganda  
7  
8 2. To explore the barriers and facilitators to implementation of the peer support  
9 intervention combined with mobile data transmission technologies to promote ADR  
10 detection, reporting and management among PLHIV on DTG and/or IPT in Uganda  
11  
12 3. To describe the patterns of ADR-reporting (number, rate, quality, time to reporting,  
13 seriousness etc.) by PLHIV receiving DTG and/or IPT in whom the peer support  
14 intervention combined with mobile data transmission technologies is implemented in  
15 Uganda  
16  
17 4. To estimate the effect of the peer support intervention combined with mobile data  
18 transmission technologies on the rate of ADR-reporting by PLHIV receiving DTG  
19 and/or IPT in Uganda  
20  
21  
22  
23  
24  
25  
26  
27  
28  
29  
30  
31  
32  
33  
34  
35  
36  
37  
38  
39  
40  
41  
42  
43  
44  
45  
46  
47  
48  
49  
50  
51  
52  
53  
54  
55  
56  
57  
58  
59  
60

## Methods

### Study setting

Uganda has a tiered healthcare system with different levels of healthcare from the National Referral Hospitals which provide tertiary and super-specialized healthcare, through Regional Referral Hospitals (RRHs), General Hospitals, level IV Health Centers (HC IV), level III Health Centers (HC III), to level II Health Centers (HC II) that progressively offer less scope and breadth of health services to out-patient services[33]. HIV treatment and care is provided from HC III and upwards giving a total of 1,832 accredited centers that provide ART services in Uganda. Uganda adopted the Differentiated Service Delivery Models (DSDM), where stable clients have less frequent clinical assessment visits. In 2019, about 80% (1,466/1,832) of the ART accredited sites and 78% (975,675/1,241,478) of PLHIV on ART had access to the DSDM model. An additional, 12% (114,363/975,675) of clients enrolled on DSDM received ART services from the community through Community Drug Distribution Points (CDDP) and Community Client-Led ART Distribution (CCLAD)[34].

Uganda has an estimated 1.46 million PLHIV, of whom prevalence among people aged 15 to 49 years is 5.8% with women having a higher prevalence (7.1%) than men (4.3%). Among the PLHIV, 93% are aged  $\geq 15$  years and 60% of the HIV-infected adults are women. In 2019, there were 53,413 new HIV infections of which 40,000 were among adults and 21,000 Ugandans died of AIDS-related illnesses[35]. Following the "Test and Treat" policy for HIV adopted in 2016 and scaled up in 2017, the ART coverage was at 89% in 2019. Approximately 96% of PLHIV on ART are taking first-line regimens and >443,000 PLHIV are on TLD. About 17% of PLHIV are ART-naïve at treatment initiation. In 2019, about 41% of TB patients were HIV-positive and 97% of HIV-positive TB patients were receiving ART[35, 36]. By the end of 2019, 477,190 of PLHIV were enrolled on IPT. Strategies to strengthen pharmacovigilance were instituted as part of DTG/IPT roll-out in the 2020 revised Consolidated Guidelines for Prevention and Treatment of HIV and AIDS in Uganda[16]. The guidelines support ADR identification, monitoring and reporting, particularly for DTG and IPT. Pharmacovigilance sentinel sites were established at 18 sentinel sites (RRHs and Centers of Excellence). These ART-sites received training and ADR-reporting tools. ADRs are reported to the NPC at NDA through a paper-based system, online system, toll-free phone line or through NDA's Med Safety App.

For the current study, the authors have divided the country into four geographical regions to establish a sampling framework that leads to selection of national level representation of health facilities and factors that influence provision of care to PLHIV and their pharmacovigilance-related needs. In each region, two blocks of health facilities with ART-sites will be selected of which one block will implement the intervention and the other will serve as the comparison block of health facilities. Each block will consist of an ART-site at a RRH (tertiary care), a HC IV (secondary care) and HC III (primary care), respectively. Therefore, 12 intervention ART-sites will be matched by level of care and region with 12 comparison ART-sites from the four regions of Uganda.

### Study design

The study will employ a quasi-experimental design with pre-post and there-there comparisons to measure the preliminary impact of the peer support intervention on ADR-reporting by PLHIV, **Figure 1**. The study will use both quantitative and qualitative methods to triangulate the research findings. The qualitative research methods aim to understand the barriers and

1  
2  
3 facilitators to implementing the peer support intervention for promoting ADR detection,  
4 reporting and management from the perspective of PLHIV and in the context of their interface  
5 with Uganda's healthcare system[37] and thus they will be predominantly implemented in the  
6 intervention arm. We will explore the experiences of PLHIV in the utilization of the peer support  
7 intervention and elicit their preferences to further refine the intervention and implementation  
8 strategy.  
9

### 10 11 The intervention

12 The peer support intervention leverages mobile data transmission technologies (Med Safety,  
13 USSD) in addition to traditional pharmacovigilance methods (paper, online, voice call). The  
14 peer support mechanism has several layers of supervision from the mentored PLHIV, through  
15 peer supporters, peer supervisors, study coordinator to study investigators at the top of the  
16 hierarchy, see **Figure 2**.  
17  
18

19 The PLHIV to be mentored in the intervention arm will be assigned to peer supporters to guide  
20 their ART care for 4-months. The peer supporters will constitute a mixed group of lay people,  
21 namely; i) expert clients who are PLHIV with more experience in the use of ART and, ii)  
22 recognized community health workers (CHWs). Most CHWs in Uganda's HIV programs are  
23 expert clients. Thus, it is possible to recruit CHWs all of whom are expert clients. Peer  
24 supporters in the intervention arm will guide the mentored PLHIV to report ADRs to NPC and  
25 improve the latter's healthcare-seeking behaviour. The PLHIV should own mobile phones.  
26  
27

28 The PLHIV to be mentored will be identified by verbal communication/ written announcements  
29 on noticeboards at the study sites and matched with the respective peer supporters of similar  
30 age, gender and proximity of residence. The non-random matching of PLHIV to peer  
31 supporters is intended to promote easier and faster bonding of the peer-relationships. Five (5)  
32 PLHIV will be assigned to one (1) peer supporter from the same community. A weekly  
33 (minimum fortnightly) face-to-face/phone call interaction will be held between a peer supporter  
34 and each assigned PLHIV. Thus, a peer supporter will be expected to interact with one PLHIV  
35 per day and five PLHIV in five days each week. Each PLHIV to be supported will be introduced  
36 to an assigned PLHIV by the research team and focal health facility staff. The procedure for  
37 the weekly interaction will be illustrated to the PLHIV-peer supporter pair. The mentored PLHIV  
38 and peer supporter will be provided with the telephone contacts of the study coordinator/ focal  
39 health facility staff whom they could notify at any time when they want to terminate  
40 engagement.  
41  
42  
43  
44

45 Peer supporters will use one-on-one in-person support blended with mobile phone-based  
46 interaction to guide each assigned PLHIV to recognize and report suspected ADRs to NPC.  
47 The peer supporter will also administer a short weekly questionnaire to each assigned PLHIV  
48 regarding ADR experience in the past 1-week.  
49

50 This peer support intervention adapts the "humanizing healthcare model" developed by *peers*  
51 *for progress*, a group that demonstrates the value and best practices of peer support. The  
52 model is based on four functions, namely; assistance in daily management, providing social  
53 and emotional support, linking to clinical and community resources and ongoing support[38],  
54 see **Figure 3**.  
55  
56

57 Both the supported PLHIV and peer supporters will be trained on the following aspects: ART;  
58 how to live positively with HIV; recognition of suspected ADRs and how to report them via Med  
59  
60



1  
2  
3 Safety, USSD or traditional methods (paper, online, voice call) to NPC; and about linkage or  
4 referral to health facility care e.g. when a serious ADR occurs. The supported PLHIV and peer-  
5 supporters will be trained to interact in a manner that ensures confidentiality. The data  
6 generated from Med Safety and USSD will be safeguarded according to applicable laws on  
7 data protection. The linkage to appropriate care of PLHIV by the peer supporter will aim to; i)  
8 promote healthcare-seeking behaviour of the PLHIV, ii) improve the monitoring of HIV  
9 treatment (management of serious ADRs, ART adherence, retention in care), iii) enhance  
10 timely refill of ART prescriptions and/or, iv) provide for any other special care that PLHIV might  
11 require.  
12  
13

14  
15 Peer supporters will be separately trained and skilled in interpersonal interaction to be  
16 responsive to PLHIV and encourage them to identify and report any suspected ADRs. The  
17 training components for peer supporters will include care in chronic illness, ART, adherence  
18 to ART, ADRs, ADR-reporting, care-seeking, counselling and facilitative supervision. Training  
19 for the peer supporters will take up to three days. It will include a one-day didactic session  
20 followed by two days of on-the-job, one-on-one training. In addition to being trained, peer  
21 supporters will receive supplementary educational materials. Four follow-up  
22 supervisory visits/phone calls at two-week intervals will be conducted by the trainers to  
23 reinforce the knowledge, skills and attitudes gained by the peer supporters. Each supported  
24 PLHIV will receive one-day's training during his/her clinic visit which will include a didactic  
25 session and one-on-one discussion in a non-classroom environment. The trainers will be  
26 qualified individuals carefully identified by the project team with the requisite knowledge to  
27 offer the training and expertise in adult learning and counselling.  
28  
29  
30

31 The peer support mechanism will have two additional layers of supervision, see **Figure 2**. The  
32 first level of additional oversight will be provided by four (4) peer supervisors identified from  
33 among the peer supporters at each of the four selected RRHs. Peer supervisors will be  
34 seconded by the study sites and collaborating patient safety groups involved in the recruitment  
35 of peer supporters. Each peer supervisor will oversee 15 peer supporters in his/her region (10  
36 from RRH, 3 from HC IV, 2 from HC III). The peer supervisor will call each peer supporter  
37 twice a month. During these 'booster' sessions, the peer supervisor will review, emphasize  
38 and re-educate peer supporters on expectations of the intervention e.g. setting and reviewing  
39 goals with PLHIV. The second level of oversight will be provided by the project coordinator  
40 who will oversee the four (4) peer supervisors whom he/she will meet/call every month. At  
41 least one study investigator, mostly the principal investigator, will participate in these  
42 meetings/calls. The project coordinator will have the requisite knowledge, skills and  
43 competence to train PLHIV and peer supporters. The project coordinator will provide support  
44 supervision and counselling to motivate the peer supervisors, peer supporters and PLHIV.  
45  
46  
47  
48  
49

#### 50 The comparison group

51 PLHIV in the comparison group will be mobile phone owners who will be trained to recognize  
52 suspected ADRs and report them to NPC via Med Safety, USSD or the traditional  
53 pharmacovigilance methods (paper, online, toll-free voice call) to a peer-supporter, HCP or  
54 NPC, see **Figure 4**. Smartphone owners will be guided to install Med Safety for ADR-reporting.  
55 PLHIV with non-smartphones or smartphone owners who will not install Med Safety will report  
56 ADRs by USSD or the traditional reporting methods. PLHIV in this group will not receive  
57 dedicated peer support.  
58  
59  
60

### Study units, participants and selection

#### Study units and participants:

This study has multiple study units and layers to assess the feasibility of implementation and effect of the intervention on promoting the detection and reporting of suspected ADRs in PLHIV on DTG-based ART and/or IPT in Uganda. From micro to macro-level, the study units include PLHIV receiving DTG-regimens and/or IPT; the pair of PLHIV and peer supporter; the peer supporter; the combination of the PLHIV with peer supporter and ART-site; peer supervisor; the pair of peer supervisor and peer supporter; and the ART-site. At the study ART-site, HCPs and health facility managers will be included. Lastly, the reporting of suspected ADRs by PLHIV, peer supporters, HCPs and ART-sites to the NPC will also be examined.

About 17% of PLHIV are ART-naive, 95% are aged 15 years and older, and 89% receive first-line ART either as treatment-naive or treatment-experienced PLHIV[36].

#### Eligibility criteria:

*Inclusion criteria:* Selection of study units will occur at three levels: *First*, eligible PLHIV should i) be aged  $\geq 15$  years, ii) receive ART at the selected study sites, iii) own a mobile phone (smartphone, basic feature phone) and, iv) provide written/thumb-printed informed consent. Child consent can be given by emancipated minors aged 15 to 17 years in Uganda[39] *Second*, eligible peer supporters (expert clients, CHWs) will be those that are recognized and seconded by the study sites or collaborating patient safety groups. These peer supporters will be those that are attached to the study sites and have already received institutional training in their role as expert clients/CHWs; they should own mobile phones. A focal clinical staff assigned to the study by the health facility administration will approach and recruit the peer supporters. The recruited peer supporters will be screened by the research team to gauge their ability to be peer supporters e.g. the ability to use the Med Safety App/USSD, ability to read and write in English and good interpersonal skills. Satisfactory peer supporters will give written informed consent. Peer supporters will participate only in the intervention arm of the study. *Third*, study health facilities will be selected and enrolled as follows; in each of the four geographical regions, blocks of three health facilities each with an ART-site, including at least a RRH, HC IV and HC III will be created based on the catchment of each RRH. From the created blocks of three health facilities in each region, two blocks will be selected by simple random sampling to participate in the study as the intervention and comparison health facilities, respectively. This will give 24 ART-sites consisting of 12 intervention sites (4 RRHs, 4 HC IVs, 4 HC IIIs) matched by level of care and region with 12 comparison sites (4 RRHs, 4 HC IVs, 4 HC IIIs) selected from the four geographical regions of Uganda.

*Exclusion criteria:* Exclusion will apply only at the level of PLHIV and CHWs. We shall exclude PLHIV on ART for < 6-months and expert clients/ CHWs who will be unable to commit, from the outset, at least 5-hrs per week to the study for up to 4-months.

Many ADRs happen when starting ART although such PLHIV tend to be unstable on treatment. The priority of this pilot is to understand the dynamics (feasibility and acceptability) of the peer support intervention in a *stable group* of PLHIV on ART (for  $\geq 6$  months). If found to be feasible, the peer support intervention will be introduced, in future initiatives, to the *unstable group* of PLHIV on ART (for <6 months).

### Sample Size and Sampling Considerations

Sample size computation is based on the possible effect of the peer support intervention on the rate of ADR-reporting by PLHIV, with adjustment for clustering. We assume a conservative intra-cluster correlation coefficient of 0.045 and a priori increase of 50% in the rate of ADR-reporting to NDA, from 6 ADR-reports per 100 person-years at baseline[40] to 9 ADR-reports per 100 person-years at end-line evaluation. We assume a standard deviation of 12 ADR-reports per 100 person-years computed from the monthly ADR-reports submitted to NPC for one-year (October 2018 to September 2019). The study is designed to have at least 80% power to estimate an effect size of 1.5. Thus, 126 PLHIV will be required in the intervention arm and 126 PLHIV in the control arm.

Since the caseload for each peer supporter will be 5 PLHIV in the intervention arm, 60 peer supporters (15 from each of the 4 regions) will be responsible for 300 PLHIV on DTG and/or IPT. Thus, the peer support arm will include 300 PLHIV and the control arm 300 PLHIV all of whom should own functional mobile phones (smartphone or non-smartphone or both). Thus, a total of 600 PLHIV will be enrolled; 400 from RRHs, 120 from HC IVs and 80 from HC IIIs.

The PLHIV will be enrolled consecutively until the required sample size is attained. Smartphone owners will be guided to install Med Safety for ADR-reporting. We assume that 7 in 10 PLHIV at the ART-sites will have mobile phones and only one in 10 will possess smartphones[41]. Thus, only up to 10% (or 60) of PLHIV with smartphones will be helped (with maximal support from peer supporters) to download Med Safety. The rest of the 540 PLHIV without smartphones or smartphone owners who will not install Med Safety will report ADRs by USSD or the traditional methods.

### Study variables

*Primary outcomes:* Feasibility of the peer support intervention - attrition rate recorded as the number of study participants who remain in the study until the end of follow-up at 4 months; Number of suspected ADR reports submitted to NPC by PLHIV as measured by questionnaire and data abstracted from the national pharmacovigilance database at baseline and 4 months

### *Other process/output/outcome variables:*

1. Acceptability of the peer support intervention measured using a questionnaire and qualitative interviews at 4 months post-intervention
2. Barriers/facilitators of the peer support intervention measured using a questionnaire during the intervention and qualitative interviews at 4 months post-intervention
3. Fidelity to the peer support intervention measured using a questionnaire and qualitative interviews at 4 months post-intervention
4. Rate of ADR-reporting to NPC by PLHIV as measured by questionnaire and data abstraction from the national pharmacovigilance database at baseline and 4 months
5. Quality of ADR-reports by PLHIV measured by questionnaire and data abstraction from the national pharmacovigilance database at baseline and 4 months
6. Time to ADR-reporting to NPC by PLHIV since enrolment measured by questionnaire and data abstraction from the national pharmacovigilance database during 4 months
7. Time from ADR onset to registration in the national pharmacovigilance database measured by questionnaire and data abstraction from the database during 4 months
8. Health-related quality of life measured by questionnaire at baseline and 4 months
9. Management of ADRs recorded using a questionnaire during the 4 months
10. Number of PLHIV linked to health facilities by peer supporters for ADR management as measured by questionnaire during the 4-month intervention period

11. Health-seeking behaviour measured using a questionnaire at baseline and 4 months
12. Self-efficacy to report ADRs measured by questionnaire at baseline and 4 months
13. Self-reported ART adherence measured by questionnaire at baseline and 4 months
14. Mood (positive/ negative affect) measured by questionnaire at baseline and 4 months

## Patient and Public Involvement

Direct involvement of PLHIV in the detection and reporting of suspected ADRs, and patient safety groups in recruitment of PLHIV, will have value in improving the public's awareness of ADRs and the available pharmacovigilance tools (Med Safety, USSD, toll-free voice call, etc.). Together, these will be essential for ensuring that changes to clinical practice to promote patient safety based on our work are acceptable to the public.

The study team will work with PLHIV to assess whether the available pharmacovigilance tools meet their needs, to identify potential improvements and to understand facilitators and barriers to using these pharmacovigilance tools. Wider public input into the refinement of the tools and mechanisms to encourage uptake will add value to our work. This work will also be of value to the wider public as Med Safety can be used to report ADRs to any drug, and users can receive drug safety information directly from NPC.

## Data management and statistical analysis

### Quantitative data

**Data collection and management:** Baseline and end-line semi-structured questionnaires will be administered to the PLHIV and peer supporters (expert clients) in the intervention arm and PLHIV only in the comparison arm.

The baseline questionnaire will record socio-demographics (age, sex, monthly income, education level, residence) of all study participants. Clinical details (ART adherence; ADRs; ART-regimen; ART-status i.e. first-line, second-line, third-line; duration on ART; comorbidities) and healthcare-seeking behaviour of study PLHIV will be measured. Data will be transmitted to a password-protected online database via the Open Data Kit (ODK) suite of tools. Participating PLHIV will be asked at enrolment if they experienced suspected ADRs in the 4-months preceding the study. The self-reported suspected ADRs will be corroborated with additional information on documented suspected ADRs from retrospective clinical chart review of the 4-month period prior to study enrolment. The clinical charts will be accessed by the health facility staff.

**Additional data collection for the intervention group:** On a weekly basis for up to 4-months, peer supporters will inquire from each assigned PLHIV (during a 1 hour face-to-face or phone call interaction) if he/she experienced one or more suspected ADR(s) and if the ADR had any impact on quality of life and/or ART adherence. Peer supporters will document if the ADR(s) was/were reported; and, if reported, by which means (Med Safety, USSD, voice call, other methods). Peer supporters will document all ADRs experienced by the PLHIV during the previous 1-week (using a tool designed to capture the medicines and ADRs); and will guide the PLHIV to report ADRs directly to NPC using the available pharmacovigilance methods. Active surveillance of ADRs linked to DTG and/or IPT will be prioritized but ADRs linked to other medicines will also be documented. PLHIV who experience serious ADRs will be linked directly to the health facilities where they receive ART for ADR management. Peer supporters will refer serious ADR cases to peer supervisors who will, in turn, refer these cases to focal clinical staff assigned to the study by the health facility administration; usually stationed at

1  
2  
3 triage to connect the cases to clinicians. We will document the management of serious and  
4 non-serious ADRs (number of serious and non-serious ADR cases referred for health facility  
5 management; actions taken by health facilities in the management of serious and non-serious  
6 ADRs e.g. stopping treatment, changing treatment, continuing treatment with adherence  
7 counselling, doing nothing, etc.).

8  
9 The end-line questionnaire for PLHIV will measure their healthcare-seeking behaviour, linkage  
10 to care for ADR management and adherence to ART. The PLHIV will also be asked to report  
11 their experiences while receiving peer support to assess the intervention's feasibility and  
12 acceptability (e.g. user satisfaction). The study will also assess the participants' experiences  
13 when using the various pharmacovigilance methods (Med Safety, USSD, toll-free voice call,  
14 etc.). We shall assess the ease of use, language and costs of the available pharmacovigilance  
15 methods (Med Safety, USSD, toll-free voice call, etc) alongside peer support.  
16  
17

18  
19 **Med Safety App and USSD data collection:** PLHIV will submit ADR-reports via Med Safety  
20 and/or USSD with initial assistance from peer supporters. Each app-based ADR-report will be  
21 automatically converted into the standard E2B (R2) format prior to its receipt in the Vigilance  
22 Hub[42]. The app is hosted by Uganda's NDA which manages the reported ADR data. For  
23 USSD reporting, PLHIV will dial the USSD code and answer a set of questions. The data will  
24 be stored in real-time on a dashboard accessible to the project staff.  
25

26  
27 **Statistical analysis:** All ADR-data in both the national and project databases and received  
28 from the study sites during the study period will be exported into Stata version 15.0 MP for  
29 descriptive analysis – frequencies, proportions and their 95% confidence intervals (StataCorp  
30 LLC, College Station, Texas). Duplicate ADR-reports will be identified and analysed  
31 accordingly. Summary estimates will be reported by pharmacovigilance method (Med Safety,  
32 USSD, toll-free voice call, etc.).  
33

34  
35 To assess the feasibility to retain peer supporters and PLHIV, we shall compute the attrition  
36 rate which is the proportion of study participants who remain in the study until the end of follow-  
37 up at 4 months.  
38

39  
40 The number of suspected ADRs reported to NPC by the PLHIV overall and in each study arm  
41 will be described by subgroup: serious ADR (yes/no); peer supporter guided (yes/no); DTG-  
42 linked (yes/no); IPT-linked (yes/no); DTG/IPT-linked (yes/no); linked to other medicines  
43 (yes/no); level of reporting (PLHIV, peer supporter, HCP, health facility) etc.  
44

45  
46 The rate of ADR-reporting ( $m_a$ ) by PLHIV (per site, overall) per completed-month ( $m_1$ ) of follow-  
47 up will be computed as follows:  $m_a = [n_a \text{ reports}/(N_a \text{ completed-months of follow-up})]$ , where  
48  $n_a$  is the number of reported ADRs and  $N_a$  the number of completed-months of follow-up.  
49 Reporting rates of same-day ADR-onsets will be documented; and time from ADR-onset to  
50 registration in the national database recorded for all other events[33]. Time to ADR-reporting  
51 to NPC for a PLHIV will be the time from the day a PLHIV is enrolled into the peer support  
52 intervention to the time he/she reports the first suspected ADR to NPC. Time-to-event data  
53 will be analysed by survival analysis techniques.  
54

55  
56 We will explore the influence of level of care on the uptake of the peer support intervention in  
57 Uganda's healthcare system - such as whether rolling it out at primary care facilities or tertiary  
58 hospitals influences uptake.  
59  
60

1  
2  
3 The change in outcome measures (e.g.) between pre- and post-intervention in PLHIV will be  
4 assessed using a linear mixed model with random effect for peer supporter. Random effect  
5 will be included to account for clustering of PLHIV with peer supporters. The ICC will be  
6 estimated from this model. Since supporters are a mixed population of expert clients and  
7 CHWs, a stratified analysis will be conducted. To aid the planning of future randomized  
8 controlled trials from this pilot's data, we shall report effect sizes.  
9  
10

### 11 Qualitative data

12 **Data collection:** Post-intervention, a combination of focus group discussions (FDGs), in-  
13 depth interviews (IDIs) and Key Informant Interviews (KIIs) will be conducted with purposively  
14 selected study participants. A lead qualitative researcher will be assisted by two well-trained  
15 research assistants. Semi-structured interviews informed by the Consolidated Framework for  
16 Implementation Research (CFIR)[43] will be used to elicit participants' perspectives on the  
17 facilitators and barriers to implementing the peer support intervention at four purposively  
18 selected health facilities.  
19  
20

21 We will conduct six FDGs with three categories of PLHIV in the intervention arm; two with  
22 those enrolled in Community Drug Distribution Points (CDDPs), two in Community Client-Led  
23 ART Delivery (CCLAD) and two in facility-based ART delivery models.  
24  
25

26 A total of 12 IDIs will be conducted with peer supporters (expert clients, CHWs) attached to  
27 each of the three ART delivery models; a) CDDP, b) CCLAD, c) Facility-Based, see **Figure 5**.  
28  
29

30 Four KIIs will be conducted with HCPs/facility managers with insights in the implementation  
31 experience of the peer support intervention at their respective host facilities from an  
32 organizational-context.  
33

34 As a first step, participants will complete a written informed consent form. We will then capture  
35 baseline characteristics: age, gender and educational level. A CFIR-informed semi-structured  
36 guide will be used for the interviews. The semi-structured guide will explore participants'  
37 experiences with the peer support intervention, their preferences and suggestions for  
38 improvement of the intervention and the challenges encountered in using USSD and/or Med  
39 Safety. On average, the duration of the FDGs and IDIs will be approximately 45-60 min. The  
40 FDGs, IDIs and KIIs will be conducted until theoretical saturation is reached. Theoretical  
41 saturation means that no new knowledge is generated and all aspects of a theory are covered.  
42 All the data generated from the focus groups and interviews will be explored for themes and  
43 sub-themes.  
44  
45  
46

47 **Guiding qualitative analytical framework:** The CFIR will be adopted as the overall guiding  
48 analytical framework for this study. The CFIR is a comprehensive 'meta-theoretical'  
49 implementation research framework compiled from more than 20 sources and is cross-cutting  
50 in more than 13 scientific disciplines; it guides systematic assessment of multi-level  
51 implementation settings to identify factors that influence intervention implementation and  
52 effectiveness [44]. The CFIR informs the conceptualization of this study, will guide the  
53 development of data collection tools and will serve as an overarching deductive thematic  
54 framework in analysis of study findings and the overall synthesis and interpretation of results  
55 for this study. The CFIR is widely-applied because of its multi-level, 'ecological' dimensions  
56 on multi-faceted influences on healthcare intervention implementation outcomes[45]. The  
57 CFIR has been applied across diverse interventions and varied content fields[44].  
58  
59  
60

1  
2  
3 More specifically, the CFIR-derived domains that will guide the study are the following:

4 *Intervention characteristics:* Implementation of the peer support intervention could potentially  
5 be impacted by factors including its perceived effectiveness in ADR-reporting, relative  
6 advantages over alternative reporting approaches, adaptability in varied resource-constrained  
7 settings, trialability, complexity, design quality and presentation, and cost-effectiveness.  
8  
9

10 *Outer setting:* external influences on implementation of peer support may include external  
11 policies and incentives, socio-cultural belief systems, peer pressure dynamics and socio-  
12 economic context.  
13

14 *Inner setting:* characteristics of the implementing organization (or host health facility) such as  
15 organizational culture, the relative priority assigned to the peer support intervention (including  
16 funding support), presence of intervention 'champions', availability of supportive administrative  
17 or physical infrastructure, congruence with host organization's mission and vision, quality of  
18 leadership support and implementation climate(s).  
19  
20

21 *Characteristics of individuals:* Patients' beliefs, knowledge, level of income, self-efficacy, and  
22 personal attributes that may affect the implementation and uptake of the peer support  
23 intervention.  
24  
25

26 *Process of implementation:* Influences on implementation outcomes may derive from different  
27 implementation phases involved in roll-out of the peer support strategy such as degree and  
28 quality of involvement of primary beneficiaries in designing the intervention, planning,  
29 execution, degree of effectiveness of monitoring and evaluation strategies and presence of  
30 key intervention stakeholders and influencers including opinion leaders, stakeholder  
31 engagement, and intervention champions.  
32  
33

34 The CFIR will be used to identify barriers and facilitators of the peer support intervention for  
35 promoting ADR-reporting by PLHIV.  
36

37 **Data analysis:** Our qualitative data analysis will follow the procedures recommended by Miles  
38 & Huberman (1994)[46]. Interviews and FGDs will be audio-recorded and transcribed verbatim  
39 into text transcripts by three research assistants (and translated into English where  
40 necessary). Data will be analysed, in an iterative process, involving four major steps:  
41  
42

43 a) *Data familiarization:* An experienced qualitative researcher and one other investigator will  
44 read the interview transcripts multiple times for data familiarization.  
45

46 b) *Developing a coding framework:* We shall adopt the five CFIR-derived domains  
47 (*Intervention characteristics, outer setting, inner setting, characteristics of individuals, and*  
48 *process of implementation*) as an overarching deductive thematic framework, combined with  
49 an inductive approach based on the data[47].  
50

51 c) *Data abstraction:* The coded data will be categorized into thematic categories.  
52  
53

54 d) *Overall interpretation and synthesis:* Our overall synthesis of study findings will adopt a  
55 team-based process of peer-debriefing involving all investigators to resolve disagreements in  
56 interpretation of study findings.  
57  
58  
59  
60

### Quality assurance

To ensure uniform study procedures and high-quality data, all research assistants recruited for the study will receive face-to-face training on the following: the informed consent process, participant interviewing techniques, confidentiality issues, pharmacovigilance, use of the Med Safety App, use of the USSD, ADRs, use of the Open Data Kit (ODK) software for data entry into an online password-protected database; and qualitative and quantitative study designs, among others.

The FGDs and KIs will be led by an expert in qualitative research. Research assistants with prior training in qualitative research methods will also be hired for the qualitative study component. All research assistants will receive face-to-face training in both qualitative and quantitative research methods.

Questionnaire data will be transmitted through ODK to an online database by the research assistants while still in the field. The study statistician will check the online data for integrity and contact field staff as soon as possible while still in the field to correct any data entry errors. Prior to entry into ODK, all research assistants shall be required to cross-check the data on study questionnaires to eliminate errors and ensure data completeness.

### Results uptake and use

*Outcomes/Impact/Outreach:* The peer support intervention is expected to increase patient-reporting of ADRs to NPC. It is anticipated that the patients will subsequently; i) find it easier and faster to report ADRs (including DTG- and IPT-related reactions) anywhere and at any time using their mobile phones and, ii) receive medication-safety alerts directly from NPC to their phones. We expect this project to promote pharmacovigilance in Uganda by improving; i) the exchange of medication-safety information between patients, peer supporters, HCPs and NPC, ii) the awareness of pharmacovigilance by patients and the public through the mobile phone and other awareness campaigns and, iii) the rate of ADR-reporting by patients.

*Potential impact on policy or programs:* This project could foster the increased involvement of patients in pharmacovigilance activities and improve the efficiency of pharmacovigilance systems in Uganda with real-time monitoring of DTG and INH safety in PLHIV in the first instance, thus, increasing the volume of analysable data for quick decision-making by both clinicians and policy makers.

We expect to promote collaboration between consumers/public and the NPC, national AIDS Control Program - Ministry of Health and the National TB and Leprosy Control Programme (NTLP). The accumulation of relevant medication-safety data from spontaneous and active ADR-reports permits robust detection of safety signals at the national and international levels.

*Scalability:* After this pilot project, we expect the peer support intervention to be tested in a nationwide randomized controlled trial; and the USSD and Med Safety App to be modified accordingly and implemented at all 1,832 ART-sites in Uganda to complement the existing active and passive pharmacovigilance methods for ART and TB treatment. We hope to embed peer support in routine pharmacovigilance practice to promote the detection and reporting of ADRs by PLHIV in Uganda. The Med Safety App is available in English and will be subsequently translated into other local languages according to need.



1  
2  
3 The USSD and Med Safety are potentially invaluable tools for the pharmacovigilance of drugs  
4 used for other diseases e.g. non-communicable diseases like cancers, diabetes mellitus,  
5 hypertension etc.  
6

7  
8 Peer support, USSD and Med Safety will be scaled-up to support spontaneous ADR-reporting  
9 in both public and private health facilities at all levels of healthcare ranging from hospitals,  
10 medical centres and clinics to pharmacies and drug shops, not least, the general public.  
11

12 The pharmacovigilance data at NPC could be linked with the patients' clinical data at ART-  
13 sites, stock consumption data from the Supply Management Chain system; and the electronic  
14 Health Management Information System. Machine learning/artificial intelligence analytical  
15 techniques could then be used on big data in the near future to foster improved systems.  
16

17  
18 *Sustainability:* Peer support to promote the detection and reporting of ADRs by PLHIV can be  
19 embedded in the HIV/AIDS program of Uganda just as community engagement programmes  
20 have been successful in Maternal and Child Health programmes; and are being rolled out in  
21 the COVID-19 Community Engagement Strategy and the Young people and Adolescent Peer  
22 Support Model for improving HIV care and treatment outcomes for Adolescents and young  
23 PLHIV of 2019 in Uganda[48, 49]. The USSD and Med Safety will be integrated into NPC's  
24 routine pharmacovigilance functions to complement existing pharmacovigilance methods.  
25 Regional pharmacovigilance centres have pharmacovigilance focal persons who will continue  
26 to support the NPC. All ADR-reports received by NPC are reviewed and submitted into an  
27 existing national medication-safety database. The equipped peer supporters are a valuable  
28 resource for scaling up peer support in the ART-sites after the study is concluded.  
29  
30

31  
32 The USSD interface and Med Safety will be freely available. Med Safety can be downloaded  
33 and installed from both Google Play and Apple iOS stores. NPC pays the salaries of its full-  
34 time pharmacovigilance staff who receive and process the reported medication-safety data.  
35

36 The research collaboration between Makerere University's Department of Pharmacology,  
37 Department of Pharmacy, NPC, ACP, MHRA and other stakeholders will continue to source  
38 for additional research grants to support the future scale-up of evidence-based digital  
39 pharmacovigilance in Uganda. The findings could be helpful to other countries to inform their  
40 own pharmacovigilance activities.  
41  
42

### 43 **Dissemination**

44  
45 Med Safety users will immediately benefit from the app's two-way communication functionality  
46 as they will receive medication-safety alerts from NPC in addition to their submission to NPC  
47 of ADR-reports.  
48

49 We plan to present the project's research findings at local stakeholders' workshops organized  
50 to ensure the balanced representation of HCPs, administrators, policy makers, patient safety  
51 groups, the public and other local and international partners. At least one policy brief will be  
52 prepared from this work. We shall also disseminate the results at three or more local and  
53 international conferences, engage the public through local and international television  
54 channels, and through social media (Facebook, Twitter, WhatsApp, blogging etc.). We shall  
55 publish at least two manuscripts in internationally-recognized peer-reviewed journals.  
56  
57  
58  
59  
60

### **Ethical and environmental considerations**

The study received ethical approval from the School of Health Sciences Research and Ethics Committee at Makerere University College of Health Sciences (MAKSHSREC-2020-64); and was registered with the Uganda National Council for Science and Technology (HS1206ES). Administrative clearance will be obtained from participating ART-sites and written/thumb-printed informed consent from participating PLHIV and expert clients/CHWs. We consider the introduction of USSD and Med Safety for ADR-reporting to be a minimal risk intervention. However, we shall remind participants to mind their own confidentiality which could be lost due to phone sharing. On the contrary, participants in the intervention group could potentially benefit from peer-support. We received a waiver of consent from the ethics committee to access anonymized clinical and medication data of PLHIV at the health facilities. The data will be extracted by staff of the respective health facilities. Applicable international laws on data protection will be observed as well as the Data Protection and Privacy Act, 2019 of the Republic of Uganda[50].

### **Risk management**

*Small number of patients ( $\leq 10\%$ ) expected to own functional smartphones:* Our main goal is to demonstrate that Med Safety can be downloaded and used by PLHIV, which we can achieve without the requirement for strict sample size and power calculations. Also, we shall use the USSD which can work on both basic low-tech mobile phones and high-tech smartphones.

*Duplicate ADR-reports:* Duplicates will be identified by the NPC staff and study statistician.

*Loss to follow-up of peer supporters and PLHIV:* A major goal is to demonstrate the feasibility of peer support for PLHIV to get involved in ADR-reporting. The study will provide preliminary data on the magnitude of loss to follow-up to be expected in future studies.

*Compromise in data quality by the research assistants:* The research assistants will be trained by the study team. Questionnaire data will be transmitted online immediately using ODK – thus giving a chance to the centrally located statistician to verify data integrity.

*COVID-19:* We shall observe the SOPs of social distancing, washing hands and wearing masks by study participants and investigators to minimise the risk of spreading COVID-19. The pandemic could limit face-to-face contact but is also an opportunity to show how more remote engagement can support pharmacovigilance in a developing country setting. Remote engagement could be more cost-effective to support participants through phone calls and other forms of online interaction.

### **Collaboration**

MHRA adapted Med Safety for Uganda with NDA's approval. The NPC staff at NDA, where NPC is located, will participate in this project. Involvement of the ACP in this pharmacovigilance project will promote the integration of peer support-driven pharmacovigilance in the HIV care and treatment programme of Uganda. The Department of Pharmacology & Therapeutics and Department of Pharmacy, Makerere University conceived this project and will coordinate the study. The WHO contracted MHRA to adapt the app for Uganda and will, together with UMC, provide technical support.

**Acknowledgements:** Uganda's National Drug Authority provided technical and logistical support during the planning phase of this project.

1  
2  
3 **Contributors:** RK, HZ, FK, SMN, JNS designed the study. RK drafted the manuscript. RK,  
4 HBN, VN, CK, HZ, SMN, JNS, PT, KH, CSM, MR, FK critically reviewed and revised the final  
5 version of the manuscript. All authors read and approved the final manuscript.  
6

7 **Funding:** This project was supported by the Special Program for Research and Training in  
8 Tropical Diseases (TDR), a co-sponsored program of the United Nations Children's Fund, the  
9 United Nations Development program, the World Bank, and the World Health Organization  
10 (No grant number). TDR funding was provided by governmental and co-sponsor core  
11 contributions to TDR.  
12

13 **Disclaimer:** CS Merle and ME Raguenaud are staff members of the WHO; the authors alone  
14 are responsible for the views expressed in this publication and they do not necessarily  
15 represent the decisions, policies or views of WHO.  
16

17 **Competing interests:** None declared.  
18

19 **Patient consent for publication:** Not required.  
20

21 **Provenance and peer review:** Not commissioned; externally peer reviewed.  
22

23 **Open access:** This is an open access article distributed in accordance with the Creative  
24 Commons Attribution Non-Commercial (CC BY-NC 4.0) license, which permits others to  
25 distribute, remix, adapt, build upon this work non-commercially,  
26 and license their derivative works on different terms, provided the original work is properly  
27 cited, appropriate credit is given, any changes made indicated, and the use is non-commercial.  
28 See: <http://creativecommons.org/licenses/by-nc/4.0/>.  
29  
30  
31  
32  
33  
34  
35  
36  
37  
38  
39  
40  
41  
42  
43  
44  
45  
46  
47  
48  
49  
50  
51  
52  
53  
54  
55  
56  
57  
58  
59  
60

## References

1. Johnson, J.A. and J.L. Bootman, *Drug-related morbidity and mortality and the economic impact of pharmaceutical care*. Am J Health Syst Pharm, 1997. **54**(5): p. 554-8.
2. Kiguba, R., C. Karamagi, and S.M. Bird, *Incidence, risk factors and risk prediction of hospital-acquired suspected adverse drug reactions: a prospective cohort of Ugandan inpatients*. BMJ Open, 2017. **7**(1): p. e010568.
3. Tumwikirize, W.A., et al., *Adverse drug reactions in patients admitted on internal medicine wards in a district and regional hospital in Uganda*. Afr Health Sci, 2011. **11**(1): p. 72-8.
4. Coleman, J.J. and S.K. Pontefract, *Adverse drug reactions*. Clin Med (Lond), 2016. **16**(5): p. 481-485.
5. Onakpoya, I.J., C.J. Heneghan, and J.K. Aronson, *Post-marketing withdrawal of 462 medicinal products because of adverse drug reactions: a systematic review of the world literature*. BMC Med, 2016. **14**: p. 10.
6. Bates, D.W., et al., *Incidence of adverse drug events and potential adverse drug events. Implications for prevention. ADE Prevention Study Group*. JAMA, 1995. **274**(1): p. 29-34.
7. Hazell, L. and S.A. Shakir, *Under-reporting of adverse drug reactions : a systematic review*. Drug Saf, 2006. **29**(5): p. 385-96.
8. Kiguba, R., et al., *Recognition and reporting of suspected adverse drug reactions by surveyed healthcare professionals in Uganda: key determinants*. BMJ Open, 2014. **4**(11): p. e005869.
9. Lopez-Gonzalez, E., M.T. Herdeiro, and A. Figueiras, *Determinants of under-reporting of adverse drug reactions: a systematic review*. Drug Saf, 2009. **32**(1): p. 19-31.
10. Defer, G., et al., *Adverse Drug Reaction Reporting Using a Mobile Device Application by Persons with Multiple Sclerosis: A Cluster Randomized Controlled Trial*. Drug Saf, 2021. **44**(2): p. 223-233.
11. Margraff, F. and D. Bertram, *Adverse drug reaction reporting by patients: an overview of fifty countries*. Drug Saf, 2014. **37**(6): p. 409-19.
12. Inácio, P., A. Cavaco, and M. Airaksinen, *The value of patient reporting to the pharmacovigilance system: a systematic review*. 2017. **83**(2): p. 227-246.
13. Avery, A.J., et al., *Evaluation of patient reporting of adverse drug reactions to the UK 'Yellow Card Scheme': literature review, descriptive and qualitative analyses, and questionnaire surveys*. Health Technol Assess, 2011. **15**(20): p. 1-234, iii-iv.
14. Ramlakhan, J.U., et al., *What constitutes patient-centred care for women: a theoretical rapid review*. Int J Equity Health, 2019. **18**(1): p. 182.
15. Ministry of Health Uganda. *Consolidated Guidelines for Prevention and Treatment of HIV in Uganda*. 2018 [cited 2019 19 September]; Available from: <http://library.health.go.ug/publications/hivaids/consolidated-guidelines-prevention-and-treatment-hiv-uganda>.
16. Ministry of Health Uganda, *Consolidated guidelines for the prevention and treatment of HIV and AIDS in Uganda Kampala, Uganda*. 2020, Ministry of Health Uganda.
17. Johnson, S., et al., *Peer-supported self-management for people discharged from a mental health crisis team: a randomised controlled trial*. Lancet, 2018. **392**(10145): p. 409-418.
18. Kong, L.N., et al., *The effectiveness of peer support on self-efficacy and quality of life in adults with type 2 diabetes: A systematic review and meta-analysis*. J Adv Nurs, 2019. **75**(4): p. 711-722.
19. Ammon, N., S. Mason, and J.M. Corkery, *Factors impacting antiretroviral therapy adherence among human immunodeficiency virus-positive adolescents in Sub-Saharan Africa: a systematic review*. Public Health, 2018. **157**: p. 20-31.
20. Snyder, K., et al., *Preliminary results from Hlanganani (Coming Together): A structured support group for HIV-infected adolescents piloted in Cape Town, South Africa*. Children and Youth Services Review, 2014. **45**: p. 114-121.
21. Genberg, B.L., et al., *Improving Engagement in the HIV Care Cascade: A Systematic Review of Interventions Involving People Living with HIV/AIDS as Peers*. AIDS Behav, 2016. **20**(10): p. 2452-2463.

- 1
  - 2
  - 3
  - 4
  - 5
  - 6
  - 7
  - 8
  - 9
  - 10
  - 11
  - 12
  - 13
  - 14
  - 15
  - 16
  - 17
  - 18
  - 19
  - 20
  - 21
  - 22
  - 23
  - 24
  - 25
  - 26
  - 27
  - 28
  - 29
  - 30
  - 31
  - 32
  - 33
  - 34
  - 35
  - 36
  - 37
  - 38
  - 39
  - 40
  - 41
  - 42
  - 43
  - 44
  - 45
  - 46
  - 47
  - 48
  - 49
  - 50
  - 51
  - 52
  - 53
  - 54
  - 55
  - 56
  - 57
  - 58
  - 59
  - 60
22. Davidson, L., et al., *Peer support among adults with serious mental illness: a report from the field*. Schizophr Bull, 2006. **32**(3): p. 443-50.
23. Lawn, S., A. Smith, and K. Hunter, *Mental health peer support for hospital avoidance and early discharge: An Australian example of consumer driven and operated service*. Journal of Mental Health, 2008. **17**(5): p. 498-508.
24. Ratzlaff, S., et al., *The Kansas Consumer as Provider program: measuring the effects of a supported education initiative*. Psychiatr Rehabil J, 2006. **29**(3): p. 174-82.
25. Repper J, et al. *Peer support workers: theory and practice*. 2013 [cited 2021 28 May]; Available from: <https://www.centreformentalhealth.org.uk/publications/peer-support-workers-theory-and-practice>.
26. GSMA. *Low Tech, High Impact: USSD in the time of COVID-19*. 2020; Available from: <https://www.gsma.com/mobilefordevelopment/uncategorized/low-tech-high-impact-ussd-in-the-time-of-covid-19/>.
27. WEB-RADR. *Med Safety App*. Available from: <https://web-radr.eu/mobile-apps/med-safety/>.
28. smsone. [cited 2021 26 July]; Available from: <https://smsone.co.ug/>.
29. Ayo C. K., et al., *A prototype mobile money implementation in Nigeria*. African Journal of Business Management, 2012. **6**(6): p. 2195-2201.
30. kolastudios. [cited 2021 26 July]; Available from: <https://kolastudios.com/#contact>.
31. Ghosh, R. and D. Lewis, *Aims and approaches of Web-RADR: a consortium ensuring reliable ADR reporting via mobile devices and new insights from social media*. Expert Opin Drug Saf, 2015. **14**(12): p. 1845-53.
32. Proctor, E., et al., *Outcomes for implementation research: conceptual distinctions, measurement challenges, and research agenda*. Adm Policy Ment Health, 2011. **38**(2): p. 65-76.
33. Kiguba, R., et al., *Adverse Drug Reaction Onsets in Uganda's VigiBase((R)): Delayed International Visibility, Data Quality and Illustrative Signal Detection Analyses*. Pharmaceut Med, 2018. **32**(6): p. 413-427.
34. CQUIN. *Differentiated Service Delivery in Uganda*. 2020; Available from: <https://cquin.icap.columbia.edu/the-work/uganda/>.
35. Ministry of Health Uganda. *The 2019 HIV Epidemiological Surveillance Report for Uganda*. 2020; Available from: <https://www.health.go.ug/cause/the-2019-hiv-epidemiological-surveillance-report-for-uganda/>.
36. PEPFAR. *PEPFAR Uganda Country Operational Plan (COP) 2019 Strategic Direction Summary April 12, 2019*. Available from: [https://www.state.gov/wp-content/uploads/2019/09/Uganda\\_COP19-Strategic-Directional-Summary\\_public.pdf](https://www.state.gov/wp-content/uploads/2019/09/Uganda_COP19-Strategic-Directional-Summary_public.pdf).
37. Levesque, J.-F., M.F. Harris, and G. Russell, *Patient-centred access to health care: conceptualising access at the interface of health systems and populations*. International Journal for Equity in Health, 2013. **12**(1): p. 18.
38. Peers for Progress and National Council of La Raza. *Global Evidence for Peer Support; Humanizing healthcare*. Report from an International Conference [cited 2021 28 May]; Available from: <http://peersforprogress.org/>.
39. Uganda National Council for Science and Technology. *National Guidelines for Research involving Humans as Research Participants*. 2014 [cited 2021 27 July]; Available from: [https://engage.avac.org/wp-content/uploads/grassblade/12230-testing-tincan/story\\_content/external\\_files/Uganda%202014%20National%20guidelines%20for%20research%20involving%20humans%20as%20research%20participants.pdf](https://engage.avac.org/wp-content/uploads/grassblade/12230-testing-tincan/story_content/external_files/Uganda%202014%20National%20guidelines%20for%20research%20involving%20humans%20as%20research%20participants.pdf).
40. Batista, C.J.B., et al., *The Brazilian experience of implementing the active pharmacovigilance of dolutegravir*. Medicine (Baltimore), 2019. **98**(10): p. e14828.
41. The Collaboration on International ICT Policy for East and Southern Africa. *National Information Technology Survey*. 2017 [cited 2021 28 May]; Available from: <https://www.nita.go.ug/sites/default/files/publications/National%20IT%20Survey%20April%2010th.pdf>.

- 1
- 2
- 3
- 4 42. Pierce, C.E., et al., *Recommendations on the Use of Mobile Applications for the Collection and*
- 5 *Communication of Pharmaceutical Product Safety Information: Lessons from IMI WEB-*
- 6 *RADR*. Drug Saf, 2019. **42**(4): p. 477-489.
- 7 43. Damschroder, L.J., et al., *Fostering implementation of health services research findings into*
- 8 *practice: a consolidated framework for advancing implementation science*. Implementation
- 9 Science, 2009. **4**(1): p. 50.
- 10 44. Safaeinili, N., et al., *CFIR simplified: Pragmatic application of and adaptations to the*
- 11 *Consolidated Framework for Implementation Research (CFIR) for evaluation of a patient-*
- 12 *centered care transformation within a learning health system*. Learning Health Systems,
- 13 2020. **4**(1): p. e10201.
- 14 45. Means, A.R., et al., *Evaluating and optimizing the consolidated framework for*
- 15 *implementation research (CFIR) for use in low- and middle-income countries: a systematic*
- 16 *review*. Implementation Science, 2020. **15**(1): p. 17.
- 17 46. Miles, M.B. and A.M. Huberman, *Qualitative data analysis: An expanded sourcebook, 2nd ed.*
- 18 *Qualitative data analysis: An expanded sourcebook, 2nd ed.* 1994, Thousand Oaks, CA, US:
- 19 Sage Publications, Inc. xiv, 338-xiv, 338.
- 20 47. Fereday, J. and E. Muir-Cochrane, *Demonstrating Rigor Using Thematic Analysis: A Hybrid*
- 21 *Approach of Inductive and Deductive Coding and Theme Development*. International
- 22 Journal of Qualitative Methods, 2006. **5**(1): p. 80-92.
- 23 48. Ministry of Health Uganda, *Young people and Adolescent Peer Support Model for improving*
- 24 *HIV care and treatment outcomes for Adolescents and young PLHIV of 2019 in Uganda*.
- 25 2019.
- 26 49. Ministry of Health Uganda. *Technical Inter-sectoral Committee on COVID-19; National*
- 27 *Community Engagement Strategy for COVID-19 Response for Uganda*. 2020 [cited 2021 28
- 28 May]; Available from: [https://www.redcrossug.org/about/more-info/covid-19-](https://www.redcrossug.org/about/more-info/covid-19-community-engagement-strategy)
- 29 [community-engagement-strategy](https://www.redcrossug.org/about/more-info/covid-19-community-engagement-strategy).
- 30 50. Government of Uganda. *Data Protection and Privacy Act, 2019 of the Republic of Uganda*.
- 31 2019 [cited 2021 28 May]; Available from: <https://ict.go.ug> › wp-content › uploads ›
- 32 2019/03.
- 33
- 34
- 35
- 36
- 37
- 38
- 39
- 40
- 41
- 42
- 43
- 44
- 45
- 46
- 47
- 48
- 49
- 50
- 51
- 52
- 53
- 54
- 55
- 56
- 57
- 58
- 59
- 60

## Figures

**Figure 1.** Before-after and there-there quasi-experimental study design for a peer support intervention to improve adverse drug reaction reporting by people living with HIV in Uganda

**Figure 2:** Layers of supervision in the peer support mechanism

**Figure 3.** Four key functions of the humanizing healthcare model for peer support as adapted from the framework by Peers for Progress

**Figure 4.** Intervention and comparison groups with two-way comparisons (before-after for each group (A&C, B&D), and between groups after intervention (C&D).

**Figure 5.** The five Differentiated Service Delivery models of HIV and TB care in Uganda, 2017.

For peer review only



43  
44  
45  
46  
47  
48  
49  
50  
51  
52  
53  
54  
55  
56  
57  
58  
59  
60

**Figure 1.** Before-after and there-there quasi-experimental study design for a peer support intervention to improve adverse drug reaction reporting by people living with HIV in Uganda





**Figure 2.** Layers of supervision in the peer support mechanism



23 *Source: Peers for Progress, Global Evidence for Peer Support; Humanizing Healthcare (September 2014)*

24 **Figure 3.** Four key functions of the humanizing healthcare model for peer support as adapted from  
25 the framework by Peers for Progress  
26  
27  
28  
29  
30  
31  
32  
33  
34  
35  
36  
37  
38  
39  
40  
41  
42  
43  
44  
45  
46  
47  
48  
49  
50  
51  
52  
53  
54  
55  
56  
57  
58  
59  
60



**Figure 4.** Intervention and comparison groups with two-way comparisons (before-after for each group (A&C, B&D), and between groups after intervention (C&D)).



Source: Ministry of Health, *Implementation Guide for Differentiated TB Services in Uganda* (June 2017).

**Figure 5.** The five Differentiated Service Delivery models of HIV and TB care in Uganda, 2017.
